# Supplementary material for: Transcriptomic characterization revealed that METTL7A inhibits melanoma progression via the p53 signaling pathway and immunomodulatory pathway
Source: PeerJ journal article supplement (doi:10.7717/peerj.15799), 2023-08-02

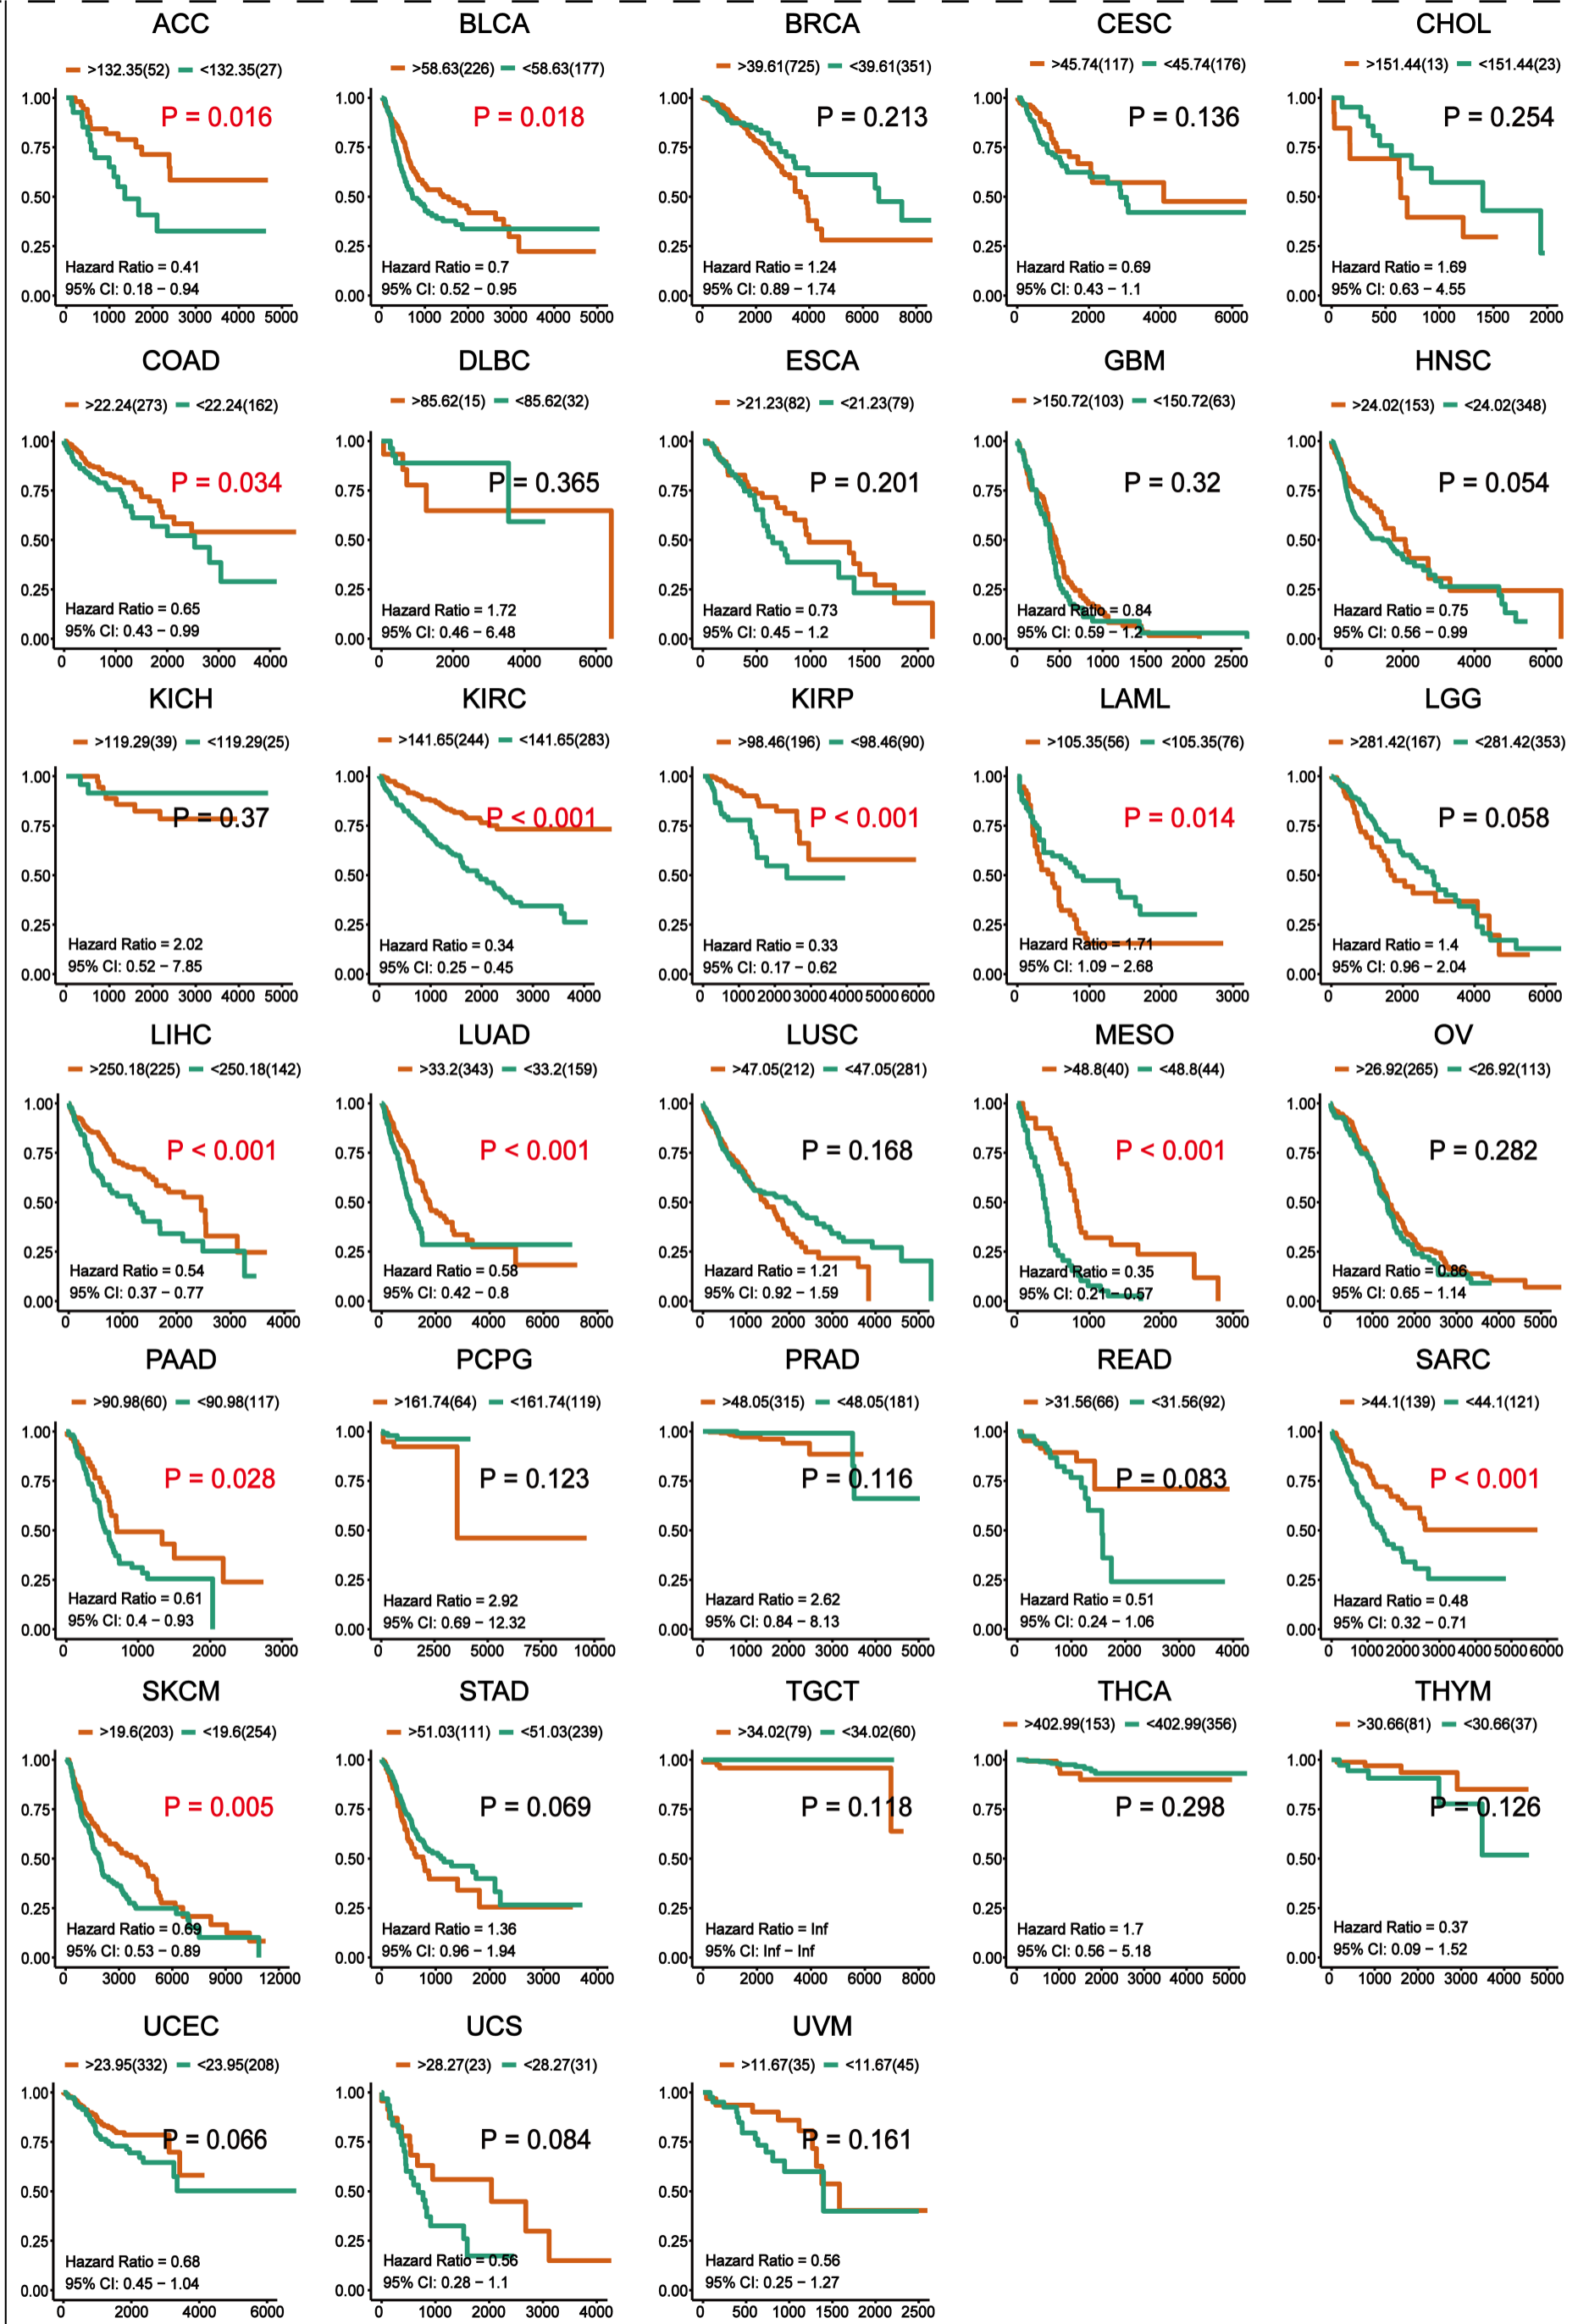

Supplement: Figure_S1.pdf [file Figure_S1.pdf]
