# Supplementary material for: Transcriptomic characterization revealed that METTL7A inhibits melanoma progression via the p53 signaling pathway and immunomodulatory pathway
Source: PeerJ journal article supplement (doi:10.7717/peerj.15799), 2023-08-02
Supplement: Raw_data_.zip [file Raw_data_.zip]

## Sheet: Sheet1
SKMEL28						siNC				si7A-1				si7A-2				si7A-3
0h	blank	0.162	0.176	0.169		2.22485	2.21893	2.27219	2.23866	1.88166	1.86391	1.88166	1.87574	1.84615	1.94083	1.94083	1.90927	2.08876	2.19527	2.19527	2.15976
	siNC	0.376	0.375	0.384		0.993833	0.991189	1.01498		1.00315	0.993691	1.00315		0.966942	1.01653	1.01653		0.967123	1.01644	1.01644
	si7A-1	0.318	0.315	0.318
	si7A-2	0.312	0.328	0.328
	si7A-3	0.353	0.371	0.371
24h	blank	0.178	0.174	0.176		4.42045	4.22159	4.19318		3.01705	2.88636	2.92614		3.65341	3.46591	3.38636		3.65341	3.74432	3.72159
	siNC	0.778	0.743	0.738		1.9746	1.88577	1.87308		1.60846	1.53879	1.55999		1.91351	1.81531	1.77364		1.69158	1.73367	1.72315
	si7A-1	0.531	0.508	0.515
	si7A-2	0.643	0.61	0.596
	si7A-3	0.643	0.659	0.655
48h	blank	0.175	0.187	0.181		6.77348	7.8011	7.48619		4.77901	4.9116	4.51381		6.07182	6.64641	6.12707		6.68508	6.49171	6.44751
	siNC	1.226	1.412	1.355		3.02569	3.48472	3.34405		2.5478	2.61849	2.40642		3.18018	3.48113	3.20912		3.09528	3.00575	2.98529
	si7A-1	0.865	0.889	0.817
	si7A-2	1.099	1.203	1.109
	si7A-3	1.21	1.175	1.167
72h	blank	0.179	0.175	0.177		12.9774	13.6045	13.4689		9.49718	9.29379	9.0791		12.5932	11.9718	12.4859		12.2994	12.0621	12.4068
	siNC	2.297	2.408	2.384		5.79695	6.07709	6.01652		5.06316	4.95473	4.84028		6.59583	6.27033	6.53961		5.69481	5.58494	5.74451
	si7A-1	1.681	1.645	1.607
	si7A-2	2.229	2.119	2.21
	si7A-3	2.177	2.135	2.196
96h	blank	0.196	0.195	0.1955		15.7494	15.4373	15.243		13.4834	13.0179	13.7136		15.1611	14.7928	15.9182		15.4834	15.3964	16.1995
	siNC	3.079	3.018	2.98		7.03518	6.8958	6.80897		7.1883	6.94014	7.31101		7.9408	7.7479	8.3373		7.16902	7.12875	7.50059
	si7A-1	2.636	2.545	2.681
	si7A-2	2.964	2.892	3.112
	si7A-3	3.027	3.01	3.167
