# Supplementary material for: Transcriptomic characterization revealed that METTL7A inhibits melanoma progression via the p53 signaling pathway and immunomodulatory pathway
Source: PeerJ. 2023 Aug 2;11:e15799. doi: 10.7717/peerj.15799 (PMC10404031; doi:10.7717/peerj.15799)
Supplement: Supplemental Information 5 [file peerj-11-15799-s005.xlsx]

## Sheet: TCGA_Clinical_SKCM
A0_Samples	A3_T	breslow_depth_value
TCGA-EE-A2A5	T2	1.1
TCGA-EE-A3J3	T2	0.98
TCGA-BF-A5EP	T4	70
TCGA-QB-AA9O	TX	Not Available
TCGA-EE-A3JH	T2	1.3
TCGA-D3-A3MV	T2	1.2
TCGA-EE-A29P	T4	4.5
TCGA-FW-A3I3		Not Available
TCGA-EB-A3HV	T4	13
TCGA-GN-A26A	T3	2.3
TCGA-D3-A51J	T0	Not Available
TCGA-W3-AA1Q	TX	Not Available
TCGA-EE-A3J7	T2	1.12
TCGA-WE-A8K4	T4	12
TCGA-FS-A1ZT	T2	1.15
TCGA-W3-AA1O	TX	Not Available
TCGA-EE-A2MD	T3	3
TCGA-D9-A149	TX	Not Available
TCGA-GN-A263	T4	Not Available
TCGA-GN-A264		7
TCGA-DA-A1HW	T1	0.7
TCGA-D3-A2JE	TX	Not Available
TCGA-FS-A1ZC	TX	Not Available
TCGA-D3-A8GJ	T3	2.4
TCGA-D3-A2JP	T0	Not Available
TCGA-BF-AAP8	T4	6
TCGA-EB-A82C	T4	10
TCGA-FS-A1ZS	T2	1.15
TCGA-EE-A29H	T1	1
TCGA-EB-A3Y6	T4	4.5
TCGA-DA-A1I2	T4	Not Available
TCGA-EE-A3AB	T0	Not Available
TCGA-D3-A3MU	T3	2.9
TCGA-FS-A1ZG	T4	6
TCGA-EB-A5VV	T3	4
TCGA-BF-A3DM	T2	1.5
TCGA-EB-A5FP	T4	8
TCGA-ER-A42H		Not Available
TCGA-ER-A19P		Not Available
TCGA-EE-A3AF	T0	Not Available
TCGA-D3-A2J9	T4	21
TCGA-EE-A185	T4	6
TCGA-EE-A29N	TX	Not Available
TCGA-EB-A3XD	T4	Not Available
TCGA-FR-A2OS	T4	Not Available
TCGA-EE-A3AA	T0	Not Available
TCGA-D3-A8GQ	T3	2.6
TCGA-DA-A3F2	T4	5.1
TCGA-EE-A2A6	T1	0.55
TCGA-BF-AAP1	T4	15
TCGA-FR-A8YC	T3	2.6
TCGA-EB-A42Z	T4	10
TCGA-EB-A4IS	T3	2.5
TCGA-EB-A553	T4	10
TCGA-FS-A1ZH	T3	3
TCGA-FS-A1ZY	T3	2.9
TCGA-D3-A2JC	T0	Not Available
TCGA-FR-A3R1	T4	6.3
TCGA-EE-A2GB	T2	1.65
TCGA-XV-AB01	T3	Not Available
TCGA-XV-A9W5	T2	2
TCGA-D3-A1Q8	T0	Not Available
TCGA-D3-A2JL	TX	Not Available
TCGA-YG-AA3O		Not Available
TCGA-DA-A1HY	T2	1.13
TCGA-EB-A5SF	T4	11
TCGA-ER-A19E	T2	1.1
TCGA-D3-A8GO	T2	1.2
TCGA-BF-A3DJ	T4	11
TCGA-D3-A1Q5	TX	Not Available
TCGA-FR-A7U8	TX	Not Available
TCGA-D9-A4Z3	T4	75
TCGA-DA-A95Z	TX	Not Available
TCGA-EB-A41B	T4	28
TCGA-EE-A2GI	T1	0.65
TCGA-Z2-A8RT	T3	4
TCGA-GF-A2C7	T4	Not Available
TCGA-EE-A29W	Tis	0
TCGA-D3-A5GR	T1	0.98
TCGA-EE-A29G	T4	7.4
TCGA-D3-A3CF	T4	9
TCGA-D3-A51H	T1	0.91
TCGA-DA-A1IC	T3	2.5
TCGA-WE-A8ZM	TX	Not Available
TCGA-D9-A3Z4	T4	12
TCGA-FS-A1YW	T1	1
TCGA-FS-A1Z3	TX	Not Available
TCGA-W3-AA21	T2	1.1
TCGA-EE-A17Z	T4	29
TCGA-GN-A265		Not Available
TCGA-D3-A3C3	TX	Not Available
TCGA-FS-A1ZQ	TX	Not Available
TCGA-D3-A2JA	T2	1.2
TCGA-HR-A5NC	T4	8
TCGA-EE-A2ML	T3	3
TCGA-EE-A2MC	T2	1
TCGA-GN-A26D	T4	12
TCGA-FW-A5DX	T4	7
TCGA-Z2-AA3S	T1	0.5
TCGA-EE-A29Q	T3	2.3
TCGA-WE-A8ZR	T4	7.3
TCGA-D3-A3C8	TX	Not Available
TCGA-BF-A1PZ	T4	8
TCGA-D3-A2J8	T2	1.4
TCGA-EB-A5SH	T4	5
TCGA-DA-A95W	TX	Not Available
TCGA-FS-A1Z0	T1	0.95
TCGA-EE-A2GP	T4	4.2
TCGA-EB-A430	T4	18
TCGA-GN-A266		Not Available
TCGA-BF-A1PU	T4	13
TCGA-FW-A3TU		Not Available
TCGA-DA-A1I8	T4	8
TCGA-D3-A1Q6	T4	50
TCGA-EB-A44R	TX	Not Available
TCGA-EE-A2MP	T2	1.05
TCGA-FR-A8YE	T1	0.79
TCGA-BF-AAP7	T4	5
TCGA-3N-A9WB	T1	0.7
TCGA-D3-A2JN	T0	Not Available
TCGA-EE-A3JI	T2	1.2
TCGA-D9-A1X3	T4	12
TCGA-WE-AAA3	T4	7
TCGA-D3-A2JF	T1	0.28
TCGA-FR-A3YN	T2	1.25
TCGA-EE-A2MG	T2	0.7
TCGA-D3-A8GI	T1	0.98
TCGA-D3-A1QB	T0	Not Available
TCGA-EE-A2MQ	T3	3.1
TCGA-ER-A2NC	T2	1.97
TCGA-D9-A1JW	T1	Not Available
TCGA-EE-A2GO	T3	3.4
TCGA-EE-A29X	T2	2
TCGA-EB-A24D	T4	36
TCGA-EB-A4P0	T4	8
TCGA-D3-A8GC	TX	Not Available
TCGA-EE-A2MN	T2	1
TCGA-ER-A3EV	T4	4.4
TCGA-DA-A1IA	T2	1.3
TCGA-FR-A8YD	T4	4.5
TCGA-DA-A960	T3	2.32
TCGA-ER-A3PL	T3	2.2
TCGA-EB-A4OY	T4	10
TCGA-GF-A6C8	T3	4
TCGA-ER-A3ET	T3	3.55
TCGA-FS-A4F9	T4	10
TCGA-D3-A2J6	T3	3.2
TCGA-OD-A75X	TX	Not Available
TCGA-ER-A19B	TX	Not Available
TCGA-BF-AAOU	T4	12
TCGA-D3-A2JK	T4	4.3
TCGA-FS-A1ZD	T2	1.18
TCGA-EE-A20H	T2	1.05
TCGA-EE-A3JE	T3	3.7
TCGA-EE-A2MK	T4	5.2
TCGA-EE-A2MF	T2	1.5
TCGA-D9-A3Z3	T3	3.9
TCGA-EB-A24C	T4	10
TCGA-D3-A1Q1	T1	0.4
TCGA-EB-A3XF	T4	10
TCGA-EE-A2GC	T3	2.3
TCGA-EE-A3AG	T0	Not Available
TCGA-WE-A8K1	T3	3
TCGA-EE-A17Y	T3	2.8
TCGA-EB-A51B	T4	10
TCGA-FW-A3TV	T1	0.5
TCGA-GF-A3OT	T3	Not Available
TCGA-D9-A1JX	TX	Not Available
TCGA-RP-A693	TX	Not Available
TCGA-D9-A4Z2	T4	25
TCGA-D9-A6EA	T4	6
TCGA-D3-A3CB	T2	1.75
TCGA-FR-A729	T1	0.25
TCGA-EB-A1NK	T4	8
TCGA-EB-A44Q	TX	Not Available
TCGA-BF-A3DN	T3	3
TCGA-BF-AAP6	T4	20
TCGA-EB-A6QY	T4	10
TCGA-WE-AA9Y	T2	1.4
TCGA-ER-A2NE	Tis	Not Available
TCGA-WE-A8JZ	T4	14
TCGA-FS-A4FD	T2	2
TCGA-EB-A6L9	TX	Not Available
TCGA-GN-A8LL	T4	5
TCGA-EE-A3JD	TX	Not Available
TCGA-LH-A9QB		Not Available
TCGA-DA-A1I5	T1	0.6
TCGA-FS-A1ZN	T4	8
TCGA-EE-A2A0	T3	2.2
TCGA-EE-A2GH	T2	0.8
TCGA-ER-A19M	T2	1.9
TCGA-GN-A4U5	T2	1.15
TCGA-EE-A2GD	T4	4.4
TCGA-EE-A181	T3	2.5
TCGA-XV-AAZY	T4	16
TCGA-ER-A199	T4	3
TCGA-D3-A5GS	T1	0.62
TCGA-FS-A4FC	T3	4
TCGA-D3-A5GT	T2	1.92
TCGA-ER-A2NB	T4	4.39
TCGA-EB-A299	T2	2
TCGA-EB-A44O	T4	5
TCGA-EE-A3AH	T3	3.7
TCGA-EB-A4IQ	T4	15
TCGA-FS-A4F2	T4	4.7
TCGA-FS-A4F8	T1	0.9
TCGA-D3-A2JH	T1	1
TCGA-RP-A6K9		Not Available
TCGA-EE-A17X	T1	0.8
TCGA-EE-A29C	T2	1.7
TCGA-EB-A57M	T4	8
TCGA-EE-A2MJ	T4	11
TCGA-ER-A19S		Not Available
TCGA-BF-A3DL	T3	3
TCGA-ER-A2NF	T3	4
TCGA-FS-A1ZM	T2	1.2
TCGA-D3-A2JG	T3	2.5
TCGA-GN-A262		3
TCGA-BF-AAP4	T4	15
TCGA-EE-A2MU	T1	0.5
TCGA-ER-A42K	T4	5.5
TCGA-EB-A44N	T4	5
TCGA-BF-A5ES	T4	8
TCGA-EE-A2GJ	T1	0.4
TCGA-EE-A20F	T1	0.5
TCGA-EE-A29E	T3	3.2
TCGA-DA-A95Y	T4	5.03
TCGA-EB-A3XE	T3	3
TCGA-EB-A550	T4	15
TCGA-EE-A2GM	T4	6.5
TCGA-GN-A4U9	T2	1.7
TCGA-D3-A8GN	TX	Not Available
TCGA-ER-A197	T4	8
TCGA-D3-A51K	Tis	0
TCGA-W3-A828	T3	0.5
TCGA-EE-A20I	TX	Not Available
TCGA-WE-A8ZQ	T3	2.3
TCGA-D3-A5GL	T2	1.6
TCGA-FS-A1ZJ	T2	1.22
TCGA-D9-A3Z1	T2	1.7
TCGA-ER-A193	T3	Not Available
TCGA-EB-A5SE	T3	4
TCGA-BF-A1Q0	T4	5
TCGA-W3-A824	T2	1.5
TCGA-EE-A3JB	T3	1.86
TCGA-EB-A5SG		Not Available
TCGA-GN-A8LN	T4	4.85
TCGA-GF-A4EO	T0	Not Available
TCGA-D3-A2JB	Tis	Not Available
TCGA-ER-A19A	TX	Not Available
TCGA-ER-A42L	T3	1.46
TCGA-EE-A2M5	T2	0.8
TCGA-XV-AAZW	T4	13
TCGA-GF-A6C9		Not Available
TCGA-D3-A3C6	T2	1.3
TCGA-FS-A1YY	T3	2.7
TCGA-XV-A9W2	T1	1
TCGA-ER-A2NH	T3	4
TCGA-EB-A3Y7	T3	4
TCGA-FR-A728	T4	12
TCGA-EB-A3XC	T4	Not Available
TCGA-D3-A8GD	T4	20
TCGA-WE-A8ZO	T3	2.4
TCGA-EE-A20B	T3	2.6
TCGA-D3-A8GS	T1	0.6
TCGA-D3-A3MR	T0	Not Available
TCGA-YG-AA3N	T4	17
TCGA-D3-A3MO	TX	Not Available
TCGA-EB-A41A	T4	7
TCGA-EE-A3J5	T4	4.8
TCGA-DA-A1I1	T0	Not Available
TCGA-FS-A1Z7	T4	17
TCGA-ER-A19N		Not Available
TCGA-EE-A2MT	T2	1.5
TCGA-GN-A9SD	T1	0.5
TCGA-FS-A1ZU	T4	8.4
TCGA-FS-A1ZW	T2	1.2
TCGA-D9-A148	TX	Not Available
TCGA-D3-A8GM	T3	3.8
TCGA-W3-AA1R	T3	Not Available
TCGA-FR-A726	T4	14
TCGA-QB-A6FS	T0	Not Available
TCGA-WE-A8ZX	TX	Not Available
TCGA-FW-A3R5	TX	Not Available
TCGA-YD-A9TB		1.5
TCGA-FR-A44A	T3	2.51
TCGA-EB-A5UN	T4	14
TCGA-ER-A194		4.5
TCGA-EE-A2GU	T1	0.3
TCGA-D3-A51G	Tis	0
TCGA-GN-A4U7	T2	1.39
TCGA-EB-A4OZ	T4	18
TCGA-EB-A4XL	T4	7
TCGA-FR-A69P	TX	Not Available
TCGA-FS-A1ZF	T4	4.3
TCGA-YG-AA3P	T4	10
TCGA-EE-A2M8	T3	2
TCGA-FS-A4F5	T2	1.48
TCGA-D3-A5GN	T1	0.6
TCGA-FS-A1ZE	T4	5
TCGA-ER-A19J	TX	Not Available
TCGA-WE-A8K6	TX	Not Available
TCGA-BF-AAOX	T4	11
TCGA-EE-A29M	T2	1.02
TCGA-WE-AAA0	T1	0.8
TCGA-EB-A431	T4	15
TCGA-EE-A3JA	T2	1.5
TCGA-EE-A3AC	T0	Not Available
TCGA-EE-A2GS	T2	1.8
TCGA-EB-A6R0	T4	10
TCGA-EE-A3J8	T4	4.8
TCGA-WE-A8ZN	T4	4.5
TCGA-EB-A3XB	T4	Not Available
TCGA-GN-A4U8		Not Available
TCGA-BF-AAP0	T4	Not Available
TCGA-D9-A6EC	T3	3
TCGA-ER-A198		10
TCGA-DA-A1I4	T3	3.4
TCGA-ER-A19F		6.7
TCGA-EE-A2GL	T3	3.1
TCGA-IH-A3EA	T4	Not Available
TCGA-EE-A182	T4	14
TCGA-BF-A5EQ	T4	5
TCGA-DA-A1HV	T0	Not Available
TCGA-D3-A8GL	T2	1.32
TCGA-EE-A2GN	T2	1.9
TCGA-D3-A3ML	T3	2.3
TCGA-EE-A2A1	T2	1.3
TCGA-D3-A2JO	TX	Not Available
TCGA-DA-A3F3	T0	Not Available
TCGA-EE-A3J4	T3	2
TCGA-ER-A19L		Not Available
TCGA-D3-A51N	T0	Not Available
TCGA-ER-A3ES		Not Available
TCGA-GF-A769	T4	74
TCGA-EB-A551	T4	10
TCGA-EE-A29L	T4	7
TCGA-DA-A1I7	T0	Not Available
TCGA-EE-A2MM	T2	0.6
TCGA-D9-A4Z6	T3	Not Available
TCGA-FR-A7UA	T2	1.02
TCGA-FS-A1ZP	T3	2.5
TCGA-DA-A1IB	T2	1.5
TCGA-ER-A19C	T2	0.75
TCGA-EB-A5UM	T4	5
TCGA-D3-A51T	T4	4.2
TCGA-EE-A2MR	T2	1.25
TCGA-BF-A5ER	T4	14
TCGA-ER-A196	T4	22
TCGA-EE-A20C	Tis	Not Available
TCGA-ER-A2NG	T3	3
TCGA-RP-A695	TX	Not Available
TCGA-EB-A97M	T4	15
TCGA-FS-A4F0	T4	14
TCGA-ER-A19G		1.6
TCGA-D3-A1Q7	T1	0.68
TCGA-GN-A267	T4	5.2
TCGA-EE-A29D	T3	3.2
TCGA-EB-A5KH	T0	Not Available
TCGA-W3-AA1V	T3	1.3
TCGA-D3-A8GK	T3	2.6
TCGA-W3-AA1W	T3	1.54
TCGA-EB-A82B	T4	20
TCGA-D3-A1Q9	T4	6
TCGA-BF-A1PX	T4	12
TCGA-FS-A1ZR	T2	2
TCGA-EE-A180	T4	4.9
TCGA-EE-A2GK	T1	0.8
TCGA-EE-A2ME	T2	0.52
TCGA-YD-A9TA		1.5
TCGA-FR-A3YO	T2	Not Available
TCGA-FS-A1Z4	T1	0.85
TCGA-BF-AAP2	T3	3
TCGA-D3-A8GR	Tis	0.01
TCGA-D3-A5GU	T1	0.48
TCGA-FS-A1ZA	T4	4.5
TCGA-DA-A95X	T2	1.45
TCGA-D3-A1Q3	T4	4.6
TCGA-D3-A51F	T4	7
TCGA-D3-A8GP	T2	1.8
TCGA-EE-A2MS	T3	1.8
TCGA-DA-A95V	T4	4.1
TCGA-D3-A8GE	TX	Not Available
TCGA-D3-A2JD	T4	18
TCGA-D3-A1Q4	T2	1.45
TCGA-GN-A268	T4	9.8
TCGA-3N-A9WD	T2	1.25
TCGA-EE-A2A2	T4	7
TCGA-WE-A8K5	T2	1.7
TCGA-EB-A6QZ	T3	3
TCGA-GN-A8LK	T1	0.7
TCGA-D3-A51E	T2	1.2
TCGA-EB-A44P	T4	Not Available
TCGA-D9-A6EG	T4	5
TCGA-EE-A29V	T3	3.5
TCGA-WE-A8ZY	T3	3
TCGA-FS-A1YX	T2	1.1
TCGA-BF-A5EO	T4	8
TCGA-ER-A19T	T4	15
TCGA-D3-A3CE	T0	Not Available
TCGA-D3-A5GO	T4	4.3
TCGA-EE-A2M6	T1	0.7
TCGA-EB-A5UL	TX	4
TCGA-D3-A3C7	T0	Not Available
TCGA-ER-A19K	T4	6.8
TCGA-D3-A1QA	T2	1.12
TCGA-ER-A19H		0.4
TCGA-DA-A3F8	T2	1.9
TCGA-FW-A5DY	T3	Not Available
TCGA-EE-A29S	T3	2.5
TCGA-ER-A1A1	TX	Not Available
TCGA-EE-A2GT	T3	2.2
TCGA-FS-A4FB	T2	2
TCGA-YD-A89C	T1	1
TCGA-ER-A19W		0.75
TCGA-XV-AAZV	T4	10
TCGA-BF-A9VF	T4	12
TCGA-HR-A2OH	T3	3.4
TCGA-EE-A184	T2	1.95
TCGA-EE-A29A	T3	2.3
TCGA-D3-A3C1	TX	Not Available
TCGA-EE-A3AD	T0	Not Available
TCGA-EB-A5VU	T4	15
TCGA-D3-A8GB	T3	3.5
TCGA-DA-A3F5	T1	0.4
TCGA-D3-A51R	T3	2.5
TCGA-ER-A19D	T2	1.75
TCGA-DA-A1I0	T4	4.5
TCGA-EB-A42Y	T4	5
TCGA-D3-A2J7	T3	3.6
TCGA-EE-A29R	T3	3.5
TCGA-W3-A825	T3	1.3
TCGA-BF-A1PV	T4	9
TCGA-WE-A8ZT	T3	4
TCGA-3N-A9WC	T2	1.8
TCGA-EE-A29T	TX	Not Available
TCGA-FS-A4F4	T3	2
TCGA-EE-A29B	T3	4
TCGA-EE-A2GE	T2	0.9
TCGA-HR-A2OG		Not Available
TCGA-WE-AAA4	TX	Not Available
TCGA-D3-A3BZ	T4	4.6
TCGA-Z2-AA3V	T1	0.5
TCGA-EE-A2GR	T4	6.9
TCGA-GN-A4U3	T3	3
TCGA-D3-A8GV	TX	Not Available
TCGA-ER-A19O	T3	Not Available
TCGA-FS-A1ZB	T3	3
TCGA-D9-A4Z5	T4	Not Available
TCGA-EE-A2M7	T3	2.2
TCGA-FS-A1ZZ	T3	3.8
TCGA-EE-A2MI	T4	0.4
TCGA-FR-A7U9	T3	2.8
TCGA-ER-A19Q		1.2
TCGA-EB-A85I	T4	10
TCGA-EB-A85J	T4	5.5
TCGA-XV-A9VZ	T4	5
TCGA-EE-A183	Tis	Not Available
TCGA-RP-A694	TX	Not Available
TCGA-RP-A690		Not Available
TCGA-GN-A26C	T4	14
TCGA-ER-A2ND	T1	1
TCGA-D3-A3CC	T4	7.2
TCGA-FS-A1ZK	T4	5
TCGA-D9-A6E9	T3	4
TCGA-ER-A195	TX	Not Available
TCGA-EE-A2MH	T4	3.4
TCGA-GN-A4U4	T2	1.7

## Sheet: GSE65904
Sample	time	event
GSM1608593	distant metastasis free survival in days: 1714	distant metastasis free survival (1=death, 0=alive): 0
GSM1608595	distant metastasis free survival in days: 2127	distant metastasis free survival (1=death, 0=alive): 0
GSM1608596	distant metastasis free survival in days: 1442	distant metastasis free survival (1=death, 0=alive): 0
GSM1608598	distant metastasis free survival in days: 2631	distant metastasis free survival (1=death, 0=alive): 0
GSM1608599	distant metastasis free survival in days: 292	distant metastasis free survival (1=death, 0=alive): 1
GSM1608600	distant metastasis free survival in days: 1310	distant metastasis free survival (1=death, 0=alive): 0
GSM1608601	distant metastasis free survival in days: 817	distant metastasis free survival (1=death, 0=alive): 0
GSM1608602	distant metastasis free survival in days: 1401	distant metastasis free survival (1=death, 0=alive): 1
GSM1608603	distant metastasis free survival in days: 101	distant metastasis free survival (1=death, 0=alive): 0
GSM1608604	distant metastasis free survival in days: 2368	distant metastasis free survival (1=death, 0=alive): 1
GSM1608605	distant metastasis free survival in days: 502	distant metastasis free survival (1=death, 0=alive): 1
GSM1608606	distant metastasis free survival in days: 792	distant metastasis free survival (1=death, 0=alive): 1
GSM1608607	distant metastasis free survival in days: 1101	distant metastasis free survival (1=death, 0=alive): 0
GSM1608608	distant metastasis free survival in days: 75	distant metastasis free survival (1=death, 0=alive): 0
GSM1608610	distant metastasis free survival in days: 1099	distant metastasis free survival (1=death, 0=alive): 1
GSM1608611	distant metastasis free survival in days: 65	distant metastasis free survival (1=death, 0=alive): 1
GSM1608612	distant metastasis free survival in days: 370	distant metastasis free survival (1=death, 0=alive): 1
GSM1608613	distant metastasis free survival in days: 171	distant metastasis free survival (1=death, 0=alive): 0
GSM1608615	distant metastasis free survival in days: 1266	distant metastasis free survival (1=death, 0=alive): 0
GSM1608616	distant metastasis free survival in days: 6343	distant metastasis free survival (1=death, 0=alive): 0
GSM1608617	distant metastasis free survival in days: 820	distant metastasis free survival (1=death, 0=alive): 0
GSM1608620	distant metastasis free survival in days: 372	distant metastasis free survival (1=death, 0=alive): 1
GSM1608621	distant metastasis free survival in days: 1220	distant metastasis free survival (1=death, 0=alive): 0
GSM1608622	distant metastasis free survival in days: 559	distant metastasis free survival (1=death, 0=alive): 0
GSM1608623	distant metastasis free survival in days: 374	distant metastasis free survival (1=death, 0=alive): 1
GSM1608625	distant metastasis free survival in days: 3206	distant metastasis free survival (1=death, 0=alive): 0
GSM1608626	distant metastasis free survival in days: 875	distant metastasis free survival (1=death, 0=alive): 1
GSM1608627	distant metastasis free survival in days: 293	distant metastasis free survival (1=death, 0=alive): 1
GSM1608628	distant metastasis free survival in days: 387	distant metastasis free survival (1=death, 0=alive): 1
GSM1608630	distant metastasis free survival in days: 655	distant metastasis free survival (1=death, 0=alive): 1
GSM1608634	distant metastasis free survival in days: 267	distant metastasis free survival (1=death, 0=alive): 0
GSM1608635	distant metastasis free survival in days: 162	distant metastasis free survival (1=death, 0=alive): 1
GSM1608637	distant metastasis free survival in days: 97	distant metastasis free survival (1=death, 0=alive): 1
GSM1608638	distant metastasis free survival in days: 451	distant metastasis free survival (1=death, 0=alive): 0
GSM1608639	distant metastasis free survival in days: 3779	distant metastasis free survival (1=death, 0=alive): 0
GSM1608641	distant metastasis free survival in days: 229	distant metastasis free survival (1=death, 0=alive): 1
GSM1608642	distant metastasis free survival in days: 1260	distant metastasis free survival (1=death, 0=alive): 0
GSM1608643	distant metastasis free survival in days: 561	distant metastasis free survival (1=death, 0=alive): 1
GSM1608644	distant metastasis free survival in days: 22	distant metastasis free survival (1=death, 0=alive): 0
GSM1608645	distant metastasis free survival in days: 421	distant metastasis free survival (1=death, 0=alive): 1
GSM1608646	distant metastasis free survival in days: 105	distant metastasis free survival (1=death, 0=alive): 0
GSM1608648	distant metastasis free survival in days: 727	distant metastasis free survival (1=death, 0=alive): 1
GSM1608650	distant metastasis free survival in days: 2312	distant metastasis free survival (1=death, 0=alive): 1
GSM1608651	distant metastasis free survival in days: 6	distant metastasis free survival (1=death, 0=alive): 1
GSM1608652	distant metastasis free survival in days: 3185	distant metastasis free survival (1=death, 0=alive): 0
GSM1608653	distant metastasis free survival in days: 153	distant metastasis free survival (1=death, 0=alive): 1
GSM1608654	distant metastasis free survival in days: 207	distant metastasis free survival (1=death, 0=alive): 1
GSM1608655	distant metastasis free survival in days: 3315	distant metastasis free survival (1=death, 0=alive): 0
GSM1608657	distant metastasis free survival in days: 3582	distant metastasis free survival (1=death, 0=alive): 0
GSM1608658	distant metastasis free survival in days: 79	distant metastasis free survival (1=death, 0=alive): 1
GSM1608659	distant metastasis free survival in days: 731	distant metastasis free survival (1=death, 0=alive): 0
GSM1608660	distant metastasis free survival in days: 875	distant metastasis free survival (1=death, 0=alive): 0
GSM1608662	distant metastasis free survival in days: 280	distant metastasis free survival (1=death, 0=alive): 1
GSM1608663	distant metastasis free survival in days: 331	distant metastasis free survival (1=death, 0=alive): 1
GSM1608664	distant metastasis free survival in days: 1406	distant metastasis free survival (1=death, 0=alive): 0
GSM1608665	distant metastasis free survival in days: 1143	distant metastasis free survival (1=death, 0=alive): 1
GSM1608666	distant metastasis free survival in days: 1172	distant metastasis free survival (1=death, 0=alive): 0
GSM1608667	distant metastasis free survival in days: 164	distant metastasis free survival (1=death, 0=alive): 0
GSM1608668	distant metastasis free survival in days: 312	distant metastasis free survival (1=death, 0=alive): 1
GSM1608669	distant metastasis free survival in days: 282	distant metastasis free survival (1=death, 0=alive): 1
GSM1608671	distant metastasis free survival in days: 21	distant metastasis free survival (1=death, 0=alive): 1
GSM1608672	distant metastasis free survival in days: 5530	distant metastasis free survival (1=death, 0=alive): 0
GSM1608673	distant metastasis free survival in days: 6097	distant metastasis free survival (1=death, 0=alive): 0
GSM1608674	distant metastasis free survival in days: 1312	distant metastasis free survival (1=death, 0=alive): 0
GSM1608675	distant metastasis free survival in days: 58	distant metastasis free survival (1=death, 0=alive): 1
GSM1608676	distant metastasis free survival in days: 249	distant metastasis free survival (1=death, 0=alive): 1
GSM1608677	distant metastasis free survival in days: 338	distant metastasis free survival (1=death, 0=alive): 1
GSM1608678	distant metastasis free survival in days: 6453	distant metastasis free survival (1=death, 0=alive): 0
GSM1608679	distant metastasis free survival in days: 1313	distant metastasis free survival (1=death, 0=alive): 0
GSM1608681	distant metastasis free survival in days: 1112	distant metastasis free survival (1=death, 0=alive): 0
GSM1608684	distant metastasis free survival in days: 734	distant metastasis free survival (1=death, 0=alive): 0
GSM1608687	distant metastasis free survival in days: 185	distant metastasis free survival (1=death, 0=alive): 1
GSM1608689	distant metastasis free survival in days: 13	distant metastasis free survival (1=death, 0=alive): 1
GSM1608690	distant metastasis free survival in days: 338	distant metastasis free survival (1=death, 0=alive): 1
GSM1608692	distant metastasis free survival in days: 424	distant metastasis free survival (1=death, 0=alive): 0
GSM1608693	distant metastasis free survival in days: 574	distant metastasis free survival (1=death, 0=alive): 1
GSM1608694	distant metastasis free survival in days: 161	distant metastasis free survival (1=death, 0=alive): 1
GSM1608695	distant metastasis free survival in days: 5632	distant metastasis free survival (1=death, 0=alive): 0
GSM1608696	distant metastasis free survival in days: 1429	distant metastasis free survival (1=death, 0=alive): 0
GSM1608697	distant metastasis free survival in days: 145	distant metastasis free survival (1=death, 0=alive): 1
GSM1608698	distant metastasis free survival in days: 333	distant metastasis free survival (1=death, 0=alive): 0
GSM1608700	distant metastasis free survival in days: 379	distant metastasis free survival (1=death, 0=alive): 1
GSM1608701	distant metastasis free survival in days: 170	distant metastasis free survival (1=death, 0=alive): 0
GSM1608702	distant metastasis free survival in days: 295	distant metastasis free survival (1=death, 0=alive): 1
GSM1608703	distant metastasis free survival in days: 2239	distant metastasis free survival (1=death, 0=alive): 0
GSM1608705	distant metastasis free survival in days: 2319	distant metastasis free survival (1=death, 0=alive): 0
GSM1608706	distant metastasis free survival in days: 40	distant metastasis free survival (1=death, 0=alive): 1
GSM1608707	distant metastasis free survival in days: 229	distant metastasis free survival (1=death, 0=alive): 1
GSM1608708	distant metastasis free survival in days: 69	distant metastasis free survival (1=death, 0=alive): 1
GSM1608709	distant metastasis free survival in days: 897	distant metastasis free survival (1=death, 0=alive): 1
GSM1608713	distant metastasis free survival in days: 469	distant metastasis free survival (1=death, 0=alive): 1
GSM1608714	distant metastasis free survival in days: 5005	distant metastasis free survival (1=death, 0=alive): 0
GSM1608715	distant metastasis free survival in days: 186	distant metastasis free survival (1=death, 0=alive): 0
GSM1608716	distant metastasis free survival in days: 73	distant metastasis free survival (1=death, 0=alive): 1
GSM1608717	distant metastasis free survival in days: 405	distant metastasis free survival (1=death, 0=alive): 1
GSM1608718	distant metastasis free survival in days: 160	distant metastasis free survival (1=death, 0=alive): 1
GSM1608719	distant metastasis free survival in days: 307	distant metastasis free survival (1=death, 0=alive): 0
GSM1608720	distant metastasis free survival in days: 4450	distant metastasis free survival (1=death, 0=alive): 1
GSM1608722	distant metastasis free survival in days: 727	distant metastasis free survival (1=death, 0=alive): 1
GSM1608723	distant metastasis free survival in days: 288	distant metastasis free survival (1=death, 0=alive): 1
GSM1608724	distant metastasis free survival in days: 20	distant metastasis free survival (1=death, 0=alive): 1
GSM1608727	distant metastasis free survival in days: 235	distant metastasis free survival (1=death, 0=alive): 1
GSM1608728	distant metastasis free survival in days: 1912	distant metastasis free survival (1=death, 0=alive): 0
GSM1608729	distant metastasis free survival in days: 354	distant metastasis free survival (1=death, 0=alive): 1
GSM1608732	distant metastasis free survival in days: 461	distant metastasis free survival (1=death, 0=alive): 1
GSM1608734	distant metastasis free survival in days: 116	distant metastasis free survival (1=death, 0=alive): 1
GSM1608735	distant metastasis free survival in days: 56	distant metastasis free survival (1=death, 0=alive): 1
GSM1608737	distant metastasis free survival in days: 476	distant metastasis free survival (1=death, 0=alive): 1
GSM1608741	distant metastasis free survival in days: 43	distant metastasis free survival (1=death, 0=alive): 0
GSM1608746	distant metastasis free survival in days: 110	distant metastasis free survival (1=death, 0=alive): 1
GSM1608747	distant metastasis free survival in days: 678	distant metastasis free survival (1=death, 0=alive): 0
GSM1608748	distant metastasis free survival in days: 324	distant metastasis free survival (1=death, 0=alive): 0
GSM1608750	distant metastasis free survival in days: 647	distant metastasis free survival (1=death, 0=alive): 0
GSM1608751	distant metastasis free survival in days: 235	distant metastasis free survival (1=death, 0=alive): 1
GSM1608752	distant metastasis free survival in days: 252	distant metastasis free survival (1=death, 0=alive): 0
GSM1608753	distant metastasis free survival in days: 357	distant metastasis free survival (1=death, 0=alive): 1
GSM1608754	distant metastasis free survival in days: 155	distant metastasis free survival (1=death, 0=alive): 1
GSM1608755	distant metastasis free survival in days: 114	distant metastasis free survival (1=death, 0=alive): 1
GSM1608756	distant metastasis free survival in days: 861	distant metastasis free survival (1=death, 0=alive): 0
GSM1608757	distant metastasis free survival in days: 1779	distant metastasis free survival (1=death, 0=alive): 0
GSM1608758	distant metastasis free survival in days: 1897	distant metastasis free survival (1=death, 0=alive): 1
GSM1608760	distant metastasis free survival in days: 18	distant metastasis free survival (1=death, 0=alive): 1
GSM1608761	distant metastasis free survival in days: 177	distant metastasis free survival (1=death, 0=alive): 1
GSM1608763	distant metastasis free survival in days: 811	distant metastasis free survival (1=death, 0=alive): 1
GSM1608764	distant metastasis free survival in days: 2800	distant metastasis free survival (1=death, 0=alive): 0
GSM1608768	distant metastasis free survival in days: 1035	distant metastasis free survival (1=death, 0=alive): 0
GSM1608769	distant metastasis free survival in days: 194	distant metastasis free survival (1=death, 0=alive): 0
GSM1608770	distant metastasis free survival in days: 3363	distant metastasis free survival (1=death, 0=alive): 0
GSM1608771	distant metastasis free survival in days: 15	distant metastasis free survival (1=death, 0=alive): 1
GSM1608772	distant metastasis free survival in days: 222	distant metastasis free survival (1=death, 0=alive): 1
GSM1608773	distant metastasis free survival in days: 511	distant metastasis free survival (1=death, 0=alive): 0
GSM1608777	distant metastasis free survival in days: 394	distant metastasis free survival (1=death, 0=alive): 1
GSM1608778	distant metastasis free survival in days: 344	distant metastasis free survival (1=death, 0=alive): 1
GSM1608782	distant metastasis free survival in days: 1479	distant metastasis free survival (1=death, 0=alive): 0
GSM1608784	distant metastasis free survival in days: 174	distant metastasis free survival (1=death, 0=alive): 0
GSM1608785	distant metastasis free survival in days: 498	distant metastasis free survival (1=death, 0=alive): 1
GSM1608786	distant metastasis free survival in days: 1208	distant metastasis free survival (1=death, 0=alive): 1
GSM1608787	distant metastasis free survival in days: 685	distant metastasis free survival (1=death, 0=alive): 0
GSM1608789	distant metastasis free survival in days: 594	distant metastasis free survival (1=death, 0=alive): 1
GSM1608790	distant metastasis free survival in days: 532	distant metastasis free survival (1=death, 0=alive): 1
GSM1608792	distant metastasis free survival in days: 336	distant metastasis free survival (1=death, 0=alive): 1
GSM1608793	distant metastasis free survival in days: 1784	distant metastasis free survival (1=death, 0=alive): 0
GSM1608794	distant metastasis free survival in days: 147	distant metastasis free survival (1=death, 0=alive): 1
GSM1608795	distant metastasis free survival in days: 1379	distant metastasis free survival (1=death, 0=alive): 0
GSM1608798	distant metastasis free survival in days: 207	distant metastasis free survival (1=death, 0=alive): 1
GSM1608799	distant metastasis free survival in days: 2890	distant metastasis free survival (1=death, 0=alive): 0
GSM1608801	distant metastasis free survival in days: 135	distant metastasis free survival (1=death, 0=alive): 1
GSM1608803	distant metastasis free survival in days: 66	distant metastasis free survival (1=death, 0=alive): 1
GSM1608805	distant metastasis free survival in days: 140	distant metastasis free survival (1=death, 0=alive): 1
GSM1608806	distant metastasis free survival in days: 1491	distant metastasis free survival (1=death, 0=alive): 0

## Sheet: ICGC_SKCM
icgc_donor_id	project_code	study_donor_involved_in	submitted_donor_id	donor_sex	donor_vital_status	disease_status_last_followup	donor_relapse_type	donor_age_at_diagnosis	donor_age_at_enrollment	donor_age_at_last_followup	donor_relapse_interval	donor_diagnosis_icd10	donor_tumour_staging_system_at_diagnosis	donor_tumour_stage_at_diagnosis	donor_tumour_stage_at_diagnosis_supplemental	donor_survival_time	donor_interval_of_last_followup	prior_malignancy	cancer_type_prior_malignancy	cancer_history_first_degree_relative
DO37659	SKCM-US	PCAWG	TCGA-DA-A1HV	female	alive	complete remission		75		75		C77.9					26	unknown		unknown
DO37655	SKCM-US		TCGA-DA-A1I4	male	alive	progression		51		53		C44.9					823	unknown		unknown
DO37651	SKCM-US		TCGA-FS-A1ZR	male	deceased			36		36		C77.9				347		unknown		unknown
DO37667	SKCM-US		TCGA-IH-A3EA	male	alive	progression		61		62		C44.4					524	unknown		unknown
DO37663	SKCM-US		TCGA-FS-A1YX	female	deceased			39		39		C49.9				1478		unknown		unknown
DO37639	SKCM-US		TCGA-EE-A2GU	female	alive	complete remission		65		70		C77.4					2043	unknown		unknown
DO37635	SKCM-US		TCGA-FS-A1Z3	female	deceased			72		72		C44.9				636		unknown		unknown
DO37631	SKCM-US		TCGA-EE-A3AC	male	alive	complete remission		47		49		C77.3					786	unknown		unknown
DO37647	SKCM-US		TCGA-EB-A3HV	male	alive	progression		37		37		C44.9					39	unknown		unknown
DO37643	SKCM-US		TCGA-EE-A2GH	male	alive	complete remission		34		49		C77.3					5536	unknown		unknown
DO37619	SKCM-US		TCGA-D3-A2JK	male	deceased			24		24		C77.3				368		unknown		unknown
DO37615	SKCM-US		TCGA-FS-A4F2	female	deceased			46		46		C49.9				1525		unknown		unknown
DO37611	SKCM-US		TCGA-EB-A41B	female	alive	complete remission		76		76		C44.6					3	unknown		unknown
DO37627	SKCM-US	PCAWG	TCGA-FS-A1ZD	male	deceased			63		63		C77.9				1628		unknown		unknown
DO37623	SKCM-US		TCGA-D9-A3Z4	male	alive	complete remission		54		54		C44.6					119	unknown		unknown
DO37607	SKCM-US	PCAWG	TCGA-DA-A3F3	male	alive	progression		52		52		C77.0					151	unknown		unknown
DO37603	SKCM-US		TCGA-EE-A2GD	female	alive	progression		58		84		C49.2					9568	unknown		unknown
DO37699	SKCM-US		TCGA-FS-A4FD	male	alive	progression		39		45		C77.9					2369	unknown		unknown
DO37695	SKCM-US		TCGA-EB-A1NK	male	alive	complete remission		48		48		C44.9					16	unknown		unknown
DO37679	SKCM-US		TCGA-ER-A19F	male	deceased			82		82		C44.6				802		unknown		unknown
DO37675	SKCM-US		TCGA-D3-A3CF	female	deceased			61		61		C77.4				746		unknown		unknown
DO37671	SKCM-US		TCGA-EB-A431	male	alive	complete remission		34		34		C44.9					52	unknown		unknown
DO37691	SKCM-US		TCGA-EB-A42Y	female	alive	complete remission		73		73		C44.6					6	unknown		unknown
DO37687	SKCM-US		TCGA-EB-A4IQ	female	alive	complete remission		42		42		C44.5					4	unknown		unknown
DO37683	SKCM-US		TCGA-DA-A3F2	male	alive	complete remission		55		55		C49.6					287	unknown		unknown
DO37539	SKCM-US		TCGA-EE-A2MH	male	deceased			66		66		C77.3				516		unknown		unknown
DO37535	SKCM-US		TCGA-EE-A29H	female	alive	complete remission		59		61		C77.3					979	unknown		unknown
DO37531	SKCM-US	PCAWG	TCGA-EE-A2MI	male	deceased			43		43		C77.3				6225		unknown		unknown
DO37547	SKCM-US		TCGA-EE-A20B	female	alive	complete remission		66		75		C44.7					3335	unknown		unknown
DO37543	SKCM-US		TCGA-D3-A2JD	male	deceased			58		58		C77.3				361		unknown		unknown
DO37519	SKCM-US		TCGA-FS-A1ZW	male	alive	complete remission		65		69		C77.9					1505	unknown		unknown
DO37515	SKCM-US	PCAWG	TCGA-GN-A262	female	alive	progression		47		57		C44.5					3664	unknown		unknown
DO37511	SKCM-US		TCGA-HR-A2OG	female	alive	complete remission		50		50		C44.6					7	unknown		unknown
DO37527	SKCM-US	PCAWG	TCGA-GN-A264	male	deceased			60		60		C44.5				3587		unknown		unknown
DO37523	SKCM-US		TCGA-FS-A1ZG	female	deceased			60		60		C77.9				295		unknown		unknown
DO37507	SKCM-US		TCGA-D3-A3C6	female	deceased			54		54		C77.4				1766		unknown		unknown
DO37503	SKCM-US		TCGA-FW-A3I3	female	alive	complete remission		59		59		C52					6	unknown		unknown
DO37599	SKCM-US	PCAWG	TCGA-EE-A185	female	deceased			55		55		C44.5				151		unknown		unknown
DO37595	SKCM-US		TCGA-EE-A29X	female	deceased			58		58		C49.0				545		unknown		unknown
DO37579	SKCM-US		TCGA-EB-A3XC	male	alive	progression		74		74		C44.9					9	unknown		unknown
DO37575	SKCM-US		TCGA-FS-A1ZH	female	deceased			71		71		C77.9				996		unknown		unknown
DO37571	SKCM-US		TCGA-EE-A3AA	male	alive	complete remission		47		57		C77.3					3781	unknown		unknown
DO37591	SKCM-US		TCGA-EE-A2A6	male	alive	complete remission		43		47		C77.4					1787	unknown		unknown
DO37587	SKCM-US	PCAWG	TCGA-ER-A19L	male	deceased			35		35		C49.5				4000		unknown		unknown
DO37583	SKCM-US		TCGA-EE-A2A2	male	alive	complete remission		71		73		C77.3					743	unknown		unknown
DO37559	SKCM-US		TCGA-EE-A2MC	male	deceased			73		73		C77.3				1871		unknown		unknown
DO37555	SKCM-US		TCGA-EE-A2GM	female	alive	complete remission		70		76		C49.6					2296	unknown		unknown
DO37551	SKCM-US		TCGA-FS-A1ZA	female	deceased			45		45		C77.9				843		unknown		unknown
DO37567	SKCM-US		TCGA-EE-A2MS	male	alive	complete remission		72		83		C77.3					4151	unknown		unknown
DO37563	SKCM-US		TCGA-D9-A3Z3	female	alive	complete remission		39		39		C77.3					99	unknown		unknown
DO48550	SKCM-US		TCGA-FR-A728	female	alive	progression		54		54		C44.6					247	unknown		unknown
DO37896	SKCM-US	PCAWG	TCGA-EE-A2GN	male	alive	complete remission		67		74		C49.3					2767	unknown		unknown
DO37891	SKCM-US		TCGA-FS-A4F0	female	alive	complete remission		67		73		C49.9					2367	unknown		unknown
DO48546	SKCM-US		TCGA-FR-A7U9	female	alive	progression		63		63		C77.4					213	unknown		unknown
DO37876	SKCM-US		TCGA-FR-A2OS	female	deceased			49		49		C44.7				368		unknown		unknown
DO37871	SKCM-US		TCGA-EB-A3XD	female	alive	complete remission		53		53		C44.9					0	unknown		unknown
DO37886	SKCM-US		TCGA-FS-A1ZB	male	deceased			57		57		C77.9				1486		unknown		unknown
DO37881	SKCM-US		TCGA-FS-A4F5	female	deceased			77		77		C49.9				874		unknown		unknown
DO37856	SKCM-US		TCGA-EB-A3XB	male	alive	complete remission		63		63		C44.9					36	unknown		unknown
DO37851	SKCM-US		TCGA-EE-A2MD	male	deceased			52		52		C77.5				1438		unknown		unknown
DO37866	SKCM-US		TCGA-EE-A29Q	female	alive	complete remission		70		73		C49.1					1136	unknown		unknown
DO37861	SKCM-US	PCAWG	TCGA-GN-A26A	female	deceased			63		63		C44.5				988		unknown		unknown
DO37839	SKCM-US		TCGA-EE-A2GC	male	alive	complete remission		82		85		C77.0					1316	unknown		unknown
DO37835	SKCM-US		TCGA-EE-A29L	male	deceased			78		78		C77.3				79		unknown		unknown
DO37831	SKCM-US		TCGA-EE-A29E	male	alive	complete remission		54		57		C77.3					1205	unknown		unknown
DO37847	SKCM-US		TCGA-EE-A2M7	male	deceased			66		66		C77.3				877		unknown		unknown
DO37843	SKCM-US		TCGA-FS-A1ZE	male	alive	complete remission		40		43		C44.9					1225	unknown		unknown
DO47299	SKCM-US		TCGA-ER-A19H	male	deceased			40		40		C49.3				4634		unknown		unknown
DO47295	SKCM-US		TCGA-EB-A5SE	male	alive			73		73		C44.5					0	unknown		unknown
DO47288	SKCM-US		TCGA-GF-A3OT	female	alive	progression		58		58		C77.3					301	unknown		unknown
DO47284	SKCM-US		TCGA-ER-A19G	female	alive	complete remission		48		70		C44.5					8180	unknown		unknown
DO47292	SKCM-US		TCGA-FR-A69P	female	alive			34		34		C77.4					149	unknown		unknown
DO47278	SKCM-US		TCGA-D3-A2JL	female	alive	complete remission		43		56		C77.4					4757	unknown		unknown
DO47274	SKCM-US		TCGA-D3-A51N	female	alive	complete remission		56		56		C77.4					305	unknown		unknown
DO47276	SKCM-US		TCGA-EE-A3J8	male	deceased			59		59		C49.3				1044		unknown		unknown
DO47281	SKCM-US		TCGA-EB-A4IS	male	alive	complete remission		77		77		C44.5					0	unknown		unknown
DO47282	SKCM-US		TCGA-EB-A5UM	female	alive	complete remission		48		48		C44.5					0	unknown		unknown
DO47267	SKCM-US		TCGA-EB-A5UN	male	alive			49		52		C17.9					1182	unknown		unknown
DO48597	SKCM-US		TCGA-ER-A3EV	male	deceased			55		55		C77.9				1429		unknown		unknown
DO47268	SKCM-US	PCAWG	TCGA-EE-A3JI	male	alive	progression		48		60		C77.3					4504	unknown		unknown
DO47263	SKCM-US		TCGA-D3-A2JH	male	alive	complete remission		68		70		C49.6					952	unknown		unknown
DO47265	SKCM-US		TCGA-EB-A550	female	alive	complete remission		75		75		C44.5					6	unknown		unknown
DO47270	SKCM-US		TCGA-EB-A5VV	female	alive			74		74		C77.4					193	unknown		unknown
DO47272	SKCM-US		TCGA-EB-A44O	male	alive	complete remission		69		69		C44.5					5	unknown		unknown
DO47259	SKCM-US		TCGA-EB-A57M	male	alive	complete remission		56		56		C44.7					8	unknown		unknown
DO47256	SKCM-US		TCGA-D3-A3MR	male	alive	complete remission		42		49		C49.9					2724	unknown		unknown
DO47255	SKCM-US	PCAWG	TCGA-EE-A29B	male	alive	progression		67		73		C44.7					2452	unknown		unknown
DO47257	SKCM-US		TCGA-FW-A5DY	female	alive	complete remission		48		48		C77.3					73	unknown		unknown
DO47254	SKCM-US		TCGA-EE-A20I	male	deceased			79		79		C44.7				412		unknown		unknown
DO47253	SKCM-US		TCGA-FW-A5DX	male	alive	complete remission		71		71		C44.5					59	unknown		unknown
DO47261	SKCM-US		TCGA-EB-A4OY	female	alive	complete remission		65		65		C44.7					-2	unknown		unknown
DO37819	SKCM-US		TCGA-EE-A2MR	male	alive	complete remission		61		69		C77.3					3150	unknown		unknown
DO37818	SKCM-US		TCGA-EE-A2MP	female	alive	progression		34		54		C77.4					7563	unknown		unknown
DO37814	SKCM-US		TCGA-EE-A182	female	deceased			84		84		C49.2				447		unknown		unknown
DO37810	SKCM-US		TCGA-EE-A2MQ	female	deceased			70		70		C77.3				1315		unknown		unknown
DO37827	SKCM-US	PCAWG	TCGA-D3-A1Q5	male	deceased			60		60		C77.9				3424		unknown		unknown
DO37823	SKCM-US		TCGA-EE-A2GO	female	alive	complete remission		66		74		C49.2					3101	unknown		unknown
DO37806	SKCM-US		TCGA-FS-A1ZS	male	alive	progression		54		66		C77.9					4526	unknown		unknown
DO37802	SKCM-US		TCGA-EE-A3AE	female	alive	complete remission		52		54		C77.4					813	unknown		unknown
DO37778	SKCM-US		TCGA-D3-A2J8	male	deceased			48		48		C77.4				1992		unknown		unknown
DO37774	SKCM-US		TCGA-HR-A2OH	female	deceased			46		46		C76.3				2004		unknown		unknown
DO37770	SKCM-US		TCGA-EE-A2MM	female	deceased			63		63		C77.3				5107		unknown		unknown
DO37790	SKCM-US		TCGA-FS-A4FB	female	deceased			46		46		C77.9				813		unknown		unknown
DO37786	SKCM-US		TCGA-D9-A1JW	male	alive			82		82		C77.0					82	unknown		unknown
DO37782	SKCM-US	PCAWG	TCGA-GN-A26C	male	deceased			77		77		C44.5				821		unknown		unknown
DO37758	SKCM-US	PCAWG	TCGA-DA-A1I2	male	deceased			45		57		C77.9				0		unknown		unknown
DO37754	SKCM-US		TCGA-EB-A44R	male	alive	complete remission		52		52		C77.4					309	unknown		unknown
DO37750	SKCM-US	PCAWG	TCGA-ER-A19D	female	deceased			46		46		C49.3				383		unknown		unknown
DO37766	SKCM-US		TCGA-GN-A263	male	deceased			24		24		C44.5				467		unknown		unknown
DO37762	SKCM-US		TCGA-FS-A4FC	female	alive	complete remission		75		79		C44.9					1504	unknown		unknown
DO37738	SKCM-US		TCGA-EE-A2GK	female	alive	complete remission		46		50		C77.4					1665	unknown		unknown
DO37734	SKCM-US		TCGA-FS-A1YW	male	deceased			52		52		C77.9				6598		unknown		unknown
DO37731	SKCM-US		TCGA-FS-A1ZM	male	alive	complete remission		74		82		C77.9					3080	unknown		unknown
DO37746	SKCM-US		TCGA-EE-A2GJ	male	alive	complete remission		83		90		C77.4					2717	unknown		unknown
DO37742	SKCM-US		TCGA-EE-A29T	female	alive	progression		51		79		C77.9					10523	unknown		unknown
DO37719	SKCM-US	PCAWG	TCGA-DA-A1I0	male	alive	complete remission		63		63		C44.9					215	unknown		unknown
DO37715	SKCM-US		TCGA-EE-A183	male	deceased			48		48		C77.3				818		unknown		unknown
DO37711	SKCM-US		TCGA-D9-A1JX	female	alive	progression		80		80		C77.4					195	unknown		unknown
DO37727	SKCM-US		TCGA-D3-A3MV	female	alive	progression		38		39		C49.2					653	unknown		unknown
DO37723	SKCM-US	PCAWG	TCGA-FS-A1ZU	female	deceased			70		70		C44.9				808		unknown		unknown
DO37798	SKCM-US		TCGA-ER-A19M	male	deceased			36		36		C44.5				1857		unknown		unknown
DO37794	SKCM-US		TCGA-EB-A299	male	alive	complete remission		63		63		C44.9					0	unknown		unknown
DO37707	SKCM-US		TCGA-EE-A3AD	male	alive	complete remission		50		50		C77.0					112	unknown		unknown
DO37703	SKCM-US	PCAWG	TCGA-FS-A1ZP	male	deceased			52		52		C77.9				2273		unknown		unknown
DO37419	SKCM-US		TCGA-FR-A3YO	female	alive	progression						C77.5					0	unknown		unknown
DO37418	SKCM-US	PCAWG	TCGA-DA-A3F8	male	alive	complete remission		39		39		C77.0					111	unknown		unknown
DO37417	SKCM-US		TCGA-EE-A2GB	male	alive	complete remission		51		54		C77.3					1446	unknown		unknown
DO37416	SKCM-US		TCGA-EE-A29A	male	deceased			68		68		C49.4				1927		unknown		unknown
DO37415	SKCM-US		TCGA-FS-A1YY	female	deceased			55		55		C76.2				6953		unknown		unknown
DO37414	SKCM-US		TCGA-EB-A42Z	male	alive	complete remission		49		49		C44.9					12	unknown		unknown
DO37413	SKCM-US		TCGA-ER-A1A1	male	alive	complete remission		58		64		C44.4					2433	unknown		unknown
DO37412	SKCM-US		TCGA-FS-A1ZZ	female	deceased			54		54		C77.9				822		unknown		unknown
DO37411	SKCM-US		TCGA-EB-A3XE	female	alive	complete remission		77		77		C44.9					0	unknown		unknown
DO37410	SKCM-US		TCGA-EE-A2GI	male	alive	complete remission		39		40		C77.3					686	unknown		unknown
DO37429	SKCM-US		TCGA-EB-A41A	male	alive	complete remission		90		90		C44.3					8	unknown		unknown
DO37428	SKCM-US		TCGA-D3-A1Q9	male	deceased			72		72		C77.9				961		unknown		unknown
DO37427	SKCM-US	PCAWG	TCGA-D3-A3MO	male	deceased			47		47		C49.4				284		unknown		unknown
DO37426	SKCM-US	PCAWG	TCGA-ER-A19J	male	deceased			54		54		C49.0				196		unknown		unknown
DO37425	SKCM-US	PCAWG	TCGA-EE-A2M5	male	deceased			49		49		C77.3				659		unknown		unknown
DO37424	SKCM-US	PCAWG	TCGA-DA-A1I8	female	alive	complete remission		63		65		C44.9					999	unknown		unknown
DO37423	SKCM-US		TCGA-EE-A2MN	male	deceased			58		58		C77.3				1446		unknown		unknown
DO37422	SKCM-US		TCGA-EE-A2GP	male	deceased			80		80		C77.3				423		unknown		unknown
DO37421	SKCM-US		TCGA-EE-A2MG	male	deceased			23		23		C77.3				3139		unknown		unknown
DO37420	SKCM-US		TCGA-D9-A149	female	alive	complete remission		65		69		C44.9					1513	unknown		unknown
DO37409	SKCM-US	PCAWG	TCGA-DA-A1HY	male	alive	complete remission		42		50		C77.9					3199	unknown		unknown
DO37408	SKCM-US		TCGA-EE-A2ML	male	alive	progression		35		51		C77.3					6176	unknown		unknown
DO37407	SKCM-US		TCGA-GF-A2C7	male	alive			48		48		C44.4					1	unknown		unknown
DO37406	SKCM-US		TCGA-FW-A3R5	male	alive			68		69		C77.0					697	unknown		unknown
DO37405	SKCM-US		TCGA-D3-A3CE	female	deceased			74		74		C77.9				1832		unknown		unknown
DO37404	SKCM-US		TCGA-EE-A29M	female	alive	complete remission		33		36		C77.3					1349	unknown		unknown
DO37499	SKCM-US		TCGA-EB-A3Y7	female	alive	complete remission		86		86		C49.0					0	unknown		unknown
DO37495	SKCM-US		TCGA-ER-A3PL	male	alive	progression		30		32		C49.1					1010	unknown		unknown
DO37480	SKCM-US		TCGA-GN-A26D	female	alive	progression		72		75		C44.5					1204	unknown		unknown
DO37477	SKCM-US		TCGA-GN-A268	female	deceased			83		83		C77.3				1910		unknown		unknown
DO37474	SKCM-US	PCAWG	TCGA-FS-A1ZK	male	deceased			68		68		C44.9				728		unknown		unknown
DO37491	SKCM-US		TCGA-GN-A265	male	alive	complete remission		53		60		C77.3					2577	unknown		unknown
DO37487	SKCM-US		TCGA-FS-A1ZC	male	deceased			51		51		C44.9				10870		unknown		unknown
DO37483	SKCM-US		TCGA-GN-A269	male	deceased			70		70		C44.5				170		unknown		unknown
DO37459	SKCM-US		TCGA-ER-A3ET	female	alive	progression		64		70		C49.9					2443	unknown		unknown
DO37456	SKCM-US		TCGA-D9-A1X3	male	alive	progression		63		63		C44.9					237	unknown		unknown
DO37454	SKCM-US		TCGA-FS-A1Z7	male	deceased			19		19		C77.9				237		unknown		unknown
DO37452	SKCM-US		TCGA-ER-A19N	male	deceased			47		47		C49.3				1341		unknown		unknown
DO37450	SKCM-US		TCGA-D3-A1Q6	male	deceased			55		55		C77.9				2184		unknown		unknown
DO37471	SKCM-US		TCGA-EE-A3AG	male	alive	progression		25		26		C49.2					714	unknown		unknown
DO37468	SKCM-US		TCGA-FS-A1ZT	male	alive	complete remission		55		59		C77.9					1617	unknown		unknown
DO37465	SKCM-US		TCGA-EE-A2GS	female	alive	progression		28		32		C49.2					1691	unknown		unknown
DO37462	SKCM-US		TCGA-FS-A1Z4	male	deceased			62		62		C77.9				854		unknown		unknown
DO37439	SKCM-US	PCAWG	TCGA-EE-A2A0	female	deceased			77		77		C77.4				1424		unknown		unknown
DO37438	SKCM-US		TCGA-EB-A24C	male	alive	complete remission		56		56		C44.5					14	unknown		unknown
DO37437	SKCM-US		TCGA-EB-A3XF	male	alive	complete remission		57		57		C44.9					4	unknown		unknown
DO37436	SKCM-US		TCGA-EE-A2MU	male	alive	complete remission		71		75		C49.1					1620	unknown		unknown
DO37435	SKCM-US	PCAWG	TCGA-DA-A3F5	male	alive	progression		45		61		C77.0					6076	unknown		unknown
DO37434	SKCM-US		TCGA-EE-A2GL	female	alive	complete remission		40		44		C77.3					1673	unknown		unknown
DO37433	SKCM-US		TCGA-FR-A44A	female	alive	complete remission		29		42		C77.3					4886	unknown		unknown
DO37432	SKCM-US	PCAWG	TCGA-GN-A266	male	deceased			45		45		C44.4				308		unknown		unknown
DO37431	SKCM-US		TCGA-FS-A1Z0	female	deceased			32		32		C44.9				6164		unknown		unknown
DO37430	SKCM-US	PCAWG	TCGA-DA-A1IC	male	alive	progression		81		86		C49.9					1926	unknown		unknown
DO37448	SKCM-US		TCGA-EE-A29R	female	alive	progression		48		49		C49.0					440	unknown		unknown
DO37447	SKCM-US		TCGA-DA-A1I5	female	alive	complete remission		27		34		C44.9					2899	unknown		unknown
DO37446	SKCM-US		TCGA-D3-A1Q8	male	deceased			33		33		C77.9				854		unknown		unknown
DO37445	SKCM-US	PCAWG	TCGA-D3-A1Q1	female	deceased			79		79		C77.9				504		unknown		unknown
DO37444	SKCM-US		TCGA-EE-A181	female	deceased			82		82		C77.4				1026		unknown		unknown
DO37443	SKCM-US		TCGA-EE-A3AH	male	deceased			30		30		C77.4				4222		unknown		unknown
DO37442	SKCM-US		TCGA-FS-A1ZQ	male	deceased			31		31		C34.9				4062		unknown		unknown
DO37441	SKCM-US		TCGA-FW-A3TU	female	alive			72		75		C34.1					1446	unknown		unknown
DO37440	SKCM-US	PCAWG	TCGA-EB-A24D	male	alive	complete remission		72		72		C44.6					42	unknown		unknown
DO50303	SKCM-US		TCGA-FR-A8YE	male	alive	complete remission		41		48		C77.3					2871	unknown		unknown
DO50304	SKCM-US		TCGA-GN-A4U9	male	alive	progression		71		72		C77.4					384	unknown		unknown
DO50300	SKCM-US		TCGA-ER-A19W	female	deceased			48		48		C49.3				4507		unknown		unknown
DO50301	SKCM-US		TCGA-FR-A8YC	male	deceased			78		78		C17.9				1059		unknown		unknown
DO50302	SKCM-US		TCGA-FR-A8YD	female	alive	progression		56		58		C34.3					896	unknown		unknown
DO50295	SKCM-US		TCGA-EB-A82C	female	alive	complete remission		70		70		C44.7					17	unknown		unknown
DO50296	SKCM-US		TCGA-EB-A85I	male	alive	complete remission		66		66		C44.7					-5	unknown		unknown
DO50297	SKCM-US		TCGA-EB-A85J	female	alive	complete remission		66		66		C44.7					-6	unknown		unknown
DO50298	SKCM-US		TCGA-EB-A97M	male	alive	complete remission		66		66		C44.5					11	unknown		unknown
DO50299	SKCM-US		TCGA-EE-A3JD	male	deceased			70		70		C77.3				832		unknown		unknown
DO50290	SKCM-US		TCGA-D9-A6EA	male	alive	complete remission		70		72		C77.3					766	unknown		unknown
DO50291	SKCM-US		TCGA-D9-A6EC	male	alive	complete remission		56		61		C77.3					2015	unknown		unknown
DO50292	SKCM-US		TCGA-D9-A6EG	male	deceased			56		56		C49.9				698		unknown		unknown
DO50293	SKCM-US		TCGA-EB-A5SH	female	alive	complete remission		60		62		C77.9					1065	unknown		unknown
DO50294	SKCM-US		TCGA-EB-A82B	female	alive	complete remission		58		58		C44.7					14	unknown		unknown
DO50284	SKCM-US		TCGA-D3-A8GI	male	deceased			68		68		C77.0				1780		unknown		unknown
DO50285	SKCM-US		TCGA-D3-A8GJ	male	alive	complete remission		18		37		C17.9					6965	unknown		unknown
DO50286	SKCM-US		TCGA-D3-A8GK	male	alive	complete remission		45		58		C49.5					4757	unknown		unknown
DO50287	SKCM-US		TCGA-D3-A8GL	male	deceased			43		43		C49.2				2711		unknown		unknown
DO50288	SKCM-US		TCGA-D3-A8GM	male	alive	complete remission		73		80		C77.0					2897	unknown		unknown
DO50289	SKCM-US		TCGA-D9-A6E9	female	alive	complete remission		75		75		C77.4					-5	unknown		unknown
DO50280	SKCM-US		TCGA-D3-A8GB	male	deceased			48		48		C77.4				938		unknown		unknown
DO50281	SKCM-US		TCGA-D3-A8GC	male	deceased			48		48		C77.3				2421		unknown		unknown
DO50282	SKCM-US		TCGA-D3-A8GD	female	alive	progression		63		63		C77.4					353	unknown		unknown
DO50283	SKCM-US		TCGA-D3-A8GE	male	alive	progression		26		27		C44.6					462	unknown		unknown
DO50278	SKCM-US		TCGA-BF-A1PU	female	alive	complete remission		46		47		C44.9					387	unknown		unknown
DO50279	SKCM-US		TCGA-BF-A1PZ	female	alive	complete remission		71		71		C44.9					12	unknown		unknown
DO47712	SKCM-US		TCGA-ER-A195	male	deceased			46		46		C49.6				1078		unknown		unknown
DO47706	SKCM-US		TCGA-D3-A5GS	male	alive	progression		58		58		C77.4					226	unknown		unknown
DO47700	SKCM-US		TCGA-D3-A51G	male	alive	complete remission						C49.2					0	unknown		unknown
DO47469	SKCM-US		TCGA-D3-A1QA	male	alive	progression		55		61		C77.9					2326	unknown		unknown
DO47465	SKCM-US		TCGA-D3-A51E	female	alive	complete remission		39		52		C49.2					4923	unknown		unknown
DO48792	SKCM-US		TCGA-EB-A5SF	female	alive	complete remission		78		78		C44.9					0	unknown		unknown
DO47459	SKCM-US		TCGA-EE-A17Y	male	deceased			69		69		C44.5				828		unknown		unknown
DO47453	SKCM-US		TCGA-EB-A551	female	alive	complete remission		78		78		C44.7					8	unknown		unknown
DO47451	SKCM-US	PCAWG	TCGA-ER-A2NF	male	alive	progression		53		54		C44.4					498	unknown		unknown
DO47449	SKCM-US		TCGA-ER-A2ND	female	deceased			57		57		C44.5				710		unknown		unknown
DO47448	SKCM-US		TCGA-ER-A2NB	male	alive	progression		57		58		C44.5					486	unknown		unknown
DO47442	SKCM-US		TCGA-EE-A184	male	deceased			72		72		C44.6				2073		unknown		unknown
DO48770	SKCM-US		TCGA-EE-A3J7	male	alive	complete remission		43		48		C49.1					1949	unknown		unknown
DO47436	SKCM-US		TCGA-D3-A5GR	female	alive	complete remission		23		36		C77.4					5055	unknown		unknown
DO48766	SKCM-US		TCGA-EE-A3JE	male	alive	complete remission		75		77		C49.6					1016	unknown		unknown
DO48765	SKCM-US		TCGA-GF-A6C8	female	alive			62		62		C77.3					62	unknown		unknown
DO47430	SKCM-US		TCGA-D3-A5GL	male	alive	complete remission		74		83		C77.3					3374	unknown		unknown
DO47425	SKCM-US		TCGA-ER-A19A	male	alive	complete remission		79		85		C49.6					2365	unknown		unknown
DO47419	SKCM-US		TCGA-D3-A5GO	male	alive	complete remission		61		72		C44.6					4195	unknown		unknown
DO47413	SKCM-US		TCGA-D3-A3ML	male	deceased			70		70		C77.0				422		unknown		unknown
DO47407	SKCM-US		TCGA-D3-A2JP	male	alive	progression		37		40		C77.3					1372	unknown		unknown
DO47401	SKCM-US		TCGA-EB-A4XL	female	alive	complete remission		56		56		C44.9					0	unknown		unknown
DO48726	SKCM-US		TCGA-EB-A5SG	female	alive	complete remission		57		60		C77.3					1372	unknown		unknown
DO47497	SKCM-US		TCGA-ER-A19Q	female	deceased			37		37		C44.5				1548		unknown		unknown
DO47485	SKCM-US		TCGA-D9-A4Z6	male	alive	progression		54		54		C77.3					338	unknown		unknown
DO47491	SKCM-US		TCGA-ER-A19B	male	deceased			42		42		C49.6				2993		unknown		unknown
DO47474	SKCM-US		TCGA-ER-A196	female	alive	complete remission		64		65		C44.7					477	unknown		unknown
DO47480	SKCM-US		TCGA-D3-A51R	male	alive	complete remission		60		64		C49.3					1572	unknown		unknown
DO48702	SKCM-US		TCGA-EB-A6QY	male	alive	complete remission		71		71		C44.9					-5	unknown		unknown
DO47349	SKCM-US		TCGA-D3-A51K	male	alive	complete remission		51		52		C77.4					559	unknown		unknown
DO47343	SKCM-US		TCGA-EB-A51B	male	alive	complete remission		53		53		C44.6					-5	unknown		unknown
DO47337	SKCM-US		TCGA-D3-A3MU	male	alive	progression		53		55		C77.3					819	unknown		unknown
DO48667	SKCM-US		TCGA-BF-A3DM	male	alive	complete remission		63		63		C44.9					14	unknown		unknown
DO48663	SKCM-US		TCGA-ER-A2NE	male	deceased			39		39		C49.9				613		unknown		unknown
DO48665	SKCM-US		TCGA-FR-A726	male	alive	complete remission		90		90		C44.2					263	unknown		unknown
DO47331	SKCM-US	PCAWG	TCGA-EE-A3J5	male	deceased			71		71		C44.5				1124		unknown		unknown
DO47329	SKCM-US		TCGA-EB-A553	male	alive	complete remission		62		62		C44.5					13	unknown		unknown
DO48652	SKCM-US		TCGA-EE-A3J3	male	deceased			42		42		C77.3				5237		unknown		unknown
DO48654	SKCM-US		TCGA-QB-A6FS	male	alive	progression		49		49		C77.4					203	unknown		unknown
DO47323	SKCM-US		TCGA-D3-A3C1	male	alive	progression						C77.3					0	unknown		unknown
DO47320	SKCM-US		TCGA-GN-A4U8	male	alive			51		54		C77.3					1410	unknown		unknown
DO37996	SKCM-US		TCGA-EE-A2GR	male	alive	complete remission		78		79		C49.1					435	unknown		unknown
DO37991	SKCM-US		TCGA-FR-A3R1	male	alive	complete remission		69		69		C44.6					307	unknown		unknown
DO47318	SKCM-US		TCGA-ER-A2NC	male	deceased			50		50		C76.1				1333		unknown		unknown
DO48646	SKCM-US		TCGA-EB-A6R0	female	alive	complete remission		58		58		C44.9					-2	unknown		unknown
DO47317	SKCM-US		TCGA-D3-A5GN	female	alive	complete remission		15		26		C77.0					4129	unknown		unknown
DO47313	SKCM-US		TCGA-EB-A5KH	male	alive			55		56		C77.4					543	unknown		unknown
DO47309	SKCM-US		TCGA-BF-A1PV	female	alive	complete remission		74		74		C44.9					14	unknown		unknown
DO47303	SKCM-US		TCGA-EE-A29G	male	deceased			53		53		C44.4				2192		unknown		unknown
DO48637	SKCM-US		TCGA-EB-A6L9	male	alive	complete remission		55		56		C77.5					371	unknown		unknown
DO47305	SKCM-US		TCGA-EB-A4P0	male	alive	complete remission		82		82		C44.5					-2	unknown		unknown
DO37976	SKCM-US		TCGA-EE-A2M6	male	alive	complete remission		61		71		C77.3					3932	unknown		unknown
DO37971	SKCM-US		TCGA-D9-A148	male	alive	progression		40		52		C50.9					4511	unknown		unknown
DO48626	SKCM-US		TCGA-EB-A6QZ	female	alive	complete remission		76		76		C44.9					-3	unknown		unknown
DO37986	SKCM-US		TCGA-EE-A20H	male	deceased			56		56		C44.5				5118		unknown		unknown
DO37981	SKCM-US		TCGA-D3-A1Q7	female	alive	complete remission		42		52		C77.9					3687	unknown		unknown
DO48618	SKCM-US		TCGA-FR-A729	female	alive	complete remission		38		55		C77.4					6390	unknown		unknown
DO37956	SKCM-US		TCGA-FS-A1ZJ	female	deceased			75		75		C77.9				1441		unknown		unknown
DO37951	SKCM-US		TCGA-DA-A1I7	male	alive	progression		62		66		C44.9					1495	unknown		unknown
DO48601	SKCM-US		TCGA-OD-A75X	male	alive	complete remission		49		73		C34.1					8966	unknown		unknown
DO48604	SKCM-US		TCGA-EE-A3J4	male	deceased			72		72		C49.5				3869		unknown		unknown
DO37966	SKCM-US		TCGA-DA-A1I1	male	alive	progression		55		68		C44.9					4830	unknown		unknown
DO37961	SKCM-US		TCGA-EE-A20F	male	alive	complete remission		53		59		C77.5					2399	unknown		unknown
DO47395	SKCM-US		TCGA-ER-A199	female	deceased			86		86		C77.4				279		unknown		unknown
DO47389	SKCM-US		TCGA-D3-A51T	female	alive	complete remission		59		60		C77.3					458	unknown		unknown
DO47386	SKCM-US		TCGA-D3-A3CB	male	alive	complete remission		39		51		C77.3					4511	unknown		unknown
DO47374	SKCM-US		TCGA-BF-A1Q0	male	alive	complete remission		80		80		C44.9					17	unknown		unknown
DO47380	SKCM-US		TCGA-ER-A19S	female	alive	complete remission		81		84		C44.5					1133	unknown		unknown
DO47368	SKCM-US		TCGA-ER-A193	male	deceased			62		62		C49.0				955		unknown		unknown
DO47362	SKCM-US		TCGA-EB-A5FP	female	alive	progression		65		65		C44.9					6	unknown		unknown
DO47359	SKCM-US		TCGA-D3-A51J	male	alive	complete remission		19		29		C49.5					4012	unknown		unknown
DO47353	SKCM-US		TCGA-ER-A19C	male	deceased			77		77		C77.3				1487		unknown		unknown
DO48683	SKCM-US		TCGA-FR-A7U8	male	alive	progression		50		51		C17.9					461	unknown		unknown
DO37936	SKCM-US		TCGA-EE-A29S	male	alive	progression		79		83		C77.3					1701	unknown		unknown
DO37931	SKCM-US		TCGA-EE-A17X	male	deceased			54		54		C44.5				907		unknown		unknown
DO37946	SKCM-US	PCAWG	TCGA-EE-A2GT	male	alive	complete remission		77		78		C77.3					595	unknown		unknown
DO37941	SKCM-US		TCGA-EE-A2A5	male	deceased			43		43		C49.1				1195		unknown		unknown
DO37916	SKCM-US		TCGA-EE-A29P	female	alive	progression		73		77		C77.3					1716	unknown		unknown
DO37911	SKCM-US		TCGA-EE-A3AF	female	deceased			48		48		C77.0				420		unknown		unknown
DO37926	SKCM-US		TCGA-FS-A4F4	male	deceased			64		64		C49.9				2028		unknown		unknown
DO37921	SKCM-US		TCGA-EE-A17Z	male	deceased			57		57		C44.5				263		unknown		unknown
DO37906	SKCM-US		TCGA-EB-A430	male	alive	complete remission		83		83		C44.5					-2	unknown		unknown
DO37901	SKCM-US		TCGA-D3-A2J6	male	deceased			65		65		C77.4				1321		unknown		unknown
DO47695	SKCM-US		TCGA-D3-A2J7	male	deceased			67		67		C77.9				3136		unknown		unknown
DO47689	SKCM-US		TCGA-EB-A4OZ	female	alive	complete remission		41		41		C44.5					-3	unknown		unknown
DO47683	SKCM-US		TCGA-ER-A2NH	male	alive	complete remission		49		51		C77.3					975	unknown		unknown
DO47677	SKCM-US		TCGA-D3-A5GT	male	alive	complete remission		43		43		C44.5					179	unknown		unknown
DO47672	SKCM-US		TCGA-ER-A19K	female	deceased			79		79		C44.4				469		unknown		unknown
DO47667	SKCM-US		TCGA-D3-A3C3	female	alive	progression						C77.4					0	unknown		unknown
DO47662	SKCM-US		TCGA-D9-A4Z5	male	alive	complete remission		68		68		C44.31					29	unknown		unknown
DO47665	SKCM-US		TCGA-EE-A20C	male	deceased			59		59		C44.5				4601		unknown		unknown
DO47658	SKCM-US		TCGA-EE-A29W	male	alive	complete remission		42		56		C77.4					5218	unknown		unknown
DO47652	SKCM-US		TCGA-D3-A2JA	male	alive	complete remission		68		76		C49.6					3104	unknown		unknown
DO47646	SKCM-US		TCGA-ER-A194	male	deceased			77		77		C49.1				1354		unknown		unknown
DO47643	SKCM-US		TCGA-D3-A51H	male	alive	complete remission		60		63		C77.3					1221	unknown		unknown
DO47638	SKCM-US		TCGA-EB-A44N	male	alive	complete remission		59		59		C44.9					45	unknown		unknown
DO47636	SKCM-US		TCGA-D3-A3C8	female	alive	progression		58		60		C49.0					1038	unknown		unknown
DO47631	SKCM-US		TCGA-D3-A1Q4	female	alive	complete remission		53		60		C77.9					2885	unknown		unknown
DO47623	SKCM-US		TCGA-ER-A19P	female	deceased			47		47		C49.5				4930		unknown		unknown
DO47625	SKCM-US		TCGA-EE-A3JA	male	deceased			44		44		C49.9				1618		unknown		unknown
DO47613	SKCM-US		TCGA-D3-A2JG	female	deceased			30		30		C77.5				3453		unknown		unknown
DO47619	SKCM-US		TCGA-D3-A2JO	female	alive	complete remission		50		54		C49.3					1548	unknown		unknown
DO47607	SKCM-US		TCGA-D3-A2JB	female	deceased			70		70		C77.4				5110		unknown		unknown
DO47601	SKCM-US		TCGA-EB-A5UL	male	alive			71		71		C77.3					108	unknown		unknown
DO47584	SKCM-US		TCGA-D3-A5GU	male	alive	progression		36		46		C77.3					3808	unknown		unknown
DO47590	SKCM-US		TCGA-D3-A2JN	female	alive	complete remission		46		50		C77.3					1709	unknown		unknown
DO47578	SKCM-US		TCGA-D3-A2JC	female	alive	complete remission		53		58		C77.3					2126	unknown		unknown
DO47576	SKCM-US		TCGA-D9-A4Z2	male	alive	progression		50		50		C44.5					93	unknown		unknown
DO47573	SKCM-US		TCGA-D3-A1QB	female	alive	complete remission		75		81		C77.9					2512	unknown		unknown
DO47569	SKCM-US		TCGA-D3-A3C7	female	alive	complete remission		57		59		C77.4					1007	unknown		unknown
DO47563	SKCM-US		TCGA-ER-A198	male	deceased			45		45		C49.3				1544		unknown		unknown
DO47559	SKCM-US		TCGA-GF-A4EO	female	alive	complete remission		74		74		C77.3					220	unknown		unknown
DO47552	SKCM-US		TCGA-ER-A2NG	female	alive	progression		43		45		C77.3					951	unknown		unknown
DO47555	SKCM-US		TCGA-D9-A4Z3	female	alive			73		73		C44.6					104	unknown		unknown
DO47546	SKCM-US		TCGA-ER-A3ES	male	deceased			25		25		C48.2				7514		unknown		unknown
DO47542	SKCM-US	PCAWG	TCGA-ER-A19E	female	deceased			36		36		C44.5				396		unknown		unknown
DO47537	SKCM-US		TCGA-EE-A180	male	deceased			69		69		C44.6				2889		unknown		unknown
DO47531	SKCM-US		TCGA-EB-A5VU	male	alive	complete remission		56		56		C44.7					12	unknown		unknown
DO47525	SKCM-US		TCGA-EB-A44P	female	alive	complete remission		58		58		C44.5					7	unknown		unknown
DO47519	SKCM-US		TCGA-ER-A197	female	deceased			83		83		C51.9				424		unknown		unknown
DO47513	SKCM-US		TCGA-D3-A3BZ	male	alive	complete remission		63		72		C77.0					3516	unknown		unknown
DO47595	SKCM-US		TCGA-EE-A3JH	male	alive	complete remission		54		62		C77.3					3096	unknown		unknown
DO47503	SKCM-US		TCGA-D3-A51F	male	alive	complete remission		51		54		C77.4					1329	unknown		unknown
DO47509	SKCM-US		TCGA-D3-A1Q3	male	deceased			64		64		C77.9				507		unknown		unknown
DO38105	SKCM-US		TCGA-D9-A3Z1	male	alive	complete remission		66		66		C77.3					345	unknown		unknown
DO38117	SKCM-US		TCGA-FS-A4F8	male	deceased			52		52		C77.9				5318		unknown		unknown
DO38111	SKCM-US		TCGA-FR-A3YN	male	alive	complete remission		44		50		C77.4					2449	unknown		unknown
DO38075	SKCM-US		TCGA-EE-A2M8	female	deceased			54		54		C77.4				601		unknown		unknown
DO38069	SKCM-US		TCGA-FS-A4F9	male	alive	complete remission		80		81		C77.9					378	unknown		unknown
DO38087	SKCM-US		TCGA-EB-A44Q	female	alive	complete remission		51		51		C77.4					28	unknown		unknown
DO38081	SKCM-US		TCGA-EB-A3Y6	female	alive	complete remission		56		56		C49.2					16	unknown		unknown
DO38051	SKCM-US		TCGA-EE-A2MT	male	alive	complete remission		45		48		C77.3					1265	unknown		unknown
DO38045	SKCM-US		TCGA-EE-A2A1	male	alive	complete remission		46		52		C77.3					2402	unknown		unknown
DO38063	SKCM-US		TCGA-ER-A19O	male	deceased			56		56		C44.6				0		unknown		unknown
DO38057	SKCM-US		TCGA-EE-A3AB	male	alive	complete remission		30		40		C77.3					3733	unknown		unknown
DO38028	SKCM-US		TCGA-EE-A29C	male	alive	progression		20		23		C44.5					1455	unknown		unknown
DO38022	SKCM-US		TCGA-DA-A1IA	female	alive	complete remission		32		37		C71.1					1887	unknown		unknown
DO38039	SKCM-US		TCGA-FS-A1ZF	female	deceased			78		78		C77.9				470		unknown		unknown
DO38033	SKCM-US		TCGA-DA-A1IB	female	alive	complete remission		69		69		C77.9					73	unknown		unknown
DO38006	SKCM-US		TCGA-EE-A29V	male	deceased			85		85		C44.5				787		unknown		unknown
DO38001	SKCM-US		TCGA-EE-A29N	male	deceased			78		78		C77.3				566		unknown		unknown
DO38016	SKCM-US		TCGA-EE-A2GE	male	alive	complete remission		44		55		C77.3					4135	unknown		unknown
DO38011	SKCM-US		TCGA-EE-A2ME	male	deceased			51		51		C77.4				3141		unknown		unknown
DO38093	SKCM-US		TCGA-GN-A261	female	deceased			43		43		C44.7				2324		unknown		unknown
DO38099	SKCM-US		TCGA-EE-A2MJ	male	deceased			60		60		C77.3				2927		unknown		unknown
DO223906	SKCM-US		TCGA-BF-A5EP	female	alive	complete remission		75		75		C44.5					11	unknown		unknown
DO223909	SKCM-US		TCGA-ER-A42H	male	deceased			76		76		C43.51				426		unknown		unknown
DO223908	SKCM-US		TCGA-DA-A95Y	male	alive	progression		68		68		C77.3					302	unknown		unknown
DO223907	SKCM-US		TCGA-BF-AAOX	male	alive	complete remission		83		83		C44.601					11	unknown		unknown
DO223910	SKCM-US		TCGA-ER-A42L	male	alive	progression		49		59		C74.9					3812	unknown		unknown
DO51300	SKCM-US		TCGA-YG-AA3P	female	alive	progression		63		64		C49.6					439	unknown		unknown
DO51301	SKCM-US		TCGA-Z2-A8RT	female	alive	progression		42		43		C44.6					719	unknown		unknown
DO51302	SKCM-US		TCGA-Z2-AA3S	male	alive	progression		58		65		C77.3					2831	unknown		unknown
DO51303	SKCM-US		TCGA-Z2-AA3V	female	alive	complete remission		57		57		C77.3					357	unknown		unknown
DO51285	SKCM-US		TCGA-WE-A8ZN	male	alive	progression		57		61		C77.9					1463	unknown		unknown
DO51286	SKCM-US		TCGA-WE-A8ZO	female	alive	complete remission		73		77		C77.4					1807	unknown		unknown
DO51288	SKCM-US		TCGA-WE-A8ZQ	male	alive	complete remission		48		52		C77.4					1592	unknown		unknown
DO51289	SKCM-US		TCGA-WE-A8ZR	male	alive	progression		49		49		C77.4					133	unknown		unknown
DO51280	SKCM-US		TCGA-WE-A8K1	male	alive	complete remission		74		77		C49.20					1173	unknown		unknown
DO51281	SKCM-US		TCGA-WE-A8K4	male	alive	complete remission		85		85		C44.6					306	unknown		unknown
DO51282	SKCM-US		TCGA-WE-A8K5	male	alive	progression		65		69		C49.20					1654	unknown		unknown
DO51283	SKCM-US		TCGA-WE-A8K6	male	alive	progression		79		79		C77.4					262	unknown		unknown
DO51284	SKCM-US		TCGA-WE-A8ZM	male	alive	progression		70		77		C49.3					2746	unknown		unknown
DO51274	SKCM-US		TCGA-W3-AA1O	male	deceased			85		85		C77.3				122		unknown		unknown
DO51275	SKCM-US		TCGA-W3-AA1R	male	deceased			71		71		C77.0				3379		unknown		unknown
DO51276	SKCM-US		TCGA-W3-AA1V	male	deceased			63		63		C77.3				1280		unknown		unknown
DO51277	SKCM-US		TCGA-W3-AA1W	male	alive	complete remission		64		81		C77.2					6301	unknown		unknown
DO51278	SKCM-US		TCGA-W3-AA21	male	deceased			26		26		C77.3				3195		unknown		unknown
DO51279	SKCM-US		TCGA-WE-A8JZ	male	alive	complete remission		70		72		C77.4					731	unknown		unknown
DO51270	SKCM-US		TCGA-RP-A695	male	alive	complete remission						C71.9					0	unknown		unknown
DO51271	SKCM-US		TCGA-W3-A824	male	alive			63		80		C77.3					6455	unknown		unknown
DO51272	SKCM-US		TCGA-W3-A825	female	deceased			60		60		C34.3				1917		unknown		unknown
DO51273	SKCM-US		TCGA-W3-A828	male	deceased			66		66		C34.3				3683		unknown		unknown
DO51263	SKCM-US		TCGA-GN-A9SD	female	deceased			59		59		C77.4				1807		unknown		unknown
DO51265	SKCM-US		TCGA-HR-A5NC	female	alive	complete remission		90		90		C44.5					1000	unknown		unknown
DO51266	SKCM-US		TCGA-LH-A9QB	female	alive	complete remission		24		53		C44.5					10860	unknown		unknown
DO51267	SKCM-US		TCGA-QB-AA9O	male	deceased			73		73		C49.1				549		unknown		unknown
DO51268	SKCM-US		TCGA-RP-A693	male	alive	complete remission		77		77		C71.9					10	unknown		unknown
DO51269	SKCM-US		TCGA-RP-A694	male	alive	complete remission		71		71		C71.3					21	unknown		unknown
DO51261	SKCM-US		TCGA-GN-A8LL	female	deceased			68		68		C77.5				650		unknown		unknown
DO51262	SKCM-US		TCGA-GN-A8LN	male	alive	progression		68		69		C77.5					420	unknown		unknown
DO51252	SKCM-US		TCGA-ER-A42K	female	alive	progression		40		40		C77.3					206	unknown		unknown
DO51253	SKCM-US		TCGA-FR-A7UA	female	alive	progression		65		67		C77.3					801	unknown		unknown
DO51254	SKCM-US		TCGA-GF-A6C9	male	alive	complete remission		78		78		C07					357	unknown		unknown
DO51255	SKCM-US		TCGA-GF-A769	male	deceased			39		39		C44.7				1070		unknown		unknown
DO51256	SKCM-US		TCGA-GN-A4U4	male	alive	progression		73		75		C77.3					784	unknown		unknown
DO51257	SKCM-US		TCGA-GN-A4U5	female	alive	complete remission		61		62		C49.6					707	unknown		unknown
DO51258	SKCM-US		TCGA-GN-A4U7	female	alive	progression		56		56		C77.5					266	unknown		unknown
DO51259	SKCM-US		TCGA-GN-A8LK	male	deceased			70		70		C34.3				1524		unknown		unknown
DO51250	SKCM-US		TCGA-EE-A3JB	female	alive	progression		60		76		C49.1					6138	unknown		unknown
DO51251	SKCM-US	PCAWG	TCGA-ER-A19T	male	deceased			51		51		C44.7				270		unknown		unknown
DO51249	SKCM-US		TCGA-EE-A2MF	female	deceased			39		39		C77.4				8174		unknown		unknown
DO51242	SKCM-US		TCGA-D3-A8GO	female	deceased							C77.3				0		unknown		unknown
DO51244	SKCM-US		TCGA-D3-A8GP	male	alive	complete remission		77		88		C18.9					4191	unknown		unknown
DO51246	SKCM-US		TCGA-D3-A8GQ	male	deceased			66		66		C17.9				884		unknown		unknown
DO51247	SKCM-US		TCGA-D3-A8GR	female	deceased			54		54		C17.9				3943		unknown		unknown
DO51248	SKCM-US		TCGA-D3-A8GS	male	deceased			52		52		C17.9				3564		unknown		unknown
DO51240	SKCM-US		TCGA-D3-A8GN	female	alive	complete remission		27		39		C17.9					4529	unknown		unknown
DO51238	SKCM-US		TCGA-BF-A3DL	female	alive	complete remission		84		84		C44.9					28	unknown		unknown
DO51239	SKCM-US		TCGA-BF-A3DN	female	alive	complete remission		81		81		C44.9					32	unknown		unknown
DO51232	SKCM-US		TCGA-3N-A9WB	male	deceased			71		71		C44.5				518		unknown		unknown
DO51234	SKCM-US		TCGA-3N-A9WC	male	alive	progression		82		87		C77.3					1856	unknown		unknown
DO51235	SKCM-US		TCGA-3N-A9WD	male	deceased			82		82		C77.0				395		unknown		unknown
DO51236	SKCM-US		TCGA-BF-A1PX	male	deceased			56		56		C44.9				282		unknown		unknown
DO51237	SKCM-US		TCGA-BF-A3DJ	female	alive	complete remission		36		37		C44.9					464	unknown		unknown
DO51296	SKCM-US		TCGA-WE-AAA4	female	alive	complete remission		56		57		C44.7					461	unknown		unknown
DO51297	SKCM-US		TCGA-YD-A9TB	female	alive	progression						C54.1					0	unknown		unknown
DO51298	SKCM-US		TCGA-YG-AA3N	male	alive	complete remission		67		67		C44.5					201	unknown		unknown
DO51299	SKCM-US		TCGA-YG-AA3O	male	alive	progression		62		65		C77.3					1096	unknown		unknown
DO51290	SKCM-US		TCGA-WE-A8ZT	female	alive			25		25		C77.3					114	unknown		unknown
DO51291	SKCM-US		TCGA-WE-A8ZX	male	alive	complete remission		45		46		C77.3					690	unknown		unknown
DO51292	SKCM-US		TCGA-WE-A8ZY	male	alive			62		65		C44.5					1330	unknown		unknown
DO51293	SKCM-US		TCGA-WE-AA9Y	male	alive	progression		37		37		C77.4					67	unknown		unknown
DO51294	SKCM-US		TCGA-WE-AAA0	male	alive	progression		47		49		C77.9					918	unknown		unknown
DO51295	SKCM-US		TCGA-WE-AAA3	female	alive	complete remission		84		84		C77.4					315	unknown		unknown
DO38171	SKCM-US		TCGA-D3-A3CC	female	alive	progression		69		74		C49.9					2168	unknown		unknown
DO38165	SKCM-US		TCGA-FS-A1ZN	male	deceased			43		43		C44.9				730		unknown		unknown
DO38177	SKCM-US		TCGA-EE-A2MK	female	alive	complete remission		18		30		C77.4					4403	unknown		unknown
DO38153	SKCM-US		TCGA-D3-A2JF	male	alive	complete remission		74		78		C49.1					1483	unknown		unknown
DO38147	SKCM-US		TCGA-GN-A267	male	deceased			38		38		C77.3				1960		unknown		unknown
DO38159	SKCM-US		TCGA-FW-A3TV	female	alive			57		57		C77.3					5	unknown		unknown
DO38129	SKCM-US	PCAWG	TCGA-DA-A1HW	female	alive	progression		37		37		C77.9					59	unknown		unknown
DO38123	SKCM-US		TCGA-EE-A29D	male	deceased			87		87		C77.0				425		unknown		unknown
DO38141	SKCM-US		TCGA-D3-A2J9	male	deceased			75		75		C77.3				723		unknown		unknown
DO38135	SKCM-US		TCGA-FS-A1ZY	male	deceased			71		71		C44.9				824		unknown		unknown
DO219497	SKCM-US		TCGA-XV-AAZY	female	alive	complete remission		76		76		C44.5					13	unknown		unknown
DO219495	SKCM-US		TCGA-XV-AAZW	female	alive			62		62		C44.7					18	unknown		unknown
DO219493	SKCM-US		TCGA-XV-AAZV	female	alive	complete remission		56		56		C44.5					17	unknown		unknown
DO219491	SKCM-US		TCGA-XV-A9W5	male	alive	complete remission		51		51		C44.6					15	unknown		unknown
DO219490	SKCM-US		TCGA-XV-A9W2	male	alive	complete remission		81		81		C44.6					12	unknown		unknown
DO219486	SKCM-US		TCGA-RP-A6K9	female	alive							C41.0					0	unknown		unknown
DO219485	SKCM-US		TCGA-RP-A690	female	alive			66		66		C72.0					6	unknown		unknown
DO219484	SKCM-US		TCGA-GN-A4U3	male	alive	progression		30		39		C71.1					3288	unknown		unknown
DO219489	SKCM-US		TCGA-XV-A9VZ	female	alive			90		90		C44.7					9	unknown		unknown
DO219487	SKCM-US		TCGA-W3-AA1Q	male	deceased			57		57		C74.9				2101		unknown		unknown
DO219482	SKCM-US		TCGA-DA-A960	male	alive	complete remission		73		74		C49.1					435	unknown		unknown
DO219481	SKCM-US		TCGA-DA-A95Z	male	alive	complete remission		87		87		C49.6					27	unknown		unknown
DO219480	SKCM-US		TCGA-DA-A95X	male	alive	complete remission		62		65		C49.3					1144	unknown		unknown
DO219474	SKCM-US		TCGA-BF-AAP8	male	alive	complete remission		58		58		C44.601					14	unknown		unknown
DO219472	SKCM-US		TCGA-BF-AAP7	female	alive	complete remission		76		76		C44.701					15	unknown		unknown
DO219479	SKCM-US		TCGA-DA-A95W	male	alive	complete remission		52		52		C77.0					31	unknown		unknown
DO219478	SKCM-US		TCGA-DA-A95V	female	alive	complete remission		83		85		C77.0					1088	unknown		unknown
DO219477	SKCM-US		TCGA-D3-A8GV	male	deceased			25		25		C49.6				5101		unknown		unknown
DO219476	SKCM-US		TCGA-D3-A2JE	female	deceased			75		75		C77.3				841		unknown		unknown
DO219470	SKCM-US		TCGA-BF-AAP6	male	alive	complete remission		55		55		C44.701					15	unknown		unknown
DO219464	SKCM-US		TCGA-BF-AAP1	male	alive	complete remission		86		86		C44.601					14	unknown		unknown
DO219462	SKCM-US		TCGA-BF-AAP0	female	alive	complete remission		40		40		C77.3					14	unknown		unknown
DO219468	SKCM-US		TCGA-BF-AAP4	male	alive	complete remission		61		61		C44.50					15	unknown		unknown
DO219466	SKCM-US		TCGA-BF-AAP2	male	alive	complete remission		62		62		C44.601					13	unknown		unknown
DO219460	SKCM-US		TCGA-BF-AAOU	female	alive	complete remission		73		73		C44.5					13	unknown		unknown
DO219458	SKCM-US		TCGA-BF-A9VF	male	alive	complete remission		77		77		C49.2					12	unknown		unknown
DO219452	SKCM-US		TCGA-BF-A5EQ	male	alive	complete remission		63		63		C44.5					12	unknown		unknown
DO219450	SKCM-US		TCGA-BF-A5EO	male	alive	complete remission		65		65		C44.5					338	unknown		unknown
DO219456	SKCM-US		TCGA-BF-A5ES	female	alive	complete remission		76		76		C44.5					19	unknown		unknown
DO219454	SKCM-US		TCGA-BF-A5ER	male	alive	complete remission		63		63		C44.5					12	unknown		unknown
DO219503	SKCM-US		TCGA-YD-A9TA	male	alive	complete remission		75		79		C34.1					1496	unknown		unknown
DO219501	SKCM-US		TCGA-YD-A89C	female	alive	complete remission		43		43		C22.0					210	unknown		unknown

## Sheet: TCGA_PFS
sample	PFI	PFS
TCGA-3N-A9WB-06	1	426
TCGA-3N-A9WC-06	1	1705
TCGA-3N-A9WD-06	1	306
TCGA-BF-A1PU-01	1	484
TCGA-BF-A1PV-01	0	14
TCGA-BF-A1PX-01	0	282
TCGA-BF-A1PZ-01	0	853
TCGA-BF-A1Q0-01	0	831
TCGA-BF-A3DJ-01	1	217
TCGA-BF-A3DL-01	0	769
TCGA-BF-A3DM-01	0	601
TCGA-BF-A3DN-01	0	717
TCGA-BF-A5EO-01	0	703
TCGA-BF-A5EP-01	0	335
TCGA-BF-A5EQ-01	0	323
TCGA-BF-A5ER-01	0	327
TCGA-BF-A5ES-01	0	490
TCGA-BF-A9VF-01	0	440
TCGA-BF-AAOU-01	0	476
TCGA-BF-AAOX-01	0	444
TCGA-BF-AAP0-06	0	454
TCGA-BF-AAP1-01	0	409
TCGA-BF-AAP2-01	0	405
TCGA-BF-AAP4-01	0	335
TCGA-BF-AAP6-01	0	325
TCGA-BF-AAP7-01	0	318
TCGA-BF-AAP8-01	0	447
TCGA-D3-A1Q1-06	1	58
TCGA-D3-A1Q3-06	1	507
TCGA-D3-A1Q4-06	0	3408
TCGA-D3-A1Q5-06	1	2452
TCGA-D3-A1Q6-06	1	48
TCGA-D3-A1Q7-06	1	921
TCGA-D3-A1Q8-06	1	147
TCGA-D3-A1Q9-06	1	44
TCGA-D3-A1QA-07	1	1393
TCGA-D3-A1QA-06	1	1393
TCGA-D3-A1QB-06	1	0
TCGA-D3-A2J6-06	1	448
TCGA-D3-A2J7-06	1	13
TCGA-D3-A2J8-06	1	1737
TCGA-D3-A2J9-06	1	231
TCGA-D3-A2JA-06	1	40
TCGA-D3-A2JB-06
TCGA-D3-A2JC-06	0	2639
TCGA-D3-A2JD-06	1	85
TCGA-D3-A2JE-06	1	149
TCGA-D3-A2JF-06	1	25
TCGA-D3-A2JG-06	1	3279
TCGA-D3-A2JH-06	1	569
TCGA-D3-A2JK-06	1	261
TCGA-D3-A2JL-06	1	2638
TCGA-D3-A2JN-06	0	2022
TCGA-D3-A2JO-06	1	50
TCGA-D3-A2JP-06	1	227
TCGA-D3-A3BZ-06	1	2340
TCGA-D3-A3C1-06	0
TCGA-D3-A3C3-06	0
TCGA-D3-A3C6-06	1	1441
TCGA-D3-A3C7-06	0	1429
TCGA-D3-A3C8-06	1	55
TCGA-D3-A3CB-06	0	5065
TCGA-D3-A3CC-06	1	96
TCGA-D3-A3CE-06	1	0
TCGA-D3-A3CF-06	1	129
TCGA-D3-A3ML-06	1	32
TCGA-D3-A3MO-06	1	47
TCGA-D3-A3MR-06	1	3108
TCGA-D3-A3MU-06	1	750
TCGA-D3-A3MV-06	1	16
TCGA-D3-A51E-06	0	5318
TCGA-D3-A51F-06	0	1695
TCGA-D3-A51G-06
TCGA-D3-A51H-06	1	838
TCGA-D3-A51J-06	1	2008
TCGA-D3-A51K-06	0	1002
TCGA-D3-A51N-06	1	18
TCGA-D3-A51R-06	1	1016
TCGA-D3-A51T-06	1	210
TCGA-D3-A5GL-06	1	1092
TCGA-D3-A5GN-06	1	1279
TCGA-D3-A5GO-06	1	757
TCGA-D3-A5GR-06	1	0
TCGA-D3-A5GS-06	1	44
TCGA-D3-A5GT-01	1	291
TCGA-D3-A5GU-06	1	3074
TCGA-D3-A8GB-06	1	347
TCGA-D3-A8GC-06	1	1859
TCGA-D3-A8GD-06	1	147
TCGA-D3-A8GE-06	1	59
TCGA-D3-A8GI-06	1	50
TCGA-D3-A8GJ-06	1	1443
TCGA-D3-A8GK-06	1	1555
TCGA-D3-A8GL-06	1	1333
TCGA-D3-A8GM-06	0	3259
TCGA-D3-A8GN-06	1	787
TCGA-D3-A8GO-06	1
TCGA-D3-A8GP-06	1	535
TCGA-D3-A8GQ-06	1	578
TCGA-D3-A8GR-06
TCGA-D3-A8GS-06	1	2641
TCGA-D3-A8GV-06	1	3896
TCGA-D9-A148-06	1	4287
TCGA-D9-A149-06	1	1290
TCGA-D9-A1JW-06	1	10
TCGA-D9-A1JX-06	1	195
TCGA-D9-A1X3-06	0	551
TCGA-D9-A1X3-01	0	551
TCGA-D9-A3Z1-06	1	335
TCGA-D9-A3Z3-06	0	678
TCGA-D9-A3Z4-01	1	192
TCGA-D9-A4Z2-01	1	80
TCGA-D9-A4Z3-01	1	100
TCGA-D9-A4Z5-01	0	218
TCGA-D9-A4Z6-06	1	213
TCGA-D9-A6E9-06	0	301
TCGA-D9-A6EA-06	0	766
TCGA-D9-A6EC-06	0	2359
TCGA-D9-A6EG-06	1	398
TCGA-DA-A1HV-06	1	866
TCGA-DA-A1HW-06	1	852
TCGA-DA-A1HY-06	0	4407
TCGA-DA-A1I0-06	1	599
TCGA-DA-A1I1-06	1	5591
TCGA-DA-A1I2-06	1	4679
TCGA-DA-A1I4-06	1	889
TCGA-DA-A1I5-06	0	4107
TCGA-DA-A1I7-06	1	755
TCGA-DA-A1I8-06	1	961
TCGA-DA-A1IA-06	1	2005
TCGA-DA-A1IB-06	1	243
TCGA-DA-A1IC-06	1	1930
TCGA-DA-A3F2-06	1	430
TCGA-DA-A3F3-06	1	319
TCGA-DA-A3F5-06	1	6841
TCGA-DA-A3F8-06	0	1319
TCGA-DA-A95V-06	0	2193
TCGA-DA-A95W-06	0	1136
TCGA-DA-A95X-06	0	2249
TCGA-DA-A95Y-06	1	338
TCGA-DA-A95Z-06	0	396
TCGA-DA-A960-01	0	804
TCGA-EB-A1NK-01	0	1039
TCGA-EB-A24C-01	1	465
TCGA-EB-A24D-01	1	500
TCGA-EB-A299-01	0	378
TCGA-EB-A3HV-01	0	39
TCGA-EB-A3XB-01	0	796
TCGA-EB-A3XC-01	1	74
TCGA-EB-A3XD-01	0	1160
TCGA-EB-A3XE-01	0	180
TCGA-EB-A3XF-01	0	278
TCGA-EB-A3Y6-01	0	126
TCGA-EB-A3Y7-01	0	326
TCGA-EB-A41A-01	0	262
TCGA-EB-A41B-01	0	291
TCGA-EB-A42Y-01	1	721
TCGA-EB-A42Z-01	0	441
TCGA-EB-A430-01	0	0
TCGA-EB-A431-01	0	568
TCGA-EB-A44N-01	1	115
TCGA-EB-A44O-01	1	60
TCGA-EB-A44P-01	0	741
TCGA-EB-A44Q-06	0	422
TCGA-EB-A44R-06	0	315
TCGA-EB-A4IQ-01	1	337
TCGA-EB-A4IS-01	0	774
TCGA-EB-A4OY-01	0	977
TCGA-EB-A4OZ-01	0	620
TCGA-EB-A4P0-01	0	326
TCGA-EB-A4XL-01	0	777
TCGA-EB-A51B-01	0	931
TCGA-EB-A550-01	0	264
TCGA-EB-A551-01	0	590
TCGA-EB-A553-01	0	226
TCGA-EB-A57M-01	0	472
TCGA-EB-A5FP-01	1	24
TCGA-EB-A5KH-06	0	619
TCGA-EB-A5SE-01	1	367
TCGA-EB-A5SF-01	0	369
TCGA-EB-A5SG-06	1	1372
TCGA-EB-A5SH-06	1	1065
TCGA-EB-A5UL-06	0	891
TCGA-EB-A5UM-01	0	779
TCGA-EB-A5UN-06	1	1689
TCGA-EB-A5VU-01	1	217
TCGA-EB-A5VV-06	0	214
TCGA-EB-A6L9-06	0	1109
TCGA-EB-A6QY-01	1	36
TCGA-EB-A6QZ-01	1	129
TCGA-EB-A6R0-01	0	608
TCGA-EB-A82B-01	0	390
TCGA-EB-A82C-01	0	17
TCGA-EB-A85I-01	0	362
TCGA-EB-A85J-01	1	138
TCGA-EB-A97M-01	0	414
TCGA-EE-A17X-06	1	531
TCGA-EE-A17Y-06	1	317
TCGA-EE-A17Z-06	1	138
TCGA-EE-A180-06	1	850
TCGA-EE-A181-06	1	788
TCGA-EE-A182-06	1	270
TCGA-EE-A183-06
TCGA-EE-A184-06	1	1309
TCGA-EE-A185-06	1	85
TCGA-EE-A20B-06	0	4070
TCGA-EE-A20C-06
TCGA-EE-A20F-06	0	2785
TCGA-EE-A20H-06	1	4667
TCGA-EE-A20I-06	1	53
TCGA-EE-A29A-06	1	867
TCGA-EE-A29B-06	1	490
TCGA-EE-A29C-06	1	204
TCGA-EE-A29D-06	0	425
TCGA-EE-A29E-06	0	1940
TCGA-EE-A29G-06	1	726
TCGA-EE-A29H-06	1	1231
TCGA-EE-A29L-06	1	55
TCGA-EE-A29M-06	0	1729
TCGA-EE-A29N-06	1	478
TCGA-EE-A29P-06	1	1668
TCGA-EE-A29Q-06	1	1256
TCGA-EE-A29R-06	1	426
TCGA-EE-A29S-06	1	1418
TCGA-EE-A29T-06	1	7483
TCGA-EE-A29V-06	1	96
TCGA-EE-A29W-06
TCGA-EE-A29X-06	1	391
TCGA-EE-A2A0-06	1	1247
TCGA-EE-A2A1-06	1	3488
TCGA-EE-A2A2-06	0	1814
TCGA-EE-A2A5-06	1	1028
TCGA-EE-A2A6-06	1	1505
TCGA-EE-A2GB-06	0	1803
TCGA-EE-A2GC-06	0	2051
TCGA-EE-A2GD-06	1	3689
TCGA-EE-A2GE-06	1	5276
TCGA-EE-A2GH-06	0	6699
TCGA-EE-A2GI-06	0	1482
TCGA-EE-A2GJ-06	1	733
TCGA-EE-A2GK-06	1	1498
TCGA-EE-A2GL-06	1	2329
TCGA-EE-A2GM-06	1	1218
TCGA-EE-A2GN-06	1	2422
TCGA-EE-A2GO-06	1	2216
TCGA-EE-A2GP-06	1	251
TCGA-EE-A2GR-06	1	1301
TCGA-EE-A2GS-06	1	1565
TCGA-EE-A2GT-06	1	281
TCGA-EE-A2GU-06	0	2884
TCGA-EE-A2M5-06	1	537
TCGA-EE-A2M6-06	0	3932
TCGA-EE-A2M7-06	1	799
TCGA-EE-A2M8-06	1	498
TCGA-EE-A2MC-06	1	896
TCGA-EE-A2MD-06	1	1344
TCGA-EE-A2ME-06	1	2703
TCGA-EE-A2MF-06	1	8071
TCGA-EE-A2MG-06	1	2585
TCGA-EE-A2MH-06	1	440
TCGA-EE-A2MI-06	1	2673
TCGA-EE-A2MJ-06	1	396
TCGA-EE-A2MK-06	0	5487
TCGA-EE-A2ML-06	1	4983
TCGA-EE-A2MM-06	1	1357
TCGA-EE-A2MN-06	1	969
TCGA-EE-A2MP-06	1	365
TCGA-EE-A2MQ-06	1	986
TCGA-EE-A2MR-06	1	3136
TCGA-EE-A2MS-06	1	1883
TCGA-EE-A2MT-06	0	2166
TCGA-EE-A2MU-06	0	1620
TCGA-EE-A3AA-06	0	3781
TCGA-EE-A3AB-06	0	3733
TCGA-EE-A3AC-06	0	1948
TCGA-EE-A3AD-06	1	554
TCGA-EE-A3AE-06	0	1658
TCGA-EE-A3AF-06	1	201
TCGA-EE-A3AG-06	1	229
TCGA-EE-A3AH-06	1	1981
TCGA-EE-A3J3-06	1	4523
TCGA-EE-A3J4-06	1	1429
TCGA-EE-A3J5-06	1	467
TCGA-EE-A3J7-06	1	1270
TCGA-EE-A3J8-06	1	1035
TCGA-EE-A3JA-06	1	539
TCGA-EE-A3JB-06	1	1434
TCGA-EE-A3JD-06	1	364
TCGA-EE-A3JE-06	1	194
TCGA-EE-A3JH-06	1	537
TCGA-EE-A3JI-06	1	725
TCGA-ER-A193-06	1	806
TCGA-ER-A194-01	1	1354
TCGA-ER-A195-06	1	1078
TCGA-ER-A196-01	0	1785
TCGA-ER-A197-06	1	110
TCGA-ER-A198-06	1	0
TCGA-ER-A199-06	1	119
TCGA-ER-A19A-06	1	1617
TCGA-ER-A19B-06	1	829
TCGA-ER-A19C-06	1	1487
TCGA-ER-A19D-06	1	357
TCGA-ER-A19E-06	1	64
TCGA-ER-A19F-06	0	802
TCGA-ER-A19G-06	0	9188
TCGA-ER-A19H-06	0	4634
TCGA-ER-A19J-06	1	98
TCGA-ER-A19K-01	1	211
TCGA-ER-A19L-06	1	3689
TCGA-ER-A19M-06	1	1152
TCGA-ER-A19N-06	1	0
TCGA-ER-A19O-06	1	308
TCGA-ER-A19P-06	1	4352
TCGA-ER-A19Q-06	1	1259
TCGA-ER-A19S-06	0	1505
TCGA-ER-A19T-06	1	118
TCGA-ER-A19T-01	1	118
TCGA-ER-A19W-06	1	4126
TCGA-ER-A1A1-06	1	1971
TCGA-ER-A2NB-01	1	461
TCGA-ER-A2NC-06	1	1157
TCGA-ER-A2ND-06	1	710
TCGA-ER-A2NE-06
TCGA-ER-A2NF-06	1	230
TCGA-ER-A2NF-01	1	230
TCGA-ER-A2NG-06	1	766
TCGA-ER-A2NH-06	0	1264
TCGA-ER-A3ES-06	1	7514
TCGA-ER-A3ET-06	1	2435
TCGA-ER-A3EV-06	1	728
TCGA-ER-A3PL-06	1	945
TCGA-ER-A42H-01	1	259
TCGA-ER-A42K-06	1	206
TCGA-ER-A42L-06	1	3812
TCGA-FR-A2OS-01	1	283
TCGA-FR-A3R1-01	1	678
TCGA-FR-A3YN-06	0	2828
TCGA-FR-A3YO-06	0
TCGA-FR-A44A-06	0	5299
TCGA-FR-A69P-06	1	274
TCGA-FR-A726-01	1	273
TCGA-FR-A728-01	1	64
TCGA-FR-A729-06	1	6299
TCGA-FR-A7U8-06	1	567
TCGA-FR-A7U9-06	1	95
TCGA-FR-A7UA-06	0	1164
TCGA-FR-A8YC-06	1	1059
TCGA-FR-A8YD-06	1	1103
TCGA-FR-A8YE-06	0	3176
TCGA-FS-A1YW-06	1	6598
TCGA-FS-A1YX-06	1	1478
TCGA-FS-A1YY-06	1	6777
TCGA-FS-A1Z0-06	1	5503
TCGA-FS-A1Z3-06	1	276
TCGA-FS-A1Z4-06	1	854
TCGA-FS-A1Z7-06	1	136
TCGA-FS-A1ZA-06	1	663
TCGA-FS-A1ZB-06	1	1461
TCGA-FS-A1ZC-06	1	10334
TCGA-FS-A1ZD-06	1	1497
TCGA-FS-A1ZE-06	1	761
TCGA-FS-A1ZF-06	1	470
TCGA-FS-A1ZG-06	1	140
TCGA-FS-A1ZH-06	1	577
TCGA-FS-A1ZJ-06	1	1225
TCGA-FS-A1ZK-06	1	367
TCGA-FS-A1ZM-06	0	3080
TCGA-FS-A1ZN-01	1	361
TCGA-FS-A1ZP-06	1	2273
TCGA-FS-A1ZQ-06	1	3940
TCGA-FS-A1ZR-06	1	152
TCGA-FS-A1ZS-06	1	2861
TCGA-FS-A1ZT-06	0	1617
TCGA-FS-A1ZU-06	1	679
TCGA-FS-A1ZW-06	0	1505
TCGA-FS-A1ZY-06	1	824
TCGA-FS-A1ZZ-06	1	822
TCGA-FS-A4F0-06	1	872
TCGA-FS-A4F2-06	1	1525
TCGA-FS-A4F4-06	1	2028
TCGA-FS-A4F5-06	1	874
TCGA-FS-A4F8-06	1	5318
TCGA-FS-A4F9-06	1	376
TCGA-FS-A4FB-06	1	813
TCGA-FS-A4FC-06	1	1655
TCGA-FS-A4FD-06	1	2010
TCGA-FW-A3I3-06	0	531
TCGA-FW-A3R5-06	0	1124
TCGA-FW-A3R5-11	0	1124
TCGA-FW-A3TU-06	1	1691
TCGA-FW-A3TV-06	1	139
TCGA-FW-A5DX-01	0	640
TCGA-FW-A5DY-06	0	587
TCGA-GF-A2C7-01	0	21
TCGA-GF-A3OT-06	1	248
TCGA-GF-A4EO-06	0	591
TCGA-GF-A6C8-06	0	62
TCGA-GF-A6C9-06	0	480
TCGA-GF-A769-01	1	1070
TCGA-GN-A262-06	1	2908
TCGA-GN-A263-01	1	39
TCGA-GN-A264-06	1	3221
TCGA-GN-A265-06	1	99
TCGA-GN-A266-06	1	109
TCGA-GN-A267-06	1	456
TCGA-GN-A268-06	1	908
TCGA-GN-A269-01	1	170
TCGA-GN-A26A-06	1	750
TCGA-GN-A26C-01	1	593
TCGA-GN-A26D-06	1	622
TCGA-GN-A4U3-06	1	2274
TCGA-GN-A4U4-06	1	217
TCGA-GN-A4U5-01	0	1156
TCGA-GN-A4U7-06	1	183
TCGA-GN-A4U8-06	0	1487
TCGA-GN-A4U8-11	0	1487
TCGA-GN-A4U9-06	1	151
TCGA-GN-A8LK-06	1	436
TCGA-GN-A8LL-06	1	650
TCGA-GN-A8LN-01	1	186
TCGA-GN-A9SD-06	1	1137
TCGA-HR-A2OG-06	0	7
TCGA-HR-A2OG-01	0	7
TCGA-HR-A2OH-06	1	2004
TCGA-HR-A2OH-01	1	2004
TCGA-HR-A5NC-01	1	154
TCGA-IH-A3EA-01	1	314
TCGA-LH-A9QB-06	0	11217
TCGA-OD-A75X-06	1	8987
TCGA-QB-A6FS-06	1	63
TCGA-QB-AA9O-06	1	549
TCGA-RP-A690-06	0	6
TCGA-RP-A693-06	0	10
TCGA-RP-A694-06	0	21
TCGA-RP-A695-06	0
TCGA-RP-A6K9-06	0
TCGA-W3-A824-06	1	2406
TCGA-W3-A825-06	1	1917
TCGA-W3-A828-06	0	3683
TCGA-W3-AA1O-06	1	122
TCGA-W3-AA1Q-06	1	1066
TCGA-W3-AA1R-06	1	1037
TCGA-W3-AA1V-06	1	1219
TCGA-W3-AA1W-06	1	335
TCGA-W3-AA21-06	1	2952
TCGA-WE-A8JZ-06	0	731
TCGA-WE-A8K1-06	0	1492
TCGA-WE-A8K4-01	0	614
TCGA-WE-A8K5-06	1	1498
TCGA-WE-A8K6-06	1	256
TCGA-WE-A8ZM-06	1	646
TCGA-WE-A8ZN-06	1	1449
TCGA-WE-A8ZO-06	1	1371
TCGA-WE-A8ZQ-06	1	1757
TCGA-WE-A8ZR-06	1	126
TCGA-WE-A8ZT-06	1	69
TCGA-WE-A8ZX-06	1	326
TCGA-WE-A8ZY-06	1	1389
TCGA-WE-AA9Y-06	0	370
TCGA-WE-AAA0-06	1	650
TCGA-WE-AAA3-06	0	651
TCGA-WE-AAA4-06	1	523
TCGA-XV-A9VZ-01	0	11
TCGA-XV-A9W2-01	0	417
TCGA-XV-A9W5-01	0	392
TCGA-XV-AAZV-01	0	412
TCGA-XV-AAZW-01	1	393
TCGA-XV-AAZY-01	0	405
TCGA-XV-AB01-06	0	403
TCGA-XV-AB01-01	0	403
TCGA-YD-A89C-06	0	210
TCGA-YD-A9TA-06	0	1496
TCGA-YD-A9TB-06	0
TCGA-YG-AA3N-01	0	306
TCGA-YG-AA3O-06	1	999
TCGA-YG-AA3P-06	0	439
TCGA-Z2-A8RT-06	0	839
TCGA-Z2-AA3S-06	1	2727
TCGA-Z2-AA3V-06	0	486

## Sheet: TCGA_ACC_OS
svdata	time	event
TCGA-OR-A5KZ-01	125	1
TCGA-OR-A5LC-01	159	1
TCGA-P6-A5OF-01	207	1
TCGA-OR-A5K9-01	344	1
TCGA-OR-A5J5-01	365	1
TCGA-P6-A5OG-01	383	1
TCGA-OR-A5JS-01	383	0
TCGA-OR-A5KY-01	391	1
TCGA-OR-A5JP-01	464	0
TCGA-OR-A5J7-01	490	1
TCGA-OR-A5JJ-01	490	1
TCGA-OR-A5K5-01	498	1
TCGA-OR-A5JG-01	541	1
TCGA-OR-A5LT-01	549	0
TCGA-OR-A5JB-01	551	1
TCGA-OR-A5JY-01	552	1
TCGA-OR-A5JM-01	562	1
TCGA-OR-A5J8-01	579	1
TCGA-PK-A5H9-01	616	0
TCGA-OR-A5LE-01	662	1
TCGA-OR-A5LA-01	719	0
TCGA-OR-A5K8-01	749	0
TCGA-PA-A5YG-01	756	0
TCGA-OR-A5JZ-01	822	0
TCGA-OR-A5LR-01	853	0
TCGA-OR-A5L6-01	861	0
TCGA-OR-A5L9-01	871	0
TCGA-OR-A5L8-01	885	0
TCGA-OR-A5JT-01	907	0
TCGA-OR-A5JA-01	922	1
TCGA-OR-A5JX-01	950	0
TCGA-OR-A5L4-01	967	0
TCGA-OR-A5K2-01	994	1
TCGA-OR-A5K0-01	1029	0
TCGA-OR-A5K4-01	1082	0
TCGA-OR-A5LS-01	1096	0
TCGA-OR-A5JQ-01	1103	0
TCGA-OR-A5LJ-01	1105	1
TCGA-OU-A5PI-01	1171	0
TCGA-OR-A5JO-01	1194	0
TCGA-OR-A5LD-01	1197	1
TCGA-PK-A5HA-01	1201	0
TCGA-OR-A5LB-01	1204	1
TCGA-PK-A5HB-01	1293	0
TCGA-OR-A5L5-01	1317	0
TCGA-OR-A5J9-01	1352	0
TCGA-OR-A5J1-01	1355	1
TCGA-OR-A5KX-01	1364	0
TCGA-OR-A5KO-01	1414	0
TCGA-OR-A5K6-01	1493	0
TCGA-OR-A5JK-01	1497	0
TCGA-OR-A5LG-01	1589	0
TCGA-OR-A5LL-01	1613	1
TCGA-OR-A5J2-01	1677	1
TCGA-OR-A5JC-01	1750	1
TCGA-OR-A5LP-01	1857	0
TCGA-OR-A5LM-01	1858	0
TCGA-OR-A5JF-01	2015	0
TCGA-OR-A5JV-01	2023	0
TCGA-OR-A5JL-01	2056	0
TCGA-OR-A5KW-01	2076	0
TCGA-OR-A5J3-01	2091	0
TCGA-OR-A5JE-01	2105	1
TCGA-OR-A5JW-01	2202	0
TCGA-OR-A5JI-01	2331	0
TCGA-OR-A5LN-01	2342	0
TCGA-OR-A5LH-01	2385	1
TCGA-OR-A5LO-01	2405	1
TCGA-OR-A5J6-01	2703	0
TCGA-OR-A5LK-01	2740	0
TCGA-OR-A5KT-01	2895	0
TCGA-OR-A5JD-01	3038	0
TCGA-OR-A5K1-01	3289	0
TCGA-OR-A5K3-01	3465	0
TCGA-PK-A5H8-01	3623	0
TCGA-OR-A5JR-01	3688	0
TCGA-OR-A5KV-01	3878	0
TCGA-OR-A5L3-01	4628	0
TCGA-OR-A5KU-01	4673	0

## Sheet: TCGA_BLCA_OS
svdata	time	event
TCGA-E7-A8O8-01	13	0
TCGA-GC-A4ZW-01	15	0
TCGA-E7-A5KE-01	17	0
TCGA-4Z-AA80-01	19	1
TCGA-YC-A9TC-01	20	1
TCGA-E7-A5KF-01	20	0
TCGA-E7-A7DU-01	28	0
TCGA-KQ-A41S-01	35	0
TCGA-E7-A7DV-01	37	0
TCGA-H4-A2HO-01	46	0
TCGA-K4-A6FZ-01	55	0
TCGA-CU-A5W6-01	56	1
TCGA-S5-A6DX-01	56	1
TCGA-XF-A8HH-01	57	1
TCGA-C4-A0F0-01	59	0
TCGA-C4-A0F7-01	62	1
TCGA-XF-A9T6-01	64	0
TCGA-GD-A3OP-01	64	0
TCGA-DK-A1A5-01	65	1
TCGA-GD-A6C6-01	67	0
TCGA-XF-A9T3-01	68	0
TCGA-E7-A4XJ-01	68	1
TCGA-FD-A6TF-01	69	1
TCGA-5N-A9KI-01	76	1
TCGA-BL-A13J-01	81	1
TCGA-FD-A62N-01	82	0
TCGA-K4-A4AB-01	84	1
TCGA-ZF-AA4N-01	88	1
TCGA-C4-A0F1-01	89	0
TCGA-XF-AAMT-01	90	1
TCGA-FD-A6TG-01	93	1
TCGA-GD-A3OQ-01	95	0
TCGA-XF-A9SJ-01	98	1
TCGA-FT-A3EE-01	99	1
TCGA-K4-A3WU-01	105	0
TCGA-ZF-A9RE-01	106	1
TCGA-FD-A43X-01	110	0
TCGA-UY-A9PF-01	117	0
TCGA-XF-AAN8-01	118	1
TCGA-FD-A3B7-01	122	1
TCGA-XF-A9ST-01	128	1
TCGA-E7-A6MD-01	129	0
TCGA-FD-A6TH-01	131	1
TCGA-BT-A3PH-01	142	1
TCGA-GU-A767-01	144	1
TCGA-DK-A3IK-01	146	1
TCGA-CU-A0YO-01	149	1
TCGA-BT-A20V-01	154	1
TCGA-BT-A20R-01	154	1
TCGA-CU-A3QU-01	158	0
TCGA-FD-A5BV-01	163	1
TCGA-E7-A3Y1-01	163	0
TCGA-FD-A3SO-01	168	1
TCGA-ZF-AA5N-01	168	1
TCGA-FD-A5BX-01	173	1
TCGA-XF-A9SU-01	182	1
TCGA-FD-A6TC-01	187	0
TCGA-UY-A9PE-01	189	0
TCGA-FD-A62P-01	191	1
TCGA-BT-A0S7-01	200	1
TCGA-XF-A8HC-01	200	1
TCGA-BL-A3JM-01	205	1
TCGA-XF-AAMX-01	206	1
TCGA-G2-AA3C-01	211	1
TCGA-GU-AATQ-01	213	1
TCGA-FD-A62O-01	216	1
TCGA-G2-A3IB-01	220	1
TCGA-BL-A13I-01	223	1
TCGA-GD-A76B-01	224	1
TCGA-GU-A762-01	232	1
TCGA-XF-AAML-01	232	1
TCGA-DK-A2I2-01	237	1
TCGA-E7-A97Q-01	246	1
TCGA-DK-A3IM-01	248	1
TCGA-DK-A3IN-01	250	1
TCGA-FD-A5BY-01	251	0
TCGA-BT-A20X-01	251	1
TCGA-XF-AAMW-01	253	1
TCGA-BT-A20W-01	254	1
TCGA-2F-A9KW-01	254	1
TCGA-GV-A3QH-01	258	1
TCGA-ZF-AA56-01	259	1
TCGA-GV-A40E-01	261	1
TCGA-ZF-AA4U-01	262	1
TCGA-FJ-A871-01	272	1
TCGA-FD-A3B5-01	272	1
TCGA-C4-A0EZ-01	273	1
TCGA-HQ-A5ND-01	274	1
TCGA-K4-A5RH-01	276	0
TCGA-K4-A4AC-01	278	1
TCGA-YC-A8S6-01	293	0
TCGA-DK-A3IV-01	294	1
TCGA-FD-A6TI-01	294	1
TCGA-BT-A3PK-01	303	1
TCGA-4Z-AA86-01	311	1
TCGA-DK-A3WX-01	321	1
TCGA-FJ-A3ZE-01	324	1
TCGA-GU-AATO-01	324	1
TCGA-FD-A5BT-01	328	1
TCGA-FD-A6TK-01	330	0
TCGA-GU-A42P-01	332	1
TCGA-CF-A47S-01	333	0
TCGA-FT-A61P-01	337	0
TCGA-DK-AA75-01	340	1
TCGA-XF-AAMH-01	344	1
TCGA-GU-A42Q-01	344	1
TCGA-CF-A8HY-01	345	0
TCGA-CF-A8HX-01	345	0
TCGA-K4-A5RI-01	356	1
TCGA-K4-AAQO-01	359	0
TCGA-CF-A9FF-01	361	0
TCGA-KQ-A41Q-01	361	0
TCGA-XF-A9SW-01	362	1
TCGA-YF-AA3L-01	364	0
TCGA-2F-A9KP-01	364	1
TCGA-CF-A5UA-01	365	0
TCGA-DK-AA76-01	366	0
TCGA-CF-A47W-01	368	0
TCGA-CF-A7I0-01	368	0
TCGA-CF-A3MG-01	369	0
TCGA-HQ-A5NE-01	370	1
TCGA-BT-A20O-01	370	1
TCGA-CF-A3MI-01	370	0
TCGA-PQ-A6FI-01	372	0
TCGA-ZF-AA5P-01	372	0
TCGA-CF-A47Y-01	373	0
TCGA-FD-A6TE-01	376	0
TCGA-BL-A5ZZ-01	377	0
TCGA-CF-A47V-01	379	0
TCGA-CF-A1HS-01	382	0
TCGA-CF-A3MF-01	383	0
TCGA-CF-A47X-01	384	0
TCGA-FD-A3B8-01	384	0
TCGA-FJ-A3Z9-01	385	1
TCGA-CF-A47T-01	385	1
TCGA-FD-A6TD-01	386	1
TCGA-XF-A9SV-01	388	1
TCGA-CF-A1HR-01	389	0
TCGA-FD-A3SS-01	391	1
TCGA-CU-A0YN-01	393	1
TCGA-E7-A85H-01	394	0
TCGA-CF-A3MH-01	398	0
TCGA-CF-A9FM-01	398	0
TCGA-CF-A5U8-01	399	0
TCGA-BT-A0YX-01	400	1
TCGA-FD-A62S-01	406	1
TCGA-ZF-A9RD-01	408	1
TCGA-MV-A51V-01	410	0
TCGA-CU-A72E-01	413	1
TCGA-DK-A3IL-01	413	1
TCGA-DK-AA6Q-01	413	1
TCGA-DK-AA6W-01	415	1
TCGA-YF-AA3M-01	415	0
TCGA-DK-AA71-01	415	0
TCGA-E7-A7PW-01	416	0
TCGA-XF-A9T8-01	418	1
TCGA-CF-A27C-01	425	0
TCGA-E7-A7XN-01	428	0
TCGA-GC-A3RD-01	428	0
TCGA-R3-A69X-01	433	0
TCGA-GV-A3JV-01	434	1
TCGA-E7-A97P-01	437	1
TCGA-BT-A20T-01	453	1
TCGA-XF-A9SP-01	454	1
TCGA-BT-A20U-01	455	1
TCGA-FD-A43S-01	455	0
TCGA-DK-AA6P-01	457	0
TCGA-4Z-AA84-01	460	0
TCGA-CU-A0YR-01	460	1
TCGA-LC-A66R-01	466	0
TCGA-E7-A8O7-01	466	0
TCGA-DK-AA6X-01	467	0
TCGA-XF-A8HG-01	467	1
TCGA-E5-A4TZ-01	467	1
TCGA-K4-A6MB-01	469	0
TCGA-LT-A5Z6-01	474	0
TCGA-FD-A43Y-01	474	1
TCGA-DK-A1AG-01	475	0
TCGA-DK-A6B2-01	477	0
TCGA-GU-A766-01	480	0
TCGA-GC-A3OO-01	481	0
TCGA-GC-A3RC-01	484	0
TCGA-G2-A2EK-01	485	0
TCGA-XF-A9SK-01	486	1
TCGA-DK-A1AE-01	491	0
TCGA-BT-A2LB-01	492	1
TCGA-XF-A9T4-01	495	1
TCGA-4Z-AA7M-01	495	0
TCGA-K4-A83P-01	495	0
TCGA-S5-AA26-01	503	0
TCGA-PQ-A6FN-01	507	0
TCGA-DK-A1AB-01	508	1
TCGA-E7-A519-01	508	0
TCGA-4Z-AA7Q-01	510	1
TCGA-FD-A3B4-01	510	1
TCGA-4Z-AA7O-01	512	0
TCGA-BT-A2LA-01	522	0
TCGA-4Z-AA7R-01	522	1
TCGA-FJ-A3ZF-01	524	0
TCGA-5N-A9KM-01	530	1
TCGA-G2-A3VY-01	536	0
TCGA-UY-A78K-01	536	1
TCGA-DK-A1AF-01	536	0
TCGA-DK-A3IQ-01	539	1
TCGA-K4-A5RJ-01	539	0
TCGA-GC-A3WC-01	540	0
TCGA-UY-A9PD-01	542	0
TCGA-BT-A20P-01	544	1
TCGA-XF-A8HI-01	544	1
TCGA-DK-A2I1-01	546	0
TCGA-FD-A3SM-01	547	1
TCGA-DK-A3X2-01	547	1
TCGA-FD-A5C0-01	550	1
TCGA-DK-A1A7-01	560	0
TCGA-CU-A3KJ-01	562	0
TCGA-CF-A9FL-01	565	1
TCGA-XF-AAN7-01	565	1
TCGA-FD-A6TB-01	572	0
TCGA-DK-AA6T-01	572	0
TCGA-YC-A89H-01	573	0
TCGA-XF-A9T2-01	575	1
TCGA-GU-A42R-01	577	1
TCGA-DK-A1AA-01	578	0
TCGA-DK-AA6U-01	578	0
TCGA-BT-A20J-01	579	1
TCGA-GV-A40G-01	580	0
TCGA-GV-A3JX-01	581	0
TCGA-GC-A3RB-01	582	0
TCGA-FD-A5BU-01	588	0
TCGA-H4-A2HQ-01	590	0
TCGA-ZF-AA54-01	590	1
TCGA-BT-A20Q-01	593	1
TCGA-ZF-AA4T-01	599	1
TCGA-FD-A3SR-01	602	1
TCGA-GV-A3JZ-01	603	0
TCGA-GU-A764-01	610	0
TCGA-G2-A3IE-01	612	1
TCGA-ZF-A9RN-01	615	1
TCGA-GV-A3QF-01	617	1
TCGA-DK-AA77-01	618	0
TCGA-BT-A2LD-01	623	1
TCGA-GC-A3I6-01	630	1
TCGA-DK-A3WW-01	633	0
TCGA-FD-A43U-01	636	0
TCGA-GD-A3OS-01	638	0
TCGA-XF-A9SY-01	640	0
TCGA-LT-A8JT-01	641	0
TCGA-ZF-A9R2-01	642	0
TCGA-K4-A3WV-01	646	0
TCGA-DK-A3IT-01	648	0
TCGA-GV-A3JW-01	649	0
TCGA-GC-A3BM-01	651	1
TCGA-ZF-A9R7-01	665	0
TCGA-DK-A1A3-01	665	1
TCGA-E7-A4IJ-01	674	1
TCGA-ZF-A9R0-01	680	1
TCGA-FD-A3N5-01	685	1
TCGA-UY-A78M-01	690	1
TCGA-GV-A6ZA-01	691	0
TCGA-G2-A2EC-01	696	1
TCGA-FD-A43N-01	699	0
TCGA-C4-A0F6-01	700	0
TCGA-DK-A3IU-01	706	1
TCGA-FD-A3SL-01	712	1
TCGA-XF-A9SX-01	719	1
TCGA-E7-A6ME-01	731	0
TCGA-2F-A9KO-01	734	1
TCGA-FD-A3SJ-01	739	1
TCGA-E7-A6MF-01	750	0
TCGA-GC-A3YS-01	758	0
TCGA-K4-A3WS-01	761	0
TCGA-ZF-A9R1-01	773	0
TCGA-E7-A541-01	778	1
TCGA-FD-A3SP-01	783	0
TCGA-BT-A3PJ-01	789	0
TCGA-BT-A20N-01	795	1
TCGA-E7-A678-01	798	0
TCGA-XF-A9T0-01	799	0
TCGA-GD-A2C5-01	812	0
TCGA-FD-A5BR-01	813	0
TCGA-G2-A2EL-01	819	1
TCGA-E7-A677-01	820	0
TCGA-XF-AAN4-01	823	1
TCGA-GV-A3QK-01	832	0
TCGA-FD-A43P-01	832	0
TCGA-FD-A5BZ-01	835	1
TCGA-4Z-AA7W-01	840	0
TCGA-K4-A54R-01	842	0
TCGA-FD-A3N6-01	851	0
TCGA-XF-A9SZ-01	859	1
TCGA-BT-A42F-01	864	0
TCGA-ZF-A9R9-01	864	1
TCGA-BT-A42C-01	873	0
TCGA-FD-A3SN-01	887	0
TCGA-G2-AA3F-01	893	0
TCGA-ZF-AA5H-01	897	0
TCGA-UY-A9PB-01	899	0
TCGA-E7-A3X6-01	904	1
TCGA-CU-A3YL-01	906	0
TCGA-ZF-A9R4-01	921	0
TCGA-XF-AAN1-01	941	1
TCGA-FJ-A3Z7-01	945	0
TCGA-ZF-A9R3-01	949	1
TCGA-FD-A3B3-01	974	1
TCGA-GU-A763-01	997	0
TCGA-GU-AATP-01	1003	0
TCGA-G2-A2ES-01	1004	1
TCGA-FD-A3B6-01	1005	1
TCGA-SY-A9G0-01	1008	1
TCGA-4Z-AA89-01	1029	0
TCGA-ZF-AA4R-01	1036	1
TCGA-XF-A9SM-01	1048	0
TCGA-4Z-AA7S-01	1064	1
TCGA-UY-A9PA-01	1072	0
TCGA-ZF-AA52-01	1077	1
TCGA-ZF-A9R5-01	1090	0
TCGA-KQ-A41P-01	1094	0
TCGA-BT-A42E-01	1108	0
TCGA-GV-A3QI-01	1110	0
TCGA-DK-A6B6-01	1115	0
TCGA-UY-A78L-01	1127	0
TCGA-DK-AA6L-01	1163	1
TCGA-HQ-A2OE-01	1174	0
TCGA-E5-A4U1-01	1181	0
TCGA-SY-A9G5-01	1186	0
TCGA-BL-A0C8-01	1219	0
TCGA-4Z-AA81-01	1270	1
TCGA-E5-A2PC-01	1326	0
TCGA-XF-AAMZ-01	1348	1
TCGA-KQ-A41R-01	1350	0
TCGA-4Z-AA7N-01	1367	1
TCGA-XF-A8HB-01	1370	0
TCGA-DK-A2HX-01	1420	1
TCGA-FD-A3SQ-01	1423	1
TCGA-4Z-AA87-01	1454	0
TCGA-ZF-A9RM-01	1455	0
TCGA-G2-A2EJ-01	1460	0
TCGA-4Z-AA7Y-01	1522	0
TCGA-DK-A3IS-01	1529	0
TCGA-KQ-A41O-01	1538	0
TCGA-DK-A6B5-01	1542	0
TCGA-4Z-AA82-01	1556	1
TCGA-UY-A9PH-01	1561	0
TCGA-DK-AA6M-01	1582	0
TCGA-KQ-A41N-01	1604	0
TCGA-DK-A6AW-01	1621	0
TCGA-FD-A5BS-01	1639	0
TCGA-ZF-AA58-01	1649	0
TCGA-XF-AAMJ-01	1670	1
TCGA-DK-AA74-01	1708	0
TCGA-ZF-AA51-01	1714	0
TCGA-XF-AAN0-01	1718	1
TCGA-ZF-AA53-01	1761	0
TCGA-FD-A5C1-01	1792	0
TCGA-G2-A2EO-01	1804	1
TCGA-ZF-AA4V-01	1806	0
TCGA-ZF-AA4W-01	1830	0
TCGA-FD-A3NA-01	1845	0
TCGA-XF-AAN2-01	1869	1
TCGA-G2-A2EF-01	1884	0
TCGA-FD-A6TA-01	1912	0
TCGA-HQ-A2OF-01	1947	0
TCGA-ZF-A9RF-01	1949	0
TCGA-DK-A6AV-01	1952	0
TCGA-XF-A9SH-01	1971	1
TCGA-G2-AA3B-01	2008	0
TCGA-DK-A3X1-01	2009	0
TCGA-DK-A1A6-01	2020	0
TCGA-XF-A9SL-01	2020	1
TCGA-4Z-AA83-01	2024	0
TCGA-XF-A9T5-01	2027	0
TCGA-ZF-AA4X-01	2044	0
TCGA-DK-A6B1-01	2049	0
TCGA-UY-A8OB-01	2109	0
TCGA-G2-AA3D-01	2139	0
TCGA-XF-AAMQ-01	2177	0
TCGA-XF-AAN5-01	2293	0
TCGA-UY-A78O-01	2312	0
TCGA-DK-A6B0-01	2330	0
TCGA-2F-A9KT-01	2352	0
TCGA-UY-A78P-01	2380	0
TCGA-XF-A9SI-01	2423	0
TCGA-XF-AAN3-01	2625	0
TCGA-UY-A78N-01	2641	1
TCGA-DK-A2I6-01	2656	0
TCGA-ZF-A9RL-01	2703	0
TCGA-XF-AAMR-01	2790	0
TCGA-XF-AAME-01	2828	1
TCGA-ZF-A9RC-01	2868	0
TCGA-2F-A9KQ-01	2886	0
TCGA-XF-A8HF-01	2954	1
TCGA-XF-A8HD-01	2964	0
TCGA-XF-AAMY-01	3011	0
TCGA-2F-A9KR-01	3183	1
TCGA-XF-AAMG-01	3364	0
TCGA-DK-A1AD-01	3420	0
TCGA-UY-A8OD-01	3432	0
TCGA-XF-A8HE-01	3817	0
TCGA-DK-A2I4-01	3835	0
TCGA-DK-A1AC-01	3981	0
TCGA-DK-A3WY-01	4967	0
TCGA-DK-AA6R-01	5041	0
TCGA-DK-AA6S-01	5050	0

## Sheet: TCGA_BRCA_OS
svdata	time	event
TCGA-C8-A275-01	1	0
TCGA-BH-A1F8-01	1	1
TCGA-AC-A7VC-01	1	0
TCGA-AN-A0AM-01	5	0
TCGA-C8-A1HJ-01	5	0
TCGA-PL-A8LX-01	5	0
TCGA-AN-A041-01	7	0
TCGA-PL-A8LY-01	8	0
TCGA-AN-A0XP-01	9	0
TCGA-AN-A0AR-01	10	0
TCGA-AN-A0AT-01	10	0
TCGA-AN-A046-01	10	0
TCGA-AN-A0FV-01	10	0
TCGA-AN-A0FX-01	10	0
TCGA-AN-A0FZ-01	10	0
TCGA-AN-A03X-01	10	0
TCGA-AN-A0XR-01	10	0
TCGA-AN-A0FY-01	10	0
TCGA-AN-A0AS-01	10	0
TCGA-AN-A03Y-01	10	0
TCGA-AN-A0XT-01	10	0
TCGA-AN-A0XS-01	10	0
TCGA-AN-A0XN-01	10	0
TCGA-AN-A0XU-01	10	0
TCGA-AN-A0FW-01	11	0
TCGA-AN-A0G0-01	16	0
TCGA-AN-A049-01	19	0
TCGA-E9-A244-01	21	0
TCGA-E9-A5FL-01	24	0
TCGA-E9-A245-01	26	1
TCGA-A8-A08A-01	30	0
TCGA-A8-A0A7-01	30	0
TCGA-A8-A09W-01	30	0
TCGA-A8-A08L-01	30	1
TCGA-A8-A08R-01	30	0
TCGA-A8-A09C-01	31	0
TCGA-A8-A06Q-01	31	0
TCGA-A8-A09N-01	31	0
TCGA-A8-A06Z-01	31	0
TCGA-AC-A8OQ-01	34	0
TCGA-E9-A1RD-01	34	0
TCGA-AC-A8OR-01	40	0
TCGA-D8-A27P-01	49	0
TCGA-AC-A6NO-01	51	0
TCGA-AN-A04D-01	52	0
TCGA-AN-A04C-01	54	0
TCGA-E9-A248-01	59	0
TCGA-OK-A5Q2-01	64	0
TCGA-AC-A8OS-01	70	0
TCGA-BH-A0HL-01	72	0
TCGA-BH-A0HO-01	76	0
TCGA-E9-A1R3-01	78	0
TCGA-BH-A0DS-01	78	0
TCGA-AQ-A54N-01	78	0
TCGA-HN-A2NL-01	79	0
TCGA-LL-A6FQ-01	80	0
TCGA-AR-A24P-01	84	0
TCGA-AN-A04A-01	90	0
TCGA-E9-A1R5-01	92	0
TCGA-BH-A0DQ-01	98	0
TCGA-UU-A93S-01	116	1
TCGA-E2-A1IL-01	118	0
TCGA-BH-A0E0-01	134	0
TCGA-BH-A18G-01	149	0
TCGA-A2-A0CU-01	158	1
TCGA-BH-A6R9-01	160	0
TCGA-AR-A0TR-01	160	1
TCGA-AN-A0XV-01	162	0
TCGA-AN-A0XL-01	163	0
TCGA-BH-A0RX-01	170	0
TCGA-AN-A0XW-01	170	0
TCGA-AQ-A0Y5-01	172	1
TCGA-AN-A0FF-01	172	0
TCGA-BH-A0HK-01	178	0
TCGA-E9-A1R4-01	186	0
TCGA-EW-A1PC-01	187	0
TCGA-AN-A0FD-01	196	0
TCGA-AC-A3EH-01	197	1
TCGA-E9-A1RF-01	200	0
TCGA-AN-A0FS-01	210	0
TCGA-AN-A0FK-01	213	0
TCGA-AN-A0FT-01	214	0
TCGA-B6-A400-01	215	0
TCGA-LD-A7W5-01	216	0
TCGA-E9-A249-01	217	0
TCGA-AN-A0FN-01	218	0
TCGA-A2-A4RW-01	222	0
TCGA-BH-A18T-01	224	1
TCGA-AN-A0AK-01	224	0
TCGA-GI-A2C8-01	225	0
TCGA-AN-A0AL-01	227	0
TCGA-LL-A73Z-01	227	1
TCGA-AN-A0FL-01	231	0
TCGA-EW-A1P8-01	239	1
TCGA-AN-A0FJ-01	242	0
TCGA-A1-A0SM-01	242	0
TCGA-A8-A07S-01	243	0
TCGA-AC-A7VB-01	250	0
TCGA-E2-A56Z-01	252	0
TCGA-A2-A0T2-01	255	1
TCGA-EW-A1IY-01	258	0
TCGA-A1-A0SB-01	259	0
TCGA-E2-A1LK-01	266	1
TCGA-A7-A6VY-01	266	0
TCGA-OL-A97C-01	271	0
TCGA-A8-A07R-01	273	0
TCGA-A8-A09R-01	273	0
TCGA-A8-A079-01	274	0
TCGA-E2-A15K-06	275	0
TCGA-E2-A15K-01	275	0
TCGA-A7-A6VW-01	285	0
TCGA-BH-AB28-01	287	0
TCGA-E9-A2JT-01	288	0
TCGA-E2-A15O-01	289	0
TCGA-BH-A6R8-01	293	0
TCGA-BH-A0E6-01	293	0
TCGA-BH-A8FY-01	295	1
TCGA-C8-A278-01	297	0
TCGA-E9-A1NI-01	300	0
TCGA-D8-A1Y1-01	302	1
TCGA-PL-A8LZ-01	302	0
TCGA-5T-A9QA-01	303	0
TCGA-AN-A0AJ-01	303	0
TCGA-A8-A099-01	304	0
TCGA-A8-A07O-01	304	0
TCGA-A8-A07W-01	304	0
TCGA-A8-A09A-01	304	0
TCGA-D8-A27R-01	307	0
TCGA-A7-A6VV-01	313	0
TCGA-A7-A3J0-01	313	0
TCGA-A7-A6VX-01	317	0
TCGA-C8-A1HL-01	317	0
TCGA-EW-A1PE-01	320	0
TCGA-BH-A42T-01	320	1
TCGA-AR-A5QQ-01	322	1
TCGA-A2-A25F-01	322	0
TCGA-A7-A3IZ-01	322	0
TCGA-LD-A9QF-01	323	0
TCGA-A7-A5ZW-01	326	0
TCGA-BH-A0GZ-01	328	0
TCGA-C8-A1HF-01	332	0
TCGA-A8-A07P-01	334	0
TCGA-A7-A5ZX-01	336	0
TCGA-E2-A15M-01	336	1
TCGA-E2-A1IU-01	337	0
TCGA-E9-A1R6-01	339	0
TCGA-A7-A3J1-01	343	0
TCGA-C8-A1HI-01	343	0
TCGA-A7-A3IY-01	345	0
TCGA-C8-A1HG-01	345	0
TCGA-W8-A86G-01	347	0
TCGA-4H-AAAK-01	348	0
TCGA-AC-A62V-01	348	1
TCGA-AO-A1KS-01	350	0
TCGA-JL-A3YX-01	352	0
TCGA-C8-A12N-01	358	0
TCGA-C8-A12M-01	358	0
TCGA-C8-A12P-01	358	0
TCGA-JL-A3YW-01	360	0
TCGA-B6-A0I9-01	362	1
TCGA-C8-A12L-01	363	0
TCGA-A7-A426-01	364	0
TCGA-BH-A1EV-01	365	1
TCGA-A8-A0A1-01	365	0
TCGA-A8-A08I-01	365	0
TCGA-A8-A07J-01	365	0
TCGA-A8-A097-01	365	0
TCGA-A8-A09B-01	365	0
TCGA-D8-A1JF-01	366	0
TCGA-C8-A1HK-01	366	0
TCGA-A7-A5ZV-01	368	0
TCGA-C8-A130-01	370	0
TCGA-D8-A1JS-01	371	0
TCGA-EW-A1IW-01	371	0
TCGA-D8-A27W-01	373	0
TCGA-AC-A6IX-01	373	0
TCGA-AC-A6IX-06	373	0
TCGA-C8-A1HM-01	375	0
TCGA-C8-A1HE-01	375	0
TCGA-C8-A1HO-01	375	0
TCGA-AN-A0XO-01	375	0
TCGA-E9-A295-01	375	0
TCGA-C8-A26X-01	376	0
TCGA-LL-A7T0-01	376	0
TCGA-D8-A1XC-01	377	1
TCGA-C8-A137-01	379	0
TCGA-C8-A138-01	380	0
TCGA-C8-A8HQ-01	380	0
TCGA-D8-A27V-01	381	0
TCGA-C8-A26W-01	381	0
TCGA-C8-A12Z-01	382	0
TCGA-C8-A134-01	383	0
TCGA-C8-A132-01	383	0
TCGA-C8-A12W-01	385	0
TCGA-C8-A12V-01	385	0
TCGA-D8-A73W-01	385	1
TCGA-C8-A12X-01	385	0
TCGA-C8-A12Q-01	385	1
TCGA-C8-A12O-01	385	0
TCGA-C8-A12U-01	385	0
TCGA-BH-A0HU-01	392	0
TCGA-E2-A15H-01	393	0
TCGA-C8-A135-01	393	0
TCGA-C8-A3M8-01	394	0
TCGA-C8-A1HN-01	394	0
TCGA-LL-A5YM-01	394	0
TCGA-D8-A1XU-01	395	0
TCGA-A8-A0A4-01	396	0
TCGA-C8-A8HP-01	396	0
TCGA-A8-A06P-01	396	0
TCGA-A8-A086-01	396	0
TCGA-A8-A06O-01	396	0
TCGA-D8-A27H-01	397	0
TCGA-D8-A27T-01	398	0
TCGA-LD-A74U-01	402	0
TCGA-EW-A1J2-01	403	0
TCGA-D8-A140-01	403	0
TCGA-LD-A7W6-01	404	0
TCGA-D8-A1JT-01	405	0
TCGA-A7-A3RF-01	408	0
TCGA-C8-A8HR-01	408	0
TCGA-D8-A27G-01	409	0
TCGA-D8-A145-01	410	0
TCGA-D8-A27M-01	410	0
TCGA-C8-A131-01	411	0
TCGA-GM-A5PV-01	412	0
TCGA-AC-A6IW-01	413	0
TCGA-BH-A0HP-01	414	0
TCGA-A1-A0SJ-01	416	0
TCGA-AC-A62X-01	417	0
TCGA-A7-A4SB-01	418	0
TCGA-S3-AA11-01	421	0
TCGA-BH-A0DK-01	423	0
TCGA-S3-AA17-01	424	0
TCGA-EW-A1PD-01	424	0
TCGA-D8-A142-01	425	0
TCGA-D8-A1JH-01	426	0
TCGA-A8-A07I-01	426	0
TCGA-A8-A09X-01	426	1
TCGA-E2-A15S-01	428	0
TCGA-OL-A66P-01	428	0
TCGA-D8-A1Y3-01	430	0
TCGA-D8-A143-01	431	0
TCGA-D8-A1J8-01	431	0
TCGA-D8-A1Y2-01	433	0
TCGA-A1-A0SG-01	434	0
TCGA-BH-A0E2-01	435	0
TCGA-A1-A0SD-01	437	0
TCGA-D8-A27I-01	439	0
TCGA-C8-A27B-01	439	0
TCGA-EW-A1PF-01	439	0
TCGA-LL-A5YO-01	440	0
TCGA-LL-A740-01	441	0
TCGA-D8-A1XK-01	441	0
TCGA-A7-A4SD-01	441	0
TCGA-AC-A5EI-01	442	0
TCGA-A7-A4SC-01	446	0
TCGA-AC-A2QJ-01	446	1
TCGA-A7-A425-01	447	0
TCGA-LL-A5YN-01	447	0
TCGA-D8-A1JU-01	447	0
TCGA-A7-A56D-01	448	0
TCGA-D8-A1XG-01	448	0
TCGA-E2-A158-01	450	0
TCGA-LL-A5YP-01	450	0
TCGA-AC-A3OD-01	451	0
TCGA-AC-A3OD-01	451	0
TCGA-A7-A4SA-01	454	0
TCGA-AC-A5XU-01	455	0
TCGA-AC-A3TN-01	456	0
TCGA-A8-A09V-01	457	0
TCGA-A8-A084-01	458	0
TCGA-BH-A0H0-01	461	0
TCGA-D8-A1XV-01	461	0
TCGA-EW-A6S9-01	463	0
TCGA-D8-A1XF-01	463	0
TCGA-D8-A1XZ-01	466	0
TCGA-XX-A899-01	467	0
TCGA-BH-A18N-01	468	1
TCGA-C8-A26Z-01	470	0
TCGA-AC-A3W7-01	471	0
TCGA-D8-A1Y0-01	472	0
TCGA-AQ-A1H2-01	475	0
TCGA-BH-A0DP-01	476	0
TCGA-BH-A0E1-01	477	0
TCGA-EW-A1J5-01	477	0
TCGA-LL-A73Y-01	477	0
TCGA-D8-A1JC-01	480	0
TCGA-D8-A1XR-01	482	0
TCGA-XX-A89A-01	488	0
TCGA-D8-A27F-01	488	0
TCGA-LL-A6FR-01	489	0
TCGA-D8-A73U-01	492	0
TCGA-BH-A0DZ-01	495	0
TCGA-D8-A1XS-01	496	0
TCGA-AC-A3HN-01	496	0
TCGA-D8-A1XQ-01	499	0
TCGA-D8-A27L-01	499	0
TCGA-A2-A1G6-01	501	0
TCGA-E2-A1BC-01	501	0
TCGA-D8-A1JA-01	502	0
TCGA-D8-A1XY-01	503	0
TCGA-AC-A3W5-01	504	0
TCGA-EW-A1J3-01	504	0
TCGA-D8-A1XT-01	506	0
TCGA-C8-A274-01	508	0
TCGA-D8-A1X7-01	509	0
TCGA-EW-A6SA-01	510	0
TCGA-AC-A5EH-01	511	0
TCGA-C8-A273-01	513	0
TCGA-BH-A0HN-01	516	0
TCGA-A8-A075-01	518	0
TCGA-UL-AAZ6-01	518	0
TCGA-A8-A0AB-01	518	0
TCGA-LL-A5YL-01	519	0
TCGA-D8-A27N-01	519	0
TCGA-A2-A0T1-01	521	0
TCGA-D8-A1XD-01	522	0
TCGA-A2-A25C-01	523	0
TCGA-AR-A1AR-01	524	1
TCGA-S3-AA15-01	525	0
TCGA-E2-A15D-01	526	0
TCGA-OL-A66O-01	528	0
TCGA-A2-A1FW-01	528	0
TCGA-S3-AA14-01	529	0
TCGA-D8-A27E-01	530	0
TCGA-AC-A62Y-01	530	0
TCGA-A2-A0T5-01	531	0
TCGA-LL-A9Q3-01	532	0
TCGA-EW-A3U0-01	532	0
TCGA-D8-A1J9-01	532	0
TCGA-EW-A423-01	533	0
TCGA-A2-A0T0-01	533	0
TCGA-D8-A1XM-01	538	0
TCGA-BH-A1EY-01	538	1
TCGA-D8-A1X6-01	541	0
TCGA-AO-A1KT-01	541	0
TCGA-A7-A4SF-01	545	0
TCGA-A8-A093-01	546	0
TCGA-A8-A06R-01	547	0
TCGA-A2-A04P-01	548	1
TCGA-A8-A082-01	549	0
TCGA-GM-A5PX-01	551	0
TCGA-D8-A1JD-01	552	0
TCGA-D8-A1XB-01	552	0
TCGA-BH-A0BD-01	554	0
TCGA-E2-A15G-01	554	0
TCGA-A2-A0YE-01	554	0
TCGA-EW-A1IZ-01	554	0
TCGA-A1-A0SQ-01	554	0
TCGA-B6-A0WW-01	558	1
TCGA-EW-A1P6-01	562	0
TCGA-S3-A6ZG-01	562	0
TCGA-D8-A3Z6-01	563	0
TCGA-E2-A14Z-01	563	1
TCGA-D8-A1X5-01	565	0
TCGA-A2-A0YJ-01	566	0
TCGA-BH-A5IZ-01	567	0
TCGA-AC-A6IV-01	568	0
TCGA-B6-A0IK-01	571	1
TCGA-S3-A6ZF-01	572	0
TCGA-B6-A409-01	573	1
TCGA-BH-A8FZ-01	574	0
TCGA-S3-AA12-01	574	0
TCGA-D8-A1JE-01	575	0
TCGA-EW-A1PA-01	575	0
TCGA-EW-A1J1-01	575	0
TCGA-A2-A0T6-01	575	0
TCGA-E9-A1NH-01	576	0
TCGA-BH-A1FG-01	577	1
TCGA-A8-A07G-01	577	0
TCGA-A8-A07F-01	577	0
TCGA-D8-A1JI-01	577	0
TCGA-A8-A0A2-01	579	0
TCGA-A8-A09T-01	579	0
TCGA-AQ-A7U7-01	584	1
TCGA-A2-A1G1-01	584	0
TCGA-D8-A147-01	584	0
TCGA-A1-A0SP-01	584	0
TCGA-AC-A23C-01	585	0
TCGA-S3-AA10-01	586	0
TCGA-A2-A0YK-01	588	0
TCGA-AC-A2QI-01	588	0
TCGA-AC-A5XS-01	588	0
TCGA-D8-A1JM-01	590	0
TCGA-E2-A154-01	591	0
TCGA-C8-A9FZ-01	592	0
TCGA-LL-A7SZ-01	594	0
TCGA-A2-A1G4-01	595	0
TCGA-E2-A15P-01	595	0
TCGA-LL-A8F5-01	596	0
TCGA-E2-A1L9-01	598	0
TCGA-OL-A6VQ-01	600	0
TCGA-D8-A1XL-01	606	0
TCGA-EW-A1PH-01	607	0
TCGA-A8-A08G-01	607	0
TCGA-A8-A07E-01	608	0
TCGA-EW-A1PB-01	608	0
TCGA-D8-A1JL-01	611	0
TCGA-D8-A1JJ-01	611	0
TCGA-BH-A18J-01	612	1
TCGA-E9-A243-01	612	0
TCGA-BH-A2L8-01	612	0
TCGA-AC-A8OP-01	614	0
TCGA-A7-A13E-01	614	1
TCGA-A7-A13E-01	614	1
TCGA-A2-A1G0-01	616	0
TCGA-AR-A2LH-01	616	1
TCGA-C8-A26V-01	616	0
TCGA-AO-A0J7-01	618	0
TCGA-BH-A0HI-01	620	0
TCGA-D8-A1JN-01	620	0
TCGA-OL-A5S0-01	620	0
TCGA-AO-A1KO-01	622	0
TCGA-BH-A0AW-01	622	0
TCGA-A2-A0T4-01	624	0
TCGA-E2-A15L-01	626	0
TCGA-D8-A141-01	626	0
TCGA-A7-A26J-01	627	0
TCGA-A7-A26J-01	627	0
TCGA-S3-AA0Z-01	629	0
TCGA-E2-A15E-06	630	0
TCGA-E2-A15E-01	630	0
TCGA-A2-A0T7-01	631	0
TCGA-A1-A0SI-01	635	0
TCGA-BH-A42V-01	635	0
TCGA-D8-A13Z-01	635	0
TCGA-D8-A1JP-01	639	0
TCGA-B6-A0WX-01	639	1
TCGA-A8-A0A6-01	640	0
TCGA-E2-A155-01	640	0
TCGA-S3-A6ZH-01	641	0
TCGA-A2-A4S2-01	643	0
TCGA-D8-A146-01	643	0
TCGA-A7-A4SE-01	644	0
TCGA-LD-A66U-01	646	0
TCGA-E9-A1RG-01	647	0
TCGA-A2-A4RY-01	648	0
TCGA-AO-A0J3-01	651	0
TCGA-BH-A18H-01	652	0
TCGA-AO-A0JA-01	655	0
TCGA-E2-A15F-01	658	0
TCGA-A2-A0YH-01	659	0
TCGA-D8-A4Z1-01	659	0
TCGA-BH-A0BJ-01	660	0
TCGA-A7-A26I-01	661	0
TCGA-A7-A26I-01	661	0
TCGA-BH-A8G0-01	662	0
TCGA-D8-A1XJ-01	664	0
TCGA-A2-A4S3-01	666	0
TCGA-A2-A0YG-01	666	0
TCGA-EW-A2FW-01	672	0
TCGA-E2-A1IN-01	675	0
TCGA-AC-A3QP-01	675	0
TCGA-AC-A2B8-01	677	0
TCGA-E9-A1N6-01	678	1
TCGA-A7-A2KD-01	679	0
TCGA-OL-A5RZ-01	679	0
TCGA-AO-A0J8-01	680	0
TCGA-MS-A51U-01	681	0
TCGA-A2-A1FZ-01	683	0
TCGA-E2-A15C-01	694	0
TCGA-EW-A1OW-01	694	0
TCGA-AC-A23E-01	698	0
TCGA-BH-A0WA-01	701	0
TCGA-BH-A0H7-01	702	0
TCGA-EW-A1P5-01	703	0
TCGA-A2-A4S0-01	706	0
TCGA-AC-A3YI-01	707	0
TCGA-E2-A153-01	707	0
TCGA-AR-A0TU-01	709	0
TCGA-E2-A15A-06	710	0
TCGA-E2-A15A-01	710	0
TCGA-OL-A66I-01	714	0
TCGA-A2-A1FV-01	714	0
TCGA-BH-A5J0-01	715	0
TCGA-EW-A424-01	715	0
TCGA-A7-A13G-01	718	0
TCGA-A7-A13G-01	718	0
TCGA-A7-A26G-01	722	0
TCGA-A2-A0YT-01	723	1
TCGA-A7-A26H-01	724	0
TCGA-E9-A54Y-01	725	0
TCGA-E2-A156-01	726	0
TCGA-E9-A54X-01	727	0
TCGA-BH-A0HF-01	727	0
TCGA-D8-A1X9-01	727	0
TCGA-BH-A0W3-01	728	0
TCGA-AC-A3QQ-01	734	0
TCGA-AC-A3QQ-01	734	0
TCGA-A7-A26F-01	738	0
TCGA-A7-A26F-01	738	0
TCGA-A2-A4RX-01	742	0
TCGA-BH-A0EB-01	745	0
TCGA-E9-A24A-01	747	0
TCGA-BH-A0H6-01	747	0
TCGA-C8-A27A-01	747	0
TCGA-E2-A1LA-01	748	0
TCGA-B6-A0I8-01	749	1
TCGA-A2-A0EX-01	752	0
TCGA-OL-A5RY-01	752	0
TCGA-AC-A3YJ-01	754	0
TCGA-AQ-A04H-01	754	0
TCGA-A2-A0CM-01	754	1
TCGA-E9-A1QZ-01	755	0
TCGA-BH-A0W4-01	759	0
TCGA-LL-A440-01	759	0
TCGA-EW-A6SB-01	760	0
TCGA-A8-A07U-01	760	0
TCGA-A8-A09Q-01	761	0
TCGA-LL-A50Y-01	762	0
TCGA-AC-A3TM-01	762	0
TCGA-E2-A159-01	762	0
TCGA-A7-A13F-01	765	0
TCGA-D8-A73X-01	767	0
TCGA-A2-A0D4-01	767	0
TCGA-A2-A0YD-01	769	0
TCGA-BH-A0AY-01	777	0
TCGA-D8-A1X8-01	783	0
TCGA-BH-A1F0-01	785	1
TCGA-E9-A5UO-01	785	0
TCGA-E9-A1NG-01	786	1
TCGA-EW-A2FV-01	788	0
TCGA-EW-A1OV-01	789	0
TCGA-A8-A06Y-01	791	0
TCGA-AC-A2FM-01	792	1
TCGA-OL-A66N-01	792	0
TCGA-AO-A0J5-01	792	1
TCGA-BH-A202-01	795	0
TCGA-AO-A0JG-01	798	0
TCGA-E9-A5UP-01	803	0
TCGA-BH-A0HB-01	806	0
TCGA-BH-A18L-01	811	1
TCGA-E9-A5FK-01	812	0
TCGA-OL-A66H-01	812	0
TCGA-AQ-A04J-01	819	0
TCGA-A2-A4S1-01	820	0
TCGA-E2-A2P5-01	821	1
TCGA-A8-A0A9-01	822	0
TCGA-A2-A0SV-01	825	1
TCGA-BH-A0HX-01	829	0
TCGA-E2-A108-01	837	0
TCGA-D8-A1XA-01	839	0
TCGA-E9-A6HE-01	847	0
TCGA-LQ-A4E4-01	849	0
TCGA-A1-A0SO-01	852	0
TCGA-BH-A201-01	856	0
TCGA-OL-A6VO-01	858	0
TCGA-B6-A0X4-01	860	1
TCGA-E9-A1R0-01	860	0
TCGA-E2-A1IJ-01	865	0
TCGA-E2-A10E-01	865	0
TCGA-E2-A1B6-01	867	0
TCGA-EW-A1J6-01	875	0
TCGA-E2-A10F-01	878	0
TCGA-OL-A5RX-01	878	0
TCGA-E2-A1LE-01	879	1
TCGA-A8-A08C-01	881	0
TCGA-WT-AB44-01	883	0
TCGA-A8-A06U-01	883	1
TCGA-LL-A442-01	889	0
TCGA-AC-A4ZE-01	890	0
TCGA-A7-A13H-01	899	0
TCGA-E9-A2JS-01	904	1
TCGA-A7-A0DC-01	906	0
TCGA-A7-A0DC-01	906	0
TCGA-EW-A1P4-01	907	0
TCGA-EW-A1OY-01	908	0
TCGA-EW-A1OX-01	911	0
TCGA-BH-A0DI-01	912	0
TCGA-A8-A09K-01	912	0
TCGA-A2-A3XU-01	912	1
TCGA-EW-A1P7-01	915	0
TCGA-E9-A3QA-01	918	0
TCGA-BH-A18P-01	921	1
TCGA-BH-A0GY-01	923	0
TCGA-E9-A3X8-01	926	0
TCGA-A7-A0CJ-01	931	0
TCGA-E2-A570-01	931	0
TCGA-A8-A092-01	942	0
TCGA-A8-A08P-01	943	0
TCGA-A8-A08O-01	943	0
TCGA-BH-A0EE-01	943	0
TCGA-A8-A06X-01	943	1
TCGA-EW-A6SC-01	952	0
TCGA-A7-A26E-01	954	0
TCGA-A7-A26E-01	954	0
TCGA-BH-A1F2-01	959	1
TCGA-A7-A13D-01	965	0
TCGA-A7-A13D-01	965	0
TCGA-A2-A0YM-01	965	0
TCGA-A1-A0SK-01	967	1
TCGA-A2-A0EV-01	968	0
TCGA-E2-A14X-01	972	0
TCGA-OL-A5D8-01	973	0
TCGA-BH-A0BC-01	974	0
TCGA-E2-A14W-01	974	0
TCGA-E9-A227-01	975	0
TCGA-A8-A07L-01	975	0
TCGA-E9-A1RB-01	976	1
TCGA-E2-A1B5-01	984	0
TCGA-AC-A3BB-01	987	0
TCGA-AQ-A1H3-01	989	0
TCGA-A2-A0YC-01	990	0
TCGA-BH-A0EA-01	991	1
TCGA-B6-A0I6-01	991	1
TCGA-A2-A3XV-01	996	0
TCGA-LL-A441-01	996	0
TCGA-AO-A0J2-01	997	0
TCGA-E9-A1N4-01	1000	0
TCGA-E9-A3Q9-01	1001	0
TCGA-BH-A18F-01	1001	0
TCGA-AQ-A54O-01	1001	0
TCGA-A8-A08F-01	1004	0
TCGA-A8-A091-01	1004	0
TCGA-E2-A1B4-01	1004	1
TCGA-A8-A08S-01	1004	0
TCGA-AC-A2QH-01	1005	0
TCGA-AC-A2QH-01	1005	0
TCGA-A8-A09M-01	1006	0
TCGA-A7-A0DB-01	1007	0
TCGA-A7-A0DB-01	1007	0
TCGA-E2-A14S-01	1009	0
TCGA-BH-A1FD-01	1009	1
TCGA-EW-A6SD-01	1010	0
TCGA-AR-A5QN-01	1013	0
TCGA-D8-A3Z5-01	1015	0
TCGA-E2-A1II-01	1025	0
TCGA-AR-A1AY-01	1026	0
TCGA-E2-A1IH-01	1026	0
TCGA-A2-A0D2-01	1027	0
TCGA-A2-A3XS-01	1032	1
TCGA-A8-A07C-01	1034	0
TCGA-C8-A3M7-01	1034	1
TCGA-BH-A1FH-01	1034	1
TCGA-EW-A3E8-01	1035	0
TCGA-E9-A1N8-01	1039	0
TCGA-E2-A14V-01	1042	0
TCGA-A2-A0EU-01	1043	0
TCGA-E2-A576-01	1043	0
TCGA-A7-A0CG-01	1043	0
TCGA-E2-A107-01	1047	0
TCGA-E9-A226-01	1048	1
TCGA-E2-A2P6-01	1051	0
TCGA-EW-A1PG-01	1051	0
TCGA-A2-A0D1-01	1051	0
TCGA-E9-A1N3-01	1059	0
TCGA-OL-A5RV-01	1062	0
TCGA-E2-A573-01	1062	0
TCGA-E9-A1R2-01	1063	0
TCGA-A2-A0ET-01	1066	0
TCGA-E9-A1NF-01	1072	1
TCGA-A7-A0CE-01	1074	0
TCGA-A7-A0CH-01	1079	0
TCGA-A7-A0DA-01	1085	0
TCGA-E9-A1NE-01	1088	0
TCGA-A2-A3XY-01	1093	1
TCGA-BH-A18I-01	1093	0
TCGA-A2-A04Y-01	1099	0
TCGA-E9-A1N9-01	1101	0
TCGA-A2-A3KC-01	1102	0
TCGA-OL-A5D6-01	1104	1
TCGA-OL-A5RW-01	1106	0
TCGA-E9-A1NA-01	1112	0
TCGA-BH-A28Q-01	1119	0
TCGA-E9-A1N5-01	1120	0
TCGA-BH-A28O-01	1120	0
TCGA-BH-A0HQ-01	1121	0
TCGA-A8-A085-01	1124	0
TCGA-A8-A08J-01	1127	1
TCGA-BH-A0BA-01	1132	0
TCGA-E2-A1BD-01	1133	0
TCGA-E2-A1IF-01	1138	0
TCGA-A7-A0D9-01	1139	0
TCGA-AO-A0J6-01	1140	0
TCGA-E2-A10B-01	1141	0
TCGA-BH-A18R-01	1142	1
TCGA-E9-A229-01	1148	0
TCGA-BH-A0B1-01	1148	0
TCGA-AR-A1AS-01	1150	0
TCGA-B6-A3ZX-01	1152	1
TCGA-BH-A0DH-01	1156	0
TCGA-A8-A08B-01	1156	0
TCGA-A8-A0AD-01	1157	0
TCGA-E9-A3HO-01	1158	0
TCGA-AR-A2LN-01	1161	0
TCGA-GM-A3NY-01	1162	0
TCGA-E2-A14Q-01	1163	0
TCGA-A7-A0CD-01	1165	0
TCGA-E9-A22B-01	1167	0
TCGA-E2-A14R-01	1174	0
TCGA-BH-A203-01	1174	1
TCGA-E2-A574-01	1179	0
TCGA-AR-A5QP-01	1185	0
TCGA-E9-A247-01	1186	0
TCGA-E9-A22A-01	1189	0
TCGA-BH-A0B4-01	1191	0
TCGA-A1-A0SN-01	1196	0
TCGA-AR-A2LO-01	1198	0
TCGA-BH-A0B3-01	1203	0
TCGA-E9-A1NC-01	1203	0
TCGA-A2-A3KD-01	1206	0
TCGA-E2-A572-01	1208	0
TCGA-EW-A1IX-01	1208	0
TCGA-EW-A1P1-01	1210	0
TCGA-A8-A08Z-01	1217	0
TCGA-OL-A5RU-01	1219	0
TCGA-OL-A6VR-01	1220	0
TCGA-E2-A10C-01	1220	0
TCGA-E9-A1RC-01	1224	0
TCGA-E2-A10A-01	1229	0
TCGA-EW-A1OZ-01	1229	0
TCGA-E9-A22H-01	1232	0
TCGA-AR-A2LQ-01	1233	0
TCGA-AC-A2FB-01	1234	0
TCGA-AO-A12H-01	1234	0
TCGA-E9-A22G-01	1239	0
TCGA-E2-A14P-01	1246	0
TCGA-BH-A0H9-01	1247	0
TCGA-E9-A22D-01	1248	0
TCGA-EW-A1P0-01	1251	0
TCGA-E9-A1ND-01	1266	0
TCGA-E9-A22E-01	1269	0
TCGA-BH-A0C0-01	1270	0
TCGA-AR-A1AT-01	1272	1
TCGA-OL-A66K-01	1275	1
TCGA-A8-A095-01	1277	0
TCGA-E9-A228-01	1285	0
TCGA-BH-A1EU-01	1286	1
TCGA-BH-A0W5-01	1288	0
TCGA-A2-A25B-01	1291	0
TCGA-OL-A66L-01	1301	0
TCGA-A8-A07B-01	1308	0
TCGA-A8-A08X-01	1308	0
TCGA-E2-A105-01	1308	0
TCGA-D8-A1XW-01	1309	0
TCGA-E2-A1LL-01	1309	0
TCGA-E2-A14U-01	1318	0
TCGA-A1-A0SE-01	1321	0
TCGA-BH-A0BF-01	1324	1
TCGA-E2-A3DX-01	1325	0
TCGA-B6-A1KC-01	1326	0
TCGA-B6-A1KC-01	1326	0
TCGA-GM-A3XG-01	1330	0
TCGA-A2-A0SY-01	1347	0
TCGA-AO-A03V-01	1351	0
TCGA-E2-A14O-01	1359	0
TCGA-BH-A0E7-01	1363	0
TCGA-BH-A0W7-01	1363	0
TCGA-A2-A0SW-01	1365	1
TCGA-E9-A1RA-01	1369	0
TCGA-A8-A09I-01	1371	0
TCGA-A8-A07Z-01	1371	0
TCGA-BH-A1FM-01	1388	1
TCGA-BH-A0C1-01	1411	1
TCGA-BH-A0C1-01	1411	1
TCGA-E9-A1RH-01	1417	0
TCGA-E2-A109-01	1417	0
TCGA-E9-A1RE-01	1419	0
TCGA-PE-A5DC-01	1430	1
TCGA-E2-A14N-01	1434	0
TCGA-A1-A0SH-01	1437	0
TCGA-A2-A3XX-01	1439	1
TCGA-3C-AALK-01	1448	0
TCGA-E9-A1RI-01	1449	0
TCGA-D8-A27K-01	1461	0
TCGA-A1-A0SF-01	1463	0
TCGA-E9-A1R7-01	1467	0
TCGA-A2-A0CO-01	1468	1
TCGA-5L-AAT1-01	1471	0
TCGA-3C-AALJ-01	1474	0
TCGA-A2-A0YL-01	1474	0
TCGA-C8-A12Y-01	1476	0
TCGA-5L-AAT0-01	1477	0
TCGA-A8-A09E-01	1492	0
TCGA-A2-A0YI-01	1505	0
TCGA-BH-A1EX-01	1508	1
TCGA-A2-A0T3-01	1516	0
TCGA-BH-A0BV-01	1519	0
TCGA-A8-A09D-01	1522	0
TCGA-E2-A1LG-01	1523	0
TCGA-AO-A0JI-01	1528	0
TCGA-A2-A3XZ-01	1532	0
TCGA-A2-A0SX-01	1534	0
TCGA-A2-A0YF-01	1535	0
TCGA-AO-A0JB-01	1542	0
TCGA-BH-A0HY-01	1545	0
TCGA-A2-A3Y0-01	1546	0
TCGA-AO-A0JC-01	1547	0
TCGA-AR-A24K-01	1548	0
TCGA-AR-A24W-01	1550	0
TCGA-BH-A18V-01	1556	1
TCGA-BH-A18V-06	1556	1
TCGA-BH-A0HW-01	1561	0
TCGA-BH-A18U-01	1563	1
TCGA-E2-A15T-01	1563	0
TCGA-BH-A0B8-01	1569	0
TCGA-BH-A0B9-01	1572	0
TCGA-AO-A0J4-01	1587	0
TCGA-A2-A259-01	1596	0
TCGA-E2-A1LS-01	1604	0
TCGA-EW-A2FS-01	1604	0
TCGA-EW-A1P3-01	1611	0
TCGA-BH-A0HA-01	1611	0
TCGA-WT-AB41-01	1611	0
TCGA-D8-A1JG-01	1612	0
TCGA-AO-A0J9-01	1613	0
TCGA-A8-A06T-01	1614	0
TCGA-A2-A0CZ-01	1616	0
TCGA-BH-A0H5-01	1620	0
TCGA-E2-A1B0-01	1631	0
TCGA-AO-A12G-01	1639	0
TCGA-E2-A15J-01	1640	0
TCGA-A8-A076-01	1642	0
TCGA-BH-A1FR-01	1642	1
TCGA-BH-A0DO-01	1644	0
TCGA-E2-A1L6-01	1648	0
TCGA-AR-A2LK-01	1649	1
TCGA-A2-A0SU-01	1662	0
TCGA-EW-A2FR-01	1673	0
TCGA-BH-A1FL-01	1673	1
TCGA-A2-A0CY-01	1673	0
TCGA-D8-A1XO-01	1682	0
TCGA-AO-A0JL-01	1683	0
TCGA-A2-A04X-01	1686	0
TCGA-D8-A1JB-01	1688	0
TCGA-BH-A1FU-01	1688	1
TCGA-E2-A15I-01	1692	0
TCGA-BH-A18Q-01	1692	1
TCGA-BH-A1EW-01	1694	1
TCGA-AR-A0TY-01	1699	1
TCGA-A2-A3XW-01	1712	0
TCGA-D8-A13Y-01	1728	0
TCGA-A2-A0CX-01	1728	0
TCGA-E2-A15R-01	1732	0
TCGA-AR-A2LR-01	1742	0
TCGA-BH-A208-01	1759	1
TCGA-OL-A5D7-01	1780	0
TCGA-B6-A0X7-01	1781	1
TCGA-OL-A5DA-01	1783	0
TCGA-AO-A03U-01	1793	1
TCGA-E2-A1IK-01	1800	0
TCGA-GM-A2D9-01	1812	1
TCGA-BH-A0AV-01	1820	0
TCGA-E2-A1L7-01	1836	0
TCGA-AO-A12F-01	1842	0
TCGA-A2-A1FX-01	1847	0
TCGA-AC-A2FG-01	1853	0
TCGA-E2-A1IO-01	1855	0
TCGA-AR-A1AV-01	1864	0
TCGA-AO-A03M-01	1866	0
TCGA-BH-A0BG-01	1871	0
TCGA-A2-A0D3-01	1873	0
TCGA-BH-A0BM-01	1876	0
TCGA-AO-A1KQ-01	1882	0
TCGA-A2-A0EW-01	1884	1
TCGA-AO-A0JJ-01	1887	0
TCGA-HN-A2OB-01	1900	1
TCGA-BH-A0AU-01	1914	0
TCGA-BH-A0AZ-01	1919	0
TCGA-A2-A04V-01	1920	1
TCGA-A2-A0EY-01	1925	0
TCGA-BH-A0EI-01	1926	0
TCGA-BH-A1FJ-01	1927	1
TCGA-BH-A0H3-01	1928	0
TCGA-AR-A2LM-01	1935	0
TCGA-E2-A150-01	1935	0
TCGA-PE-A5DD-01	1953	0
TCGA-AR-A0TX-01	1972	0
TCGA-AO-A0JF-01	1980	0
TCGA-AR-A0U0-01	1988	0
TCGA-B6-A0IE-01	1993	1
TCGA-OL-A66J-01	1996	0
TCGA-BH-A18S-01	2009	1
TCGA-AR-A2LL-01	2012	0
TCGA-GM-A3XN-01	2019	0
TCGA-AO-A03N-01	2031	0
TCGA-V7-A7HQ-01	2033	0
TCGA-BH-A0DG-01	2041	0
TCGA-A2-A0D0-01	2048	0
TCGA-BH-A0DV-01	2064	0
TCGA-B6-A408-01	2072	0
TCGA-B6-A0RG-01	2082	0
TCGA-AO-A03R-01	2091	0
TCGA-B6-A0X5-01	2097	1
TCGA-GM-A3XL-01	2108	0
TCGA-E2-A14Y-01	2109	0
TCGA-AO-A03T-01	2124	0
TCGA-BH-A1EN-01	2127	1
TCGA-E2-A152-01	2128	0
TCGA-BH-A0B5-01	2136	0
TCGA-E2-A1IG-01	2140	0
TCGA-AO-A12E-01	2142	0
TCGA-GM-A2DF-01	2155	0
TCGA-BH-A0DX-01	2156	0
TCGA-AR-A255-01	2161	0
TCGA-B6-A40C-01	2164	0
TCGA-AO-A0JM-01	2184	0
TCGA-A2-A0ES-01	2190	0
TCGA-AO-A0JD-01	2190	0
TCGA-GM-A4E0-01	2191	0
TCGA-BH-A1FN-01	2192	1
TCGA-GM-A2DH-01	2193	0
TCGA-BH-A0BO-01	2197	0
TCGA-BH-A18M-01	2207	1
TCGA-AC-A2BK-01	2222	0
TCGA-AR-A5QM-01	2231	0
TCGA-B6-A1KI-01	2236	0
TCGA-E2-A1L8-01	2240	0
TCGA-A2-A04T-01	2246	0
TCGA-AC-A23G-01	2248	0
TCGA-BH-A0BQ-01	2255	0
TCGA-BH-A0BZ-01	2255	0
TCGA-AC-A2FO-01	2255	0
TCGA-A2-A0ER-01	2263	0
TCGA-BH-A1FE-06	2273	1
TCGA-BH-A1FE-01	2273	1
TCGA-BH-A0BL-01	2278	0
TCGA-B6-A402-01	2281	0
TCGA-GM-A2DD-01	2282	0
TCGA-AR-A0TV-01	2288	0
TCGA-A2-A0CT-01	2289	0
TCGA-BH-A0BP-01	2296	1
TCGA-E2-A1LB-01	2306	0
TCGA-E2-A14T-01	2311	0
TCGA-E2-A1AZ-01	2329	0
TCGA-BH-A0BR-01	2330	0
TCGA-AO-A0JE-01	2335	0
TCGA-A2-A0CS-01	2348	1
TCGA-B6-A0I1-01	2361	1
TCGA-E2-A1IE-01	2362	0
TCGA-BH-A0BT-01	2365	0
TCGA-BH-A0BW-01	2371	0
TCGA-AO-A12C-01	2372	0
TCGA-BH-A0DE-01	2372	0
TCGA-B6-A0RM-01	2373	1
TCGA-BH-A0DL-01	2381	0
TCGA-AR-A1AJ-01	2383	0
TCGA-A2-A04Q-01	2385	0
TCGA-BH-A0DT-01	2403	0
TCGA-GM-A2DB-01	2406	0
TCGA-B6-A0WV-01	2417	1
TCGA-A2-A0EQ-01	2426	0
TCGA-A2-A0EO-01	2442	0
TCGA-AO-A03L-01	2442	0
TCGA-B6-A0RL-01	2469	1
TCGA-BH-A0B0-01	2477	0
TCGA-AO-A03O-01	2483	1
TCGA-BH-A0B6-01	2483	0
TCGA-BH-A0DD-01	2486	0
TCGA-BH-A0E9-01	2489	0
TCGA-AO-A1KR-01	2513	0
TCGA-AO-A12D-01	2515	0
TCGA-BH-A1ET-01	2520	1
TCGA-BH-A204-01	2534	1
TCGA-GM-A2DC-01	2535	0
TCGA-E2-A106-01	2541	0
TCGA-AR-A0U2-01	2551	1
TCGA-AR-A0TS-01	2558	0
TCGA-BH-A0B7-01	2559	0
TCGA-B6-A0IN-01	2573	1
TCGA-GM-A2DI-01	2590	0
TCGA-GM-A2DO-01	2596	0
TCGA-B6-A401-01	2596	0
TCGA-AR-A254-01	2605	0
TCGA-BH-A0BS-01	2612	0
TCGA-AR-A1AO-01	2618	0
TCGA-AR-A1AX-01	2629	0
TCGA-AR-A1AW-01	2632	0
TCGA-AR-A2LJ-01	2632	0
TCGA-AC-A2FE-01	2636	1
TCGA-PE-A5DE-01	2645	0
TCGA-GM-A2DK-01	2645	0
TCGA-AC-A2FK-01	2650	0
TCGA-E2-A1B1-01	2653	0
TCGA-A2-A04U-01	2654	0
TCGA-A2-A0CQ-01	2695	0
TCGA-AR-A250-01	2707	0
TCGA-BH-A0C3-01	2709	0
TCGA-BH-A1F5-01	2712	1
TCGA-B6-A0RT-01	2721	0
TCGA-AC-A2FF-01	2759	0
TCGA-BH-A18K-01	2763	1
TCGA-BH-A0C7-01	2767	0
TCGA-BH-A0C7-01	2767	0
TCGA-A2-A3XT-01	2770	0
TCGA-BH-A1EO-01	2798	1
TCGA-A2-A0CP-01	2813	0
TCGA-AR-A252-01	2838	0
TCGA-AR-A256-01	2854	1
TCGA-AR-A1AP-01	2856	0
TCGA-AR-A24L-01	2866	1
TCGA-AR-A1AU-01	2868	0
TCGA-AO-A03P-01	2911	1
TCGA-AR-A1AN-01	2920	0
TCGA-AO-A1KP-01	2953	0
TCGA-B6-A0IH-01	2965	1
TCGA-BH-A1F6-01	2965	1
TCGA-B6-A0WS-01	2965	1
TCGA-AR-A1AL-01	2971	0
TCGA-AR-A24S-01	2976	0
TCGA-AO-A12B-01	2989	0
TCGA-AR-A0TQ-01	2991	0
TCGA-AR-A1AM-01	2991	0
TCGA-AR-A24Z-01	3001	0
TCGA-AR-A24X-01	3004	0
TCGA-AR-A0TW-01	3009	0
TCGA-A2-A0CV-01	3011	0
TCGA-A2-A0CL-01	3015	0
TCGA-A2-A0ST-01	3017	0
TCGA-AR-A1AQ-01	3021	0
TCGA-AC-A2BM-01	3022	0
TCGA-AR-A251-01	3030	0
TCGA-AR-A24N-01	3035	0
TCGA-B6-A0RS-01	3063	1
TCGA-B6-A1KF-01	3088	0
TCGA-GM-A2DN-01	3091	0
TCGA-A2-A0EM-01	3094	0
TCGA-A2-A04W-01	3102	0
TCGA-AO-A12A-01	3112	0
TCGA-E2-A1LI-01	3121	0
TCGA-B6-A0RP-01	3126	1
TCGA-AR-A24U-01	3128	0
TCGA-B6-A40B-01	3152	0
TCGA-AR-A1AK-01	3159	0
TCGA-AR-A24Q-01	3172	0
TCGA-AR-A24T-01	3202	0
TCGA-AR-A24V-01	3203	0
TCGA-A2-A25E-01	3204	0
TCGA-GM-A2DM-01	3226	0
TCGA-E2-A1LH-01	3247	0
TCGA-AO-A128-01	3248	0
TCGA-Z7-A8R6-01	3256	0
TCGA-AR-A0U4-01	3261	0
TCGA-AR-A0TZ-01	3262	1
TCGA-A2-A25A-01	3276	0
TCGA-A2-A0CW-01	3283	0
TCGA-A2-A0CR-01	3283	0
TCGA-AO-A129-01	3286	0
TCGA-Z7-A8R5-01	3287	0
TCGA-AR-A1AI-01	3296	0
TCGA-AO-A126-01	3307	0
TCGA-AR-A0TT-01	3316	0
TCGA-GI-A2C9-01	3342	0
TCGA-GM-A3NW-01	3361	0
TCGA-BH-A42U-01	3364	0
TCGA-A8-A08T-01	3409	1
TCGA-AR-A24R-01	3430	0
TCGA-AO-A125-01	3456	0
TCGA-B6-A0WY-01	3461	1
TCGA-BH-A1ES-01	3462	1
TCGA-BH-A1ES-06	3462	1
TCGA-BH-A1FC-01	3472	1
TCGA-AO-A124-01	3506	0
TCGA-GM-A2DL-01	3519	0
TCGA-A2-A0EP-01	3603	0
TCGA-AR-A24O-01	3607	0
TCGA-AR-A24M-01	3660	0
TCGA-BH-A1FB-01	3669	1
TCGA-A2-A04R-01	3709	0
TCGA-AR-A1AH-01	3807	0
TCGA-B6-A0IM-01	3873	1
TCGA-B6-A0IP-01	3926	1
TCGA-B6-A0IB-01	3941	1
TCGA-B6-A0X0-01	3945	1
TCGA-AQ-A04L-01	3957	0
TCGA-AQ-A04L-01	3957	0
TCGA-BH-A209-01	3959	1
TCGA-3C-AALI-01	4005	0
TCGA-3C-AAAU-01	4047	0
TCGA-AR-A0U1-01	4052	0
TCGA-AR-A0U3-01	4080	0
TCGA-A2-A0EN-01	4088	0
TCGA-A2-A0CK-01	4159	0
TCGA-B6-A1KN-01	4233	0
TCGA-B6-A0RQ-01	4267	1
TCGA-AR-A0TP-01	4275	0
TCGA-B6-A0IQ-01	4285	0
TCGA-A2-A04N-01	4354	0
TCGA-B6-A0I2-01	4361	0
TCGA-B6-A0IG-01	4456	1
TCGA-AR-A24H-01	4894	0
TCGA-B6-A0RO-01	4929	0
TCGA-B6-A0IO-01	5042	0
TCGA-AR-A2LE-01	5062	0
TCGA-B6-A0RV-01	5156	0
TCGA-B6-A2IU-01	5176	0
TCGA-B6-A0WT-01	5739	0
TCGA-B6-A0WZ-01	6292	0
TCGA-B6-A0RH-01	6456	1
TCGA-GM-A2DA-01	6593	1
TCGA-B6-A0IJ-01	7106	0
TCGA-B6-A0RI-01	7126	0
TCGA-B6-A0X1-01	7455	1
TCGA-B6-A0RE-01	7777	0
TCGA-B6-A0RN-01	8008	0
TCGA-B6-A0IA-01	8391	0
TCGA-B6-A0I5-01	8556	0
TCGA-B6-A0RU-01	8605	0

## Sheet: TCGA_CESC_OS
svdata	time	event
TCGA-EK-A2RO-01	2	0
TCGA-EK-A3GJ-01	3	0
TCGA-EK-A2R9-01	4	0
TCGA-ZJ-AAXU-01	5	0
TCGA-LP-A5U2-01	9	0
TCGA-EK-A2RB-01	9	0
TCGA-EA-A97N-01	11	0
TCGA-EK-A2PK-01	12	0
TCGA-EK-A2PL-01	13	0
TCGA-EK-A2RK-01	13	0
TCGA-C5-A1MJ-01	14	1
TCGA-EK-A3GK-01	15	0
TCGA-EK-A2PM-01	18	0
TCGA-ZJ-AAX4-01	21	0
TCGA-LP-A5U3-01	25	0
TCGA-EK-A2R7-01	27	0
TCGA-LP-A4AW-01	27	0
TCGA-EK-A3GN-01	27	0
TCGA-FU-A770-01	34	0
TCGA-DG-A2KH-01	34	0
TCGA-ZJ-AAXA-01	43	0
TCGA-EK-A2R8-01	44	0
TCGA-FU-A3TX-01	45	0
TCGA-EK-A2PG-01	46	0
TCGA-EK-A2RM-01	50	0
TCGA-VS-A9UJ-01	52	1
TCGA-EK-A2RJ-01	53	0
TCGA-EK-A2RE-01	57	0
TCGA-EK-A2RN-01	71	0
TCGA-C5-A1MK-01	74	1
TCGA-C5-A7X8-01	83	0
TCGA-PN-A8MA-01	90	0
TCGA-JW-A5VH-01	100	1
TCGA-VS-A9UV-01	104	1
TCGA-C5-A1MP-01	109	0
TCGA-ZX-AA5X-01	119	0
TCGA-EK-A2RC-01	129	0
TCGA-VS-A9V4-01	132	1
TCGA-VS-A94Y-01	144	1
TCGA-C5-A902-01	149	0
TCGA-VS-A9V1-01	157	1
TCGA-C5-A1BN-01	166	1
TCGA-EK-A2IP-01	202	0
TCGA-EA-A50E-01	227	1
TCGA-EX-A1H6-01	241	0
TCGA-DS-A7WI-01	252	1
TCGA-JW-A852-01	252	1
TCGA-EX-A69M-01	253	1
TCGA-C5-A8XI-01	254	0
TCGA-MA-AA42-01	259	0
TCGA-DS-A1O9-01	266	1
TCGA-Q1-A6DT-01	275	1
TCGA-MA-AA41-01	279	0
TCGA-Q1-A73Q-01	284	0
TCGA-C5-A7X3-01	284	1
TCGA-HM-A6W2-06	287	0
TCGA-HM-A6W2-01	287	0
TCGA-VS-A8EB-01	305	1
TCGA-FU-A5XV-01	321	0
TCGA-LP-A4AU-01	343	0
TCGA-MA-AA43-01	346	0
TCGA-C5-A0TN-01	348	1
TCGA-VS-A8QC-01	350	1
TCGA-UC-A7PD-01	355	1
TCGA-EA-A44S-01	369	0
TCGA-UC-A7PG-06	370	1
TCGA-UC-A7PG-01	370	1
TCGA-FU-A23K-01	372	0
TCGA-DS-A1OC-01	376	0
TCGA-LP-A4AX-01	380	0
TCGA-EK-A2GZ-01	383	0
TCGA-EA-A3QD-01	397	0
TCGA-LP-A7HU-01	406	0
TCGA-EA-A78R-01	410	0
TCGA-C5-A7X5-01	414	1
TCGA-FU-A40J-01	426	0
TCGA-Q1-A73O-01	428	0
TCGA-VS-A9UL-01	442	1
TCGA-VS-A9UU-01	442	0
TCGA-RA-A741-01	444	0
TCGA-EX-A449-01	447	0
TCGA-C5-A907-01	448	0
TCGA-EA-A556-01	453	0
TCGA-HM-A4S6-01	454	0
TCGA-EX-A3L1-01	463	0
TCGA-VS-AA62-01	469	1
TCGA-C5-A7CL-01	471	1
TCGA-EX-A8YF-01	473	0
TCGA-Q1-A5R1-01	474	0
TCGA-JW-A5VL-01	474	0
TCGA-VS-A953-01	477	1
TCGA-VS-A9UT-01	482	0
TCGA-Q1-A73P-01	483	0
TCGA-Q1-A5R3-01	485	0
TCGA-FU-A3EO-01	490	0
TCGA-Q1-A6DV-01	491	0
TCGA-FU-A3WB-01	491	0
TCGA-DS-A7WF-01	492	1
TCGA-VS-A9V5-01	494	1
TCGA-Q1-A5R2-01	499	0
TCGA-VS-A94X-01	506	1
TCGA-DS-A5RQ-01	512	0
TCGA-C5-A901-01	518	0
TCGA-C5-A7UC-01	523	1
TCGA-MY-A913-01	524	0
TCGA-DS-A7WH-01	533	0
TCGA-2W-A8YY-01	533	0
TCGA-Q1-A6DW-01	534	0
TCGA-VS-A9V3-01	540	0
TCGA-GH-A9DA-01	540	0
TCGA-MA-AA3Y-01	542	0
TCGA-4J-AA1J-01	542	0
TCGA-C5-A3HF-01	543	1
TCGA-C5-A3HE-01	548	0
TCGA-JW-AAVH-01	552	0
TCGA-VS-A9UY-01	555	1
TCGA-VS-A9V2-01	555	0
TCGA-Q1-A73R-01	567	0
TCGA-C5-A1BF-01	570	1
TCGA-VS-A9V0-01	573	0
TCGA-FU-A2QG-01	579	0
TCGA-ZJ-A8QR-01	582	1
TCGA-EK-A2PI-01	586	0
TCGA-MA-AA3Z-01	595	0
TCGA-R2-A69V-01	596	0
TCGA-EX-A69L-01	602	0
TCGA-C5-A1BQ-01	604	1
TCGA-MU-A8JM-01	607	0
TCGA-VS-A8EJ-01	607	1
TCGA-MA-AA3X-01	617	0
TCGA-C5-A7CM-01	619	0
TCGA-EX-A1H5-01	619	0
TCGA-C5-A3HL-01	621	0
TCGA-JW-A5VK-01	623	0
TCGA-HM-A3JK-01	632	0
TCGA-C5-A8YT-01	633	1
TCGA-MY-A5BF-01	634	0
TCGA-JX-A5QV-01	636	0
TCGA-C5-A1ML-01	636	1
TCGA-C5-A8ZZ-01	636	0
TCGA-FU-A3NI-01	638	1
TCGA-JX-A3PZ-01	642	1
TCGA-JW-A5VJ-01	652	0
TCGA-HM-A3JJ-01	659	1
TCGA-MA-AA3W-01	685	0
TCGA-Q1-A73S-01	688	0
TCGA-DS-A3LQ-01	699	0
TCGA-C5-A8YQ-01	715	1
TCGA-BI-A20A-01	720	0
TCGA-FU-A23L-01	725	0
TCGA-VS-A8EI-01	729	0
TCGA-EA-A6QX-01	730	0
TCGA-VS-A9UD-01	739	0
TCGA-JW-A5VI-01	747	0
TCGA-EA-A411-01	747	0
TCGA-EA-A4BA-01	755	0
TCGA-EA-A3QE-01	761	0
TCGA-HG-A2PA-01	773	1
TCGA-EA-A5O9-01	788	0
TCGA-EA-A43B-01	791	0
TCGA-WL-A834-01	791	0
TCGA-VS-A9UR-01	793	0
TCGA-FU-A3TQ-01	795	0
TCGA-EK-A2H1-01	799	0
TCGA-EA-A410-01	803	0
TCGA-EA-A5FO-01	815	0
TCGA-VS-A9UC-01	825	0
TCGA-EA-A5ZF-01	828	0
TCGA-VS-A9UM-01	829	1
TCGA-EA-A5ZE-01	829	0
TCGA-VS-A8EK-01	829	1
TCGA-EA-A5ZD-01	830	0
TCGA-JW-A5VG-01	834	0
TCGA-C5-A8YR-01	837	1
TCGA-MU-A51Y-01	854	0
TCGA-DS-A1OB-01	861	1
TCGA-FU-A3YQ-01	861	0
TCGA-JW-A69B-01	863	0
TCGA-DS-A1OA-01	879	1
TCGA-XS-A8TJ-01	890	0
TCGA-IR-A3LK-01	908	1
TCGA-VS-A9UB-01	911	0
TCGA-C5-A1M8-01	919	0
TCGA-EA-A3HR-01	940	0
TCGA-VS-A8QM-01	951	1
TCGA-FU-A3HY-01	954	0
TCGA-EA-A3HT-01	954	0
TCGA-C5-A1M6-01	955	1
TCGA-EA-A3HS-01	959	0
TCGA-EA-A439-01	965	0
TCGA-VS-A8Q8-01	978	1
TCGA-VS-A8EH-01	986	0
TCGA-C5-A2M2-01	1011	1
TCGA-EA-A3HU-01	1013	0
TCGA-VS-A94Z-01	1015	0
TCGA-C5-A1MQ-01	1031	0
TCGA-MU-A5YI-01	1053	0
TCGA-C5-A1M9-01	1065	1
TCGA-MY-A5BE-01	1066	0
TCGA-FU-A57G-01	1078	0
TCGA-C5-A1MI-01	1083	1
TCGA-VS-A8QA-01	1099	0
TCGA-FU-A3HZ-01	1103	0
TCGA-IR-A3LL-01	1106	0
TCGA-C5-A1BI-01	1112	0
TCGA-DS-A0VK-01	1118	1
TCGA-EA-A3Y4-01	1122	0
TCGA-EA-A3HQ-01	1136	0
TCGA-C5-A2M1-01	1169	0
TCGA-C5-A1MH-01	1186	1
TCGA-EA-A1QS-01	1203	0
TCGA-VS-A8QH-01	1210	1
TCGA-VS-A950-01	1221	0
TCGA-EA-A1QT-01	1243	0
TCGA-VS-A94W-01	1243	0
TCGA-C5-A1MN-01	1245	1
TCGA-EK-A2RA-01	1246	0
TCGA-VS-A9UQ-01	1263	0
TCGA-VS-A9U6-01	1320	0
TCGA-C5-A2LS-01	1345	0
TCGA-JX-A3Q8-01	1357	0
TCGA-DG-A2KL-01	1367	0
TCGA-VS-A9UI-01	1372	1
TCGA-VS-A8EG-01	1386	0
TCGA-C5-A8XH-01	1394	1
TCGA-C5-A1M7-01	1409	0
TCGA-VS-A8EC-01	1415	0
TCGA-VS-A9UH-01	1427	0
TCGA-VS-A9UP-01	1444	0
TCGA-EK-A2RL-01	1453	1
TCGA-VS-A9UO-01	1456	0
TCGA-VS-A9U7-01	1472	0
TCGA-BI-A0VR-01	1505	0
TCGA-VS-A958-01	1525	0
TCGA-VS-A9U5-01	1535	0
TCGA-C5-A7XC-01	1551	0
TCGA-VS-A959-01	1561	0
TCGA-C5-A3HD-01	1582	0
TCGA-C5-A1MF-01	1617	0
TCGA-VS-A8Q9-01	1630	0
TCGA-MY-A5BD-01	1667	0
TCGA-VS-A957-01	1688	0
TCGA-DS-A0VL-01	1692	1
TCGA-VS-A954-01	1714	0
TCGA-BI-A0VS-01	1735	0
TCGA-C5-A1ME-01	1756	0
TCGA-VS-A952-01	1778	0
TCGA-DR-A0ZM-01	1791	0
TCGA-VS-A8QF-01	1800	0
TCGA-EK-A2H0-01	1847	0
TCGA-DG-A2KM-01	1946	0
TCGA-VS-A8EL-01	1992	0
TCGA-IR-A3LB-01	2032	1
TCGA-VS-A9UZ-01	2044	0
TCGA-C5-A1M5-01	2052	1
TCGA-ZJ-A8QQ-01	2056	0
TCGA-C5-A1BE-01	2094	1
TCGA-UC-A7PI-01	2114	0
TCGA-C5-A2LT-01	2226	0
TCGA-C5-A2LV-01	2234	0
TCGA-C5-A2LY-01	2383	0
TCGA-IR-A3LH-01	2394	0
TCGA-IR-A3LI-01	2493	0
TCGA-DG-A2KK-01	2496	0
TCGA-C5-A1BM-01	2520	1
TCGA-C5-A2LX-01	2526	0
TCGA-DR-A0ZL-01	2669	0
TCGA-UC-A7PF-01	2859	1
TCGA-C5-A7UI-01	2888	1
TCGA-DG-A2KJ-01	2893	0
TCGA-IR-A3LF-01	2949	0
TCGA-C5-A8XK-01	3039	0
TCGA-C5-A2LZ-01	3046	1
TCGA-C5-A7CJ-01	3097	1
TCGA-EK-A2IR-01	3442	0
TCGA-DS-A0VM-01	3589	0
TCGA-DS-A0VN-01	3609	0
TCGA-DS-A1OD-01	3874	0
TCGA-IR-A3LC-01	3935	0
TCGA-C5-A7UH-01	3988	0
TCGA-C5-A7CK-01	4086	1
TCGA-IR-A3LA-01	4172	0
TCGA-C5-A1BJ-01	4385	0
TCGA-C5-A8XJ-01	4467	0
TCGA-C5-A7CO-01	4482	0
TCGA-IR-A3L7-01	4483	0
TCGA-C5-A7CH-01	4694	0
TCGA-C5-A7UE-01	4738	0
TCGA-C5-A905-01	4879	0
TCGA-C5-A1BL-01	5271	0
TCGA-C5-A1BK-01	5385	0
TCGA-JX-A3Q0-01	6375	0
TCGA-C5-A7CG-01	6408	0

## Sheet: TCGA_CHOL_OS
svdata	time	event
TCGA-W5-AA31-01	10	0
TCGA-WD-A7RX-01	21	1
TCGA-YR-A95A-01	26	1
TCGA-W5-AA2Q-01	50	0
TCGA-ZU-A8S4-01	98	1
TCGA-ZD-A8I3-01	169	1
TCGA-W5-AA39-01	170	1
TCGA-W5-AA2X-01	271	1
TCGA-3X-AAV9-01	339	1
TCGA-ZH-A8Y1-01	385	1
TCGA-3X-AAVB-01	402	0
TCGA-4G-AAZT-01	420	0
TCGA-3X-AAVA-01	445	1
TCGA-ZH-A8Y6-01	519	0
TCGA-W5-AA34-01	555	1
TCGA-ZH-A8Y8-01	602	0
TCGA-W5-AA2U-01	627	1
TCGA-W5-AA2O-01	640	1
TCGA-3X-AAVE-01	650	0
TCGA-ZH-A8Y2-01	701	1
TCGA-3X-AAVC-01	709	0
TCGA-ZH-A8Y4-01	741	1
TCGA-W6-AA0S-01	808	0
TCGA-W5-AA2W-01	924	1
TCGA-W5-AA2H-01	1077	0
TCGA-W5-AA30-01	1153	0
TCGA-4G-AAZO-01	1177	0
TCGA-W5-AA2T-01	1220	1
TCGA-ZH-A8Y5-01	1229	0
TCGA-W5-AA36-01	1402	1
TCGA-W5-AA33-01	1449	0
TCGA-W5-AA38-01	1471	0
TCGA-W5-AA2R-01	1542	0
TCGA-W5-AA2Z-01	1614	0
TCGA-W5-AA2I-01	1939	1
TCGA-W5-AA2G-01	1976	0

## Sheet: TCGA_COAD_OS
svdata	time	event
TCGA-AA-3492-01	1	1
TCGA-G4-6626-01	1	1
TCGA-AA-3525-01	1	0
TCGA-AY-6196-01	6	0
TCGA-AM-5820-01	14	0
TCGA-F4-6854-01	16	0
TCGA-AA-A02O-01	28	0
TCGA-AM-5821-01	28	0
TCGA-AY-4071-01	29	1
TCGA-AA-A00R-01	30	0
TCGA-AA-3543-01	30	0
TCGA-AA-3818-01	30	1
TCGA-AA-3856-01	30	0
TCGA-AA-A01V-01	31	0
TCGA-AA-3514-01	31	0
TCGA-AA-3496-01	31	0
TCGA-AA-3494-01	31	0
TCGA-AA-3518-01	31	0
TCGA-AA-A01Q-01	31	0
TCGA-AA-A01S-01	31	0
TCGA-AA-3821-01	31	0
TCGA-AZ-4323-01	43	1
TCGA-F4-6704-01	47	0
TCGA-5M-AAT4-01	49	1
TCGA-AZ-6608-01	59	1
TCGA-AA-3666-01	61	1
TCGA-AA-3952-01	61	1
TCGA-CK-6748-01	61	0
TCGA-AA-A02H-01	61	1
TCGA-AA-3966-01	61	0
TCGA-AA-3930-01	61	1
TCGA-AA-A02E-01	90	1
TCGA-AZ-6607-01	97	1
TCGA-AA-A00N-01	122	1
TCGA-D5-6537-01	146	1
TCGA-4N-A93T-01	146	0
TCGA-AA-A02J-01	153	1
TCGA-CM-5862-01	153	1
TCGA-AA-3696-01	153	1
TCGA-AA-3488-01	153	1
TCGA-AZ-4616-01	156	1
TCGA-AZ-6605-01	159	1
TCGA-AZ-4614-01	172	1
TCGA-AD-6899-01	176	1
TCGA-DM-A285-01	179	1
TCGA-AA-3681-01	182	0
TCGA-AA-3662-01	184	0
TCGA-F4-6570-01	188	1
TCGA-AZ-6599-01	206	1
TCGA-AA-3663-01	212	0
TCGA-AA-3511-01	212	0
TCGA-AA-3489-01	214	1
TCGA-DM-A1DA-01	228	1
TCGA-D5-6898-01	229	0
TCGA-DM-A280-01	236	1
TCGA-AA-3989-01	242	1
TCGA-AA-3980-01	242	0
TCGA-CM-4750-01	244	0
TCGA-G4-6295-01	254	0
TCGA-A6-6141-01	255	0
TCGA-QG-A5Z1-01	256	1
TCGA-F4-6459-01	262	1
TCGA-D5-6926-01	275	0
TCGA-AA-3519-01	276	0
TCGA-D5-6927-01	287	0
TCGA-5M-AAT6-01	290	1
TCGA-A6-A5ZU-01	293	0
TCGA-NH-A6GA-01	302	1
TCGA-AA-3811-01	306	1
TCGA-AA-3848-01	306	1
TCGA-CM-6679-01	306	0
TCGA-CA-6718-01	306	1
TCGA-D5-6922-01	308	0
TCGA-D5-7000-01	312	0
TCGA-AD-6964-01	331	1
TCGA-NH-A50U-01	334	1
TCGA-AA-A01D-01	334	1
TCGA-CM-6172-01	335	0
TCGA-CM-6678-01	335	0
TCGA-AA-3680-01	335	1
TCGA-CM-6676-01	337	0
TCGA-CM-6677-01	337	0
TCGA-F4-6461-01	338	1
TCGA-D5-6932-01	346	0
TCGA-D5-6928-01	354	0
TCGA-AZ-6606-01	357	1
TCGA-T9-A92H-01	362	0
TCGA-CM-6162-01	365	0
TCGA-AA-A01G-01	365	0
TCGA-D5-6931-01	365	0
TCGA-CM-6680-01	366	0
TCGA-AZ-6600-01	368	1
TCGA-AD-5900-01	370	0
TCGA-CA-6716-01	371	0
TCGA-CA-5255-01	376	0
TCGA-D5-6920-01	377	0
TCGA-CA-5796-01	377	0
TCGA-D5-6923-01	378	0
TCGA-CA-5256-01	379	0
TCGA-D5-6539-01	380	0
TCGA-CA-6715-01	383	0
TCGA-CA-5797-01	383	0
TCGA-DM-A1D8-01	383	1
TCGA-4T-AA8H-01	385	0
TCGA-CA-5254-01	386	0
TCGA-CA-6717-01	388	0
TCGA-NH-A6GC-01	389	0
TCGA-CM-6674-01	394	0
TCGA-AA-3939-01	395	0
TCGA-CM-6168-01	395	0
TCGA-AA-3542-01	395	0
TCGA-CM-6169-01	396	0
TCGA-AA-3552-01	396	1
TCGA-AA-3516-01	396	1
TCGA-CM-4752-01	396	0
TCGA-AA-3973-01	397	0
TCGA-CM-6675-01	397	0
TCGA-F4-6809-01	403	1
TCGA-DM-A1D7-01	405	1
TCGA-D5-6930-01	406	0
TCGA-D5-6929-01	408	0
TCGA-G4-6323-01	419	0
TCGA-AA-A004-01	424	0
TCGA-AA-3561-01	424	0
TCGA-A6-2682-01	424	1
TCGA-AA-3544-01	426	0
TCGA-AA-A02K-01	426	1
TCGA-AA-3667-01	426	0
TCGA-CM-6163-01	427	0
TCGA-CM-6171-01	427	0
TCGA-DM-A288-01	427	1
TCGA-CA-6719-01	435	0
TCGA-D5-6924-01	435	0
TCGA-AU-3779-01	441	0
TCGA-A6-4105-01	442	1
TCGA-AA-3844-01	454	0
TCGA-CM-6167-01	456	0
TCGA-AA-A00W-01	456	0
TCGA-CM-6170-01	457	0
TCGA-CM-5863-01	457	0
TCGA-CM-5864-01	457	0
TCGA-CM-6161-01	457	0
TCGA-AA-A017-01	457	0
TCGA-AA-A01C-01	457	0
TCGA-AA-3679-01	457	0
TCGA-CM-5861-01	457	0
TCGA-D5-6535-01	460	0
TCGA-AD-6888-01	472	1
TCGA-D5-6541-01	474	0
TCGA-CK-4952-01	475	0
TCGA-3L-AA1B-01	475	0
TCGA-NH-A6GB-01	476	0
TCGA-AA-3833-01	485	0
TCGA-CM-6165-01	488	0
TCGA-AA-3971-01	489	0
TCGA-D5-6540-01	491	0
TCGA-A6-A565-01	494	1
TCGA-AY-4070-01	496	1
TCGA-AD-A5EK-01	500	0
TCGA-A6-2683-01	504	1
TCGA-NH-A8F8-01	511	1
TCGA-AA-3846-01	518	0
TCGA-AA-A00U-01	518	0
TCGA-CK-6751-01	518	0
TCGA-CM-5868-01	518	0
TCGA-AA-3866-01	518	0
TCGA-D5-6538-01	521	0
TCGA-AY-A54L-01	525	0
TCGA-CK-4947-01	534	0
TCGA-D5-6531-01	540	0
TCGA-AY-6386-01	542	0
TCGA-AY-A69D-01	543	0
TCGA-D5-6536-01	543	0
TCGA-NH-A8F7-01	543	0
TCGA-NH-A8F7-06	543	0
TCGA-AA-3554-01	546	0
TCGA-AA-3831-01	547	0
TCGA-AA-A00K-01	549	0
TCGA-AA-3875-01	549	0
TCGA-AA-A00J-01	549	0
TCGA-NH-A50T-01	553	0
TCGA-D5-6532-01	555	0
TCGA-DM-A1D6-01	570	1
TCGA-AY-A8YK-01	573	0
TCGA-AA-A00D-01	578	0
TCGA-AA-3688-01	578	0
TCGA-AA-3715-01	579	1
TCGA-AA-3713-01	579	0
TCGA-AA-3526-01	580	0
TCGA-AA-3530-01	580	0
TCGA-AA-3986-01	580	0
TCGA-AY-A71X-01	588	0
TCGA-NH-A50V-01	588	0
TCGA-NH-A50V-01	588	0
TCGA-D5-5539-01	596	0
TCGA-A6-6781-01	598	0
TCGA-A6-6781-01	598	0
TCGA-AA-3560-01	608	0
TCGA-AA-3562-01	608	0
TCGA-CM-4744-01	609	0
TCGA-A6-6780-01	612	0
TCGA-A6-6780-01	612	0
TCGA-D5-6529-01	614	0
TCGA-A6-6782-01	617	0
TCGA-D5-6530-01	621	0
TCGA-A6-6650-01	627	0
TCGA-A6-6650-01	627	0
TCGA-AA-3955-01	638	0
TCGA-AA-3549-01	639	0
TCGA-CK-5916-01	643	1
TCGA-AD-6548-01	650	0
TCGA-AY-6197-01	652	0
TCGA-A6-6651-01	662	0
TCGA-QL-A97D-01	666	0
TCGA-CM-6166-01	669	0
TCGA-AA-3968-01	669	0
TCGA-AA-A00Z-01	669	0
TCGA-CK-5914-01	669	0
TCGA-CM-5344-01	670	0
TCGA-AA-A02R-01	670	1
TCGA-A6-5665-01	671	0
TCGA-A6-5665-01	671	0
TCGA-G4-6321-01	672	0
TCGA-A6-5664-01	672	0
TCGA-AZ-4682-01	680	1
TCGA-AD-6901-01	682	1
TCGA-A6-6138-01	685	0
TCGA-CM-5348-01	699	0
TCGA-AA-3556-01	700	0
TCGA-CM-4743-01	701	0
TCGA-A6-5662-01	718	0
TCGA-A6-6654-01	726	0
TCGA-AA-3553-01	730	0
TCGA-AA-3979-01	730	0
TCGA-AA-3950-01	730	0
TCGA-AA-3941-01	730	0
TCGA-AA-3520-01	731	0
TCGA-AA-3867-01	731	0
TCGA-A6-6140-01	734	0
TCGA-A6-6649-01	735	0
TCGA-A6-2677-01	740	1
TCGA-A6-2677-01	740	1
TCGA-A6-6653-01	742	0
TCGA-DM-A0XD-01	743	1
TCGA-AD-6890-01	746	0
TCGA-A6-6652-01	751	0
TCGA-A6-A566-01	758	1
TCGA-AA-3977-01	761	0
TCGA-AA-3819-01	761	0
TCGA-CM-4747-01	761	0
TCGA-AD-6895-01	763	0
TCGA-A6-6142-01	763	0
TCGA-A6-6648-01	766	0
TCGA-D5-6533-01	775	0
TCGA-AA-3976-01	791	0
TCGA-AA-3538-01	791	0
TCGA-AA-A01X-01	791	0
TCGA-AA-3949-01	791	0
TCGA-G4-6322-01	792	0
TCGA-CM-4748-01	792	0
TCGA-G4-6588-01	796	0
TCGA-G4-6320-01	804	0
TCGA-DM-A28A-01	805	1
TCGA-AD-6965-01	805	0
TCGA-CK-6747-01	820	0
TCGA-AA-3710-01	821	0
TCGA-AA-3869-01	822	1
TCGA-AA-3994-01	822	0
TCGA-AA-3982-01	822	0
TCGA-AA-A00O-01	822	0
TCGA-CM-4751-01	822	0
TCGA-A6-6137-01	824	0
TCGA-AU-6004-01	824	0
TCGA-AD-6963-01	834	0
TCGA-G4-6294-01	858	1
TCGA-AA-3532-01	882	0
TCGA-AA-3534-01	882	0
TCGA-CM-6164-01	883	0
TCGA-CM-5341-01	884	0
TCGA-A6-5667-01	887	0
TCGA-A6-5660-01	888	0
TCGA-QG-A5YW-01	896	0
TCGA-AZ-6603-01	899	1
TCGA-AA-3555-01	911	0
TCGA-AA-3870-01	912	0
TCGA-AA-A00E-01	913	0
TCGA-AA-3862-01	914	0
TCGA-AA-3861-01	914	0
TCGA-CM-5349-01	915	0
TCGA-A6-5659-01	926	0
TCGA-A6-5659-01	926	0
TCGA-AA-A01K-01	943	0
TCGA-AA-A01I-01	943	0
TCGA-AA-3877-01	943	0
TCGA-AA-3858-01	945	0
TCGA-AA-3860-01	945	0
TCGA-QG-A5Z2-01	952	0
TCGA-A6-5657-01	962	0
TCGA-F4-6460-01	972	1
TCGA-CM-5860-01	974	0
TCGA-AA-A01F-01	974	0
TCGA-AA-3855-01	975	0
TCGA-A6-4107-01	987	0
TCGA-A6-5666-01	995	0
TCGA-A6-3809-01	996	0
TCGA-A6-3809-01	996	0
TCGA-A6-5656-01	1001	0
TCGA-A6-5656-01	1001	0
TCGA-AZ-4615-01	1002	0
TCGA-QG-A5YX-01	1003	0
TCGA-AA-3947-01	1004	0
TCGA-AY-5543-01	1004	0
TCGA-AA-A01T-01	1005	0
TCGA-AA-3815-01	1005	0
TCGA-AA-3851-01	1006	0
TCGA-A6-3808-01	1014	0
TCGA-A6-5661-01	1020	0
TCGA-A6-5661-01	1020	0
TCGA-F4-6808-01	1024	0
TCGA-AA-3548-01	1034	0
TCGA-AA-3956-01	1035	0
TCGA-AA-A00F-01	1035	0
TCGA-AA-3531-01	1035	0
TCGA-AA-3975-01	1036	0
TCGA-F4-6805-01	1047	0
TCGA-A6-3807-01	1054	0
TCGA-AA-A010-01	1064	0
TCGA-AA-A01R-01	1065	0
TCGA-AA-3502-01	1065	0
TCGA-AA-3812-01	1066	0
TCGA-A6-2680-01	1068	0
TCGA-F4-6856-01	1074	0
TCGA-F4-6569-01	1087	0
TCGA-F4-6463-01	1087	0
TCGA-G4-6586-01	1089	0
TCGA-G4-6314-01	1093	0
TCGA-DM-A28F-01	1094	1
TCGA-AA-3692-01	1095	1
TCGA-G4-6317-02	1095	0
TCGA-G4-6317-01	1095	0
TCGA-AA-3854-01	1096	0
TCGA-AA-3524-01	1096	0
TCGA-AA-3970-01	1096	0
TCGA-A6-3810-01	1111	0
TCGA-A6-3810-01	1111	0
TCGA-AA-3841-01	1124	0
TCGA-AA-3842-01	1126	0
TCGA-A6-2686-01	1126	1
TCGA-CM-4746-01	1126	0
TCGA-AA-A01Z-01	1126	0
TCGA-AA-3495-01	1127	0
TCGA-A6-2684-01	1127	0
TCGA-A6-2684-01	1127	0
TCGA-AA-3685-01	1127	0
TCGA-AA-3522-01	1127	0
TCGA-A6-2685-01	1133	0
TCGA-AA-A00L-01	1157	0
TCGA-AA-A00A-01	1157	0
TCGA-AA-A01P-01	1158	1
TCGA-DM-A0XF-01	1162	1
TCGA-RU-A8FL-01	1177	0
TCGA-AA-3837-01	1186	0
TCGA-AA-3517-01	1186	0
TCGA-AA-A024-01	1188	1
TCGA-G4-6311-01	1199	0
TCGA-5M-AATE-01	1200	0
TCGA-AA-A02Y-01	1216	0
TCGA-AA-A02F-01	1216	0
TCGA-AA-A03J-01	1246	0
TCGA-AA-A02W-01	1247	0
TCGA-F4-6806-01	1260	0
TCGA-AA-A00Q-01	1278	0
TCGA-A6-2678-01	1286	0
TCGA-QG-A5YV-01	1301	0
TCGA-A6-2676-01	1305	1
TCGA-F4-6807-01	1309	0
TCGA-D5-6534-01	1316	0
TCGA-A6-2675-01	1321	0
TCGA-A6-2674-01	1331	0
TCGA-A6-2674-01	1331	0
TCGA-A6-2671-01	1331	1
TCGA-DM-A1DB-01	1348	1
TCGA-G4-6306-01	1359	0
TCGA-A6-2679-01	1366	0
TCGA-D5-5537-01	1381	1
TCGA-A6-2681-01	1387	0
TCGA-A6-2672-01	1419	0
TCGA-A6-2672-01	1419	0
TCGA-AA-3678-01	1430	0
TCGA-AA-3675-01	1431	0
TCGA-F4-6855-01	1442	0
TCGA-F4-6703-01	1456	0
TCGA-CK-5912-01	1493	1
TCGA-AZ-6598-01	1503	1
TCGA-AA-3673-01	1522	0
TCGA-AA-3972-01	1551	0
TCGA-CK-5913-01	1561	0
TCGA-AA-A029-01	1581	0
TCGA-AA-3864-01	1612	0
TCGA-G4-6304-01	1631	0
TCGA-AA-3664-01	1643	0
TCGA-D5-5538-01	1661	1
TCGA-G4-6307-01	1674	0
TCGA-D5-5541-01	1701	0
TCGA-D5-5540-01	1706	0
TCGA-A6-A56B-01	1711	1
TCGA-AA-3506-01	1765	0
TCGA-AZ-4315-01	1776	0
TCGA-SS-A7HO-01	1829	0
TCGA-DM-A28G-01	1849	1
TCGA-AA-3655-01	1856	0
TCGA-A6-A567-01	1881	1
TCGA-G4-6315-01	1883	0
TCGA-AZ-5403-01	1910	1
TCGA-AA-3509-01	1915	0
TCGA-G4-6310-01	1935	0
TCGA-AA-3510-01	1946	0
TCGA-AZ-4684-01	1977	0
TCGA-G4-6303-01	2003	1
TCGA-WS-AB45-01	2130	0
TCGA-CK-4951-01	2134	1
TCGA-G4-6627-01	2175	0
TCGA-G4-6299-01	2268	0
TCGA-AZ-4313-01	2310	0
TCGA-AA-3660-01	2375	0
TCGA-G4-6628-01	2424	0
TCGA-DM-A28C-01	2475	1
TCGA-G4-6297-01	2506	0
TCGA-AD-6889-01	2532	1
TCGA-AA-3697-01	2587	0
TCGA-CK-4950-01	2599	0
TCGA-G4-6309-01	2600	0
TCGA-DM-A1HA-01	2600	0
TCGA-AZ-5407-01	2683	0
TCGA-G4-6625-01	2792	0
TCGA-DM-A1D4-01	2821	1
TCGA-DM-A28M-01	2895	0
TCGA-DM-A28K-01	2988	0
TCGA-AZ-6601-01	3042	1
TCGA-AZ-4308-01	3324	0
TCGA-DM-A28H-01	3561	0
TCGA-DM-A0X9-01	3641	0
TCGA-DM-A28E-01	3648	0
TCGA-DM-A1D0-01	3974	0
TCGA-G4-6293-01	4051	0
TCGA-DM-A1HB-01	4126	0
TCGA-DM-A282-01	4233	0
TCGA-DM-A1D9-01	4270	0
TCGA-CK-4948-01	4502	0

[truncated: 27 more sheets: TCGA_DLBC_OS, TCGA_ESCA_OS, TCGA_GBM_OS, TCGA_HNSC_OS, TCGA_KICH_OS, TCGA_KIRC_OS, TCGA_KIRP_OS, TCGA_LAML_OS, TCGA_LGG_OS, TCGA_LIHC_OS, TCGA_LUAD_OS, TCGA_LUSC_OS, TCGA_MESO_OS, TCGA_OV_OS, TCGA_PAAD_OS, TCGA_PCPG_OS, TCGA_PRAD_OS, TCGA_READ_OS, TCGA_SARC_OS, TCGA_SKCM_OS …]
